# Supplementary material
Source: publisher figshare collection journal article supplement (https://gsapubs.figshare.com/ndownloader/files/30871576)
Supplement: Supplementary file 1 [file 30871576]

## Sheet: 0.5 GPa
Table S3 Results of the modeling of mineral fractions and W and Sn concentrations in melt and minerals during partial melting at T = 650-1000 ℃ and P = 0.5, 0.7, and 0.9 GPa.
Temperature (°C)	Model fraction of minerals (wt%)													CW in melt (ppm)	CSn in melt (ppm)	Model fraction of W in Mus (wt%)	Model fraction of W in melt (wt%)	Model fraction of Sn in Bi (wt%)	Model fraction of Sn in melt (wt%)
	Melt	Cd	G	Bi	Mus	Opx	Ksp	Pl	Mt	Ilm	Sill	Q	H2O
650	0	0	0	0.340827	0.0949339	0	0	0.0481531	0	0.0122132	0.0308596	0.469016		0	0	0	0	0	0
651	0	0	0	0.34103	0.0945888	0	0	0.0482865	0	0.012151	0.0309281	0.469		0	0	0	0	0	0
652	0	0	0	0.341162	0.0942539	0	0	0.0484251	0	0.0120902	0.0309998	0.469035		0	0	0	0	0	0
653	0	0	0	0.341295	0.093919	0	0	0.0485638	0	0.0120294	0.0310716	0.46907		0	0	0	0	0	0
654	0	0	0	0.34143	0.0935847	0	0	0.0487028	0	0.0119686	0.031132	0.469108		0	0	0	0	0	0
655	0	0	0	0.341559	0.0932591	0	0	0.048841	0	0.0119076	0.0312034	0.469138		0	0	0	0	0	0
656	0	0	0	0.341689	0.0929335	0	0	0.0489793	0	0.0118449	0.031275	0.469169		0	0	0	0	0	0
657	0	0	0	0.341899	0.0925904	0	0	0.0491042	0	0.011783	0.0313325	0.469163		0	0	0	0	0	0
658	0	0	0	0.342024	0.0922741	0	0	0.0492419	0	0.0117219	0.0314036	0.469188		0	0	0	0	0	0
659	0	0	0	0.342161	0.0919502	0	0	0.0493715	0	0.0116611	0.0314642	0.469228		0	0	0	0	0	0
660	0	0	0	0.342294	0.0916254	0	0	0.0495007	0	0.0115985	0.0315361	0.469263		0	0	0	0	0	0
661	0.0182086	0	0	0.34245	0.0857851	0	0	0.0448026	0	0.0115228	0.033256	0.463975		10.9603	17.9288	85.1932	1.68842	66.4993	1.52408
662	0.0337508	0	0	0.341471	0.0801938	0	0	0.040797	0	0.0114039	0.0346986	0.457685		11.4351	18.115	83.0906	3.26517	66.9979	2.85433
663	0.0472153	0	0	0.340621	0.0751273	0	0	0.0375077	0	0.0112951	0.0360166	0.452217		11.9095	18.2922	81.0708	4.75729	67.485	4.03209
664	0.0479882	0	0	0.340772	0.0742724	0	0	0.0375222	0	0.0112114	0.0362399	0.451994		12.0106	18.3299	80.8287	4.87622	67.654	4.10654
665	0.0487839	0	0	0.340987	0.0733977	0	0	0.0375224	0	0.0111263	0.03647	0.451713		12.1155	18.3665	80.5744	5.00036	67.8317	4.18296
666	0.0495978	0	0	0.341195	0.0725011	0	0	0.0375314	0	0.0110392	0.036711	0.451425		12.225	18.4045	80.3095	5.12975	68.0136	4.26156
667	0.0504454	0	0	0.341329	0.071601	0	0	0.0375345	0	0.0109549	0.0369556	0.451179		12.337	18.4452	80.0386	5.26517	68.1907	4.34395
668	0.0513159	0	0	0.341531	0.0706619	0	0	0.0375333	0	0.0108677	0.0372074	0.450883		12.4558	18.4858	79.7497	5.40762	68.3812	4.42864
669	0.0522112	0	0	0.34177	0.0697097	0	0	0.0375265	0	0.0107799	0.0374632	0.45054		12.5783	18.5257	79.4487	5.55607	68.5767	4.51564
670	0.053144	0	0	0.341896	0.0687356	0	0	0.0375191	0	0.0106919	0.03773	0.450284		12.7065	18.5709	79.1372	5.713	68.7693	4.60752
671	0.0541046	0	0	0.342121	0.0677291	0	0	0.0375108	0	0.0106036	0.0380074	0.449923		12.8413	18.6143	78.8055	5.87795	68.9754	4.70176
672	0.0550947	0	0	0.342351	0.0666924	0	0	0.0374935	0	0.0105138	0.0382854	0.449569		12.9831	18.6593	78.4564	6.05162	69.1888	4.79939
673	0.0561306	0	0	0.342568	0.0656325	0	0	0.0374747	0	0.0104236	0.0385734	0.449198		13.1312	18.7059	78.0899	6.23571	69.4056	4.90185
674	0.0572009	0	0	0.342711	0.0645377	0	0	0.0374596	0	0.0103327	0.0388882	0.44887		13.2882	18.7573	77.7052	6.43058	69.6255	5.00904
675	0.0583128	0	0	0.342922	0.0634046	0	0	0.0374306	0	0.0102406	0.0391986	0.448491		13.4542	18.8085	77.2946	6.63747	69.8584	5.12034
676	0.0594681	0	0	0.343163	0.0622357	0	0	0.0374049	0	0.0101477	0.039524	0.448056		13.6295	18.8605	76.8585	6.85721	70.1008	5.23623
677	0.0606642	0	0	0.343362	0.0610282	0	0	0.0373746	0	0.0100535	0.039856	0.447662		13.8158	18.9165	76.3974	7.09073	70.3495	5.35739
678	0.0619224	0	0	0.343587	0.0597739	0	0	0.0373375	0	0.00995838	0.0402141	0.447207		14.0144	18.974	75.9027	7.34183	70.6098	5.48514
679	0.0619224	0	0	0.343587	0.0597739	0	0	0.0373375	0	0.00995838	0.0402141	0.447207		14.0144	18.974	75.9027	7.34183	70.6098	5.48514
680	0.0975295	0	0	0.346131	0	0	0.0292814	0.0264531	0	0.00975743	0.060328	0.43052		49.2937	23.3361	0	40.6733	87.4859	10.6254
681	0.0979986	0	0	0.346091	0	0	0.0291596	0.0263636	0	0.00972727	0.0603787	0.430281		49.2031	23.3281	0	40.7939	87.4457	10.6728
682	0.0983808	0	0	0.346083	0	0	0.0290314	0.0262765	0	0.00969802	0.0604465	0.430083		49.1279	23.3203	0	40.8904	87.4146	10.7109
683	0.0988608	0	0	0.345975	0	0	0.0288947	0.0261899	0	0.00967066	0.0605155	0.429893		49.0411	23.316	0	41.0172	87.3711	10.7611
684	0.0992523	0	0	0.346	0	0	0.0287692	0.0261054	0	0.00964232	0.060589	0.429641		48.9617	23.306	0	41.1131	87.3401	10.7991
685	0.0997209	0	0	0.34596	0	0	0.0286383	0.0260158	0	0.00961215	0.0606511	0.429402		48.8726	23.2981	0	41.2319	87.3	10.8464
686	0.100116	0	0	0.345889	0	0	0.0285047	0.0259321	0	0.00958582	0.060715	0.429258		48.8007	23.2937	0	41.3343	87.2657	10.8873
687	0.100584	0	0	0.345848	0	0	0.0283646	0.0258521	0	0.00955565	0.060777	0.429019		48.7121	23.2856	0	41.4523	87.2251	10.9345
688	0.100978	0	0	0.34588	0	0	0.0282306	0.0257681	0	0.0095275	0.0608403	0.428776		48.6329	23.2752	0	41.5469	87.1943	10.9724
689	0.101458	0	0	0.345772	0	0	0.0280939	0.0256815	0	0.00950014	0.0609093	0.428585		48.5478	23.2709	0	41.6713	87.1509	11.0225
690	0.101927	0	0	0.345734	0	0	0.0279542	0.0255922	0	0.00947007	0.0609718	0.42835		48.4597	23.2628	0	41.7881	87.111	11.0696
691	0.102322	0	0	0.34577	0	0	0.0278113	0.0255084	0	0.009442	0.0610357	0.428111		48.3807	23.2522	0	41.8816	87.0802	11.1074
692	0.102803	0	0	0.345666	0	0	0.0276749	0.0254221	0	0.00941475	0.0610938	0.427926		48.296	23.2476	0	42.0048	87.0369	11.1574
693	0.103273	0	0	0.345631	0	0	0.0275264	0.0253331	0	0.00938477	0.0611569	0.427695		48.2084	23.2393	0	42.1204	86.9971	11.2045
694	0.103657	0	0	0.345631	0	0	0.0273806	0.0252562	0	0.00935572	0.0612144	0.427505		48.1352	23.231	0	42.2129	86.9659	11.2421
695	0.104139	0	0	0.345635	0	0	0.0272261	0.0251701	0	0.00932852	0.0612729	0.427228		48.0427	23.2201	0	42.3275	86.9262	11.2891
696	0.104621	0	0	0.345535	0	0	0.0270809	0.0250841	0	0.00929966	0.0613317	0.427048		47.9587	23.2153	0	42.4492	86.8831	11.339
697	0.105092	0	0	0.345504	0	0	0.0269328	0.0249954	0	0.00926981	0.0613839	0.426821		47.8718	23.2068	0	42.5631	86.8434	11.3859
698	0.105478	0	0	0.34551	0	0	0.0267783	0.0249094	0	0.00924263	0.0614425	0.426639		47.7988	23.1983	0	42.6542	86.8129	11.4235
699	0.105971	0	0	0.345445	0	0	0.0266267	0.0248259	0	0.00921472	0.0615076	0.426408		47.7107	23.1911	0	42.7747	86.7698	11.4733
700	0.106443	0	0	0.345418	0	0	0.0264698	0.0247375	0	0.00918496	0.0615604	0.426186		47.6243	23.1824	0	42.8874	86.7303	11.5201
701	0.106915	0	0	0.34539	0	0	0.0263128	0.0246491	0	0.00915689	0.061613	0.425963		47.5382	23.1737	0	42.9996	86.6908	11.5668
702	0.107408	0	0	0.345325	0	0	0.026152	0.0245655	0	0.00912895	0.0616896	0.425731		47.4511	23.1666	0	43.1188	86.6478	11.6166
703	0.10788	0	0	0.345298	0	0	0.0259951	0.0244868	0	0.00909921	0.0617309	0.42551		47.3656	23.1577	0	43.2302	86.6079	11.6632
704	0.108363	0	0	0.345306	0	0	0.0258318	0.0244009	0	0.00907209	0.06179	0.425237		47.2756	23.1466	0	43.3411	86.5686	11.7098
705	0.108847	0	0	0.345212	0	0	0.0256688	0.0243153	0	0.00904339	0.0618499	0.425064		47.1934	23.1415	0	43.4592	86.5257	11.7595
706	0.10932	0	0	0.345187	0	0	0.025503	0.0242271	0	0.00901542	0.0619031	0.424845		47.1084	23.1326	0	43.5692	86.4864	11.806
707	0.109889	0	0	0.345165	0	0	0.0253283	0.0241392	0	0.00898582	0.0619569	0.424535		47.0055	23.1212	0	43.7005	86.4382	11.8617
708	0.110374	0	0	0.345071	0	0	0.0251653	0.0240535	0	0.00895882	0.0620167	0.424361		46.9242	23.1161	0	43.8171	86.3954	11.9113
709	0.110858	0	0	0.345082	0	0	0.0249931	0.0239679	0	0.00893008	0.0620764	0.424093		46.8354	23.1048	0	43.926	86.3563	11.9577
710	0.111343	0	0	0.344991	0	0	0.0248212	0.0238825	0	0.00890146	0.0621369	0.423924		46.7543	23.0995	0	44.042	86.3136	12.0073
711	0.111912	0	0	0.344969	0	0	0.0246465	0.0237945	0	0.00887356	0.0621905	0.423614		46.6529	23.0881	0	44.1711	86.2656	12.0628
712	0.112387	0	0	0.344952	0	0	0.0244722	0.0237069	0	0.00884409	0.0622335	0.423404		46.569	23.0788	0	44.2787	86.2265	12.109
713	0.112968	0	0	0.34486	0	0	0.0242911	0.0236311	0	0.00881714	0.0622938	0.423139		46.4713	23.0711	0	44.4143	86.1745	12.1676
714	0.113442	0	0	0.344842	0	0	0.0241077	0.0235434	0	0.00878765	0.0623482	0.422929		46.3882	23.0618	0	44.521	86.1356	12.2138
715	0.113926	0	0	0.344853	0	0	0.0239354	0.0234577	0	0.00876061	0.0624078	0.422659		46.3013	23.0507	0	44.6273	86.0967	12.2599
716	0.114499	0	0	0.344735	0	0	0.0237434	0.0233704	0	0.00873299	0.0624633	0.422456		46.2082	23.0448	0	44.7613	86.0453	12.3184
717	0.11507	0	0	0.34472	0	0	0.0235602	0.023283	0	0.0087036	0.0625068	0.422156		46.1083	23.033	0	44.8875	85.9976	12.3736
718	0.115557	0	0	0.344632	0	0	0.0233793	0.0231978	0	0.00867674	0.0625678	0.42199		46.0292	23.0276	0	44.9999	85.9551	12.4229
719	0.116128	0	0	0.344616	0	0	0.023187	0.0231103	0	0.00864732	0.0626226	0.421688		45.9302	23.0158	0	45.125	85.9075	12.478
720	0.1167	0	0	0.344605	0	0	0.022995	0.0230231	0	0.0086197	0.0626666	0.421391		45.8311	23.0039	0	45.2495	85.86	12.533
721	0.117273	0	0	0.344486	0	0	0.022803	0.0229359	0	0.00859209	0.0627221	0.421188		45.7398	22.9981	0	45.381	85.8088	12.5912
722	0.117761	0	0	0.344511	0	0	0.0226043	0.0228511	0	0.00856368	0.0627727	0.420936		45.6537	22.9861	0	45.4843	85.7703	12.6371
723	0.118345	0	0	0.344425	0	0	0.0224144	0.022766	0	0.00853688	0.0628342	0.420678		45.5589	22.9781	0	45.6147	85.7191	12.6953
724	0.118906	0	0	0.34438	0	0	0.0222111	0.0226766	0	0.00850844	0.0628836	0.420435		45.4658	22.9684	0	45.7372	85.6718	12.7501
725	0.119492	0	0	0.344302	0	0	0.0220126	0.022592	0	0.00848012	0.0629349	0.420187		45.3708	22.96	0	45.8667	85.6208	12.8083
726	0.120064	0	0	0.344289	0	0	0.0218114	0.0225047	0	0.00845248	0.0629902	0.419888		45.2742	22.9482	0	45.988	85.5736	12.8629
727	0.120651	0	0	0.344214	0	0	0.0216039	0.0224203	0	0.00842592	0.063042	0.419643		45.1796	22.9395	0	46.1164	85.5227	12.921
728	0.121307	0	0	0.344168	0	0	0.0214007	0.0223309	0	0.00839748	0.0630912	0.419305		45.0716	22.9276	0	46.2564	85.4668	12.9845
729	0.12187	0	0	0.34413	0	0	0.0211889	0.022242	0	0.00836754	0.0631305	0.419071		44.9796	22.9175	0	46.3763	85.4198	13.039
730	0.122457	0	0	0.344054	0	0	0.0209813	0.0221479	0	0.00834096	0.0631937	0.418825		44.8863	22.9091	0	46.503	85.3695	13.097
731	0.123033	0	0	0.344052	0	0	0.0207626	0.0220613	0	0.00831358	0.0632393	0.418539		44.7905	22.8967	0	46.6217	85.3227	13.1514
732	0.123704	0	0	0.343943	0	0	0.020553	0.0219748	0	0.00828622	0.0632851	0.418254		44.6859	22.8879	0	46.7668	85.2632	13.2182
733	0.124278	0	0	0.343936	0	0	0.0203341	0.0218879	0	0.00825874	0.0633415	0.417963		44.5914	22.8758	0	46.8844	85.2164	13.2725
734	0.124951	0	0	0.343831	0	0	0.0201156	0.0218016	0	0.00823145	0.0633878	0.417682		44.4874	22.8669	0	47.0282	85.1571	13.3391
735	0.125526	0	0	0.343828	0	0	0.0198969	0.021715	0	0.00820407	0.0634334	0.417396		44.3932	22.8545	0	47.1447	85.1104	13.3933
736	0.1262	0	0	0.343725	0	0	0.0196695	0.0216192	0	0.00817684	0.0634917	0.417118		44.2898	22.8456	0	47.2873	85.0517	13.4599
737	0.126874	0	0	0.343623	0	0	0.0194421	0.021533	0	0.00814962	0.0635386	0.41684		44.1867	22.8365	0	47.4292	84.9925	13.5264
738	0.12745	0	0	0.343623	0	0	0.0192145	0.0214466	0	0.00812232	0.0635849	0.416558		44.0934	22.824	0	47.5441	84.9461	13.5804
739	0.128124	0	0	0.343521	0	0	0.018987	0.0213604	0	0.0080951	0.0636318	0.416281		43.9913	22.8149	0	47.6848	84.887	13.6468
740	0.128784	0	0	0.343488	0	0	0.0187576	0.0212623	0	0.00806701	0.0636833	0.415958		43.8874	22.8025	0	47.8173	84.8325	13.7096
741	0.129459	0	0	0.343389	0	0	0.0185212	0.0211764	0	0.00803986	0.0637307	0.415684		43.7859	22.7932	0	47.9567	84.7736	13.7759
742	0.13012	0	0	0.34336	0	0	0.0182829	0.0210881	0	0.00801187	0.0637714	0.415366		43.6825	22.7804	0	48.0878	84.7187	13.8384
743	0.130796	0	0	0.343263	0	0	0.0180467	0.0209927	0	0.00798649	0.0638194	0.415095		43.5815	22.7711	0	48.2258	84.6604	13.9047
744	0.131473	0	0	0.343167	0	0	0.0178014	0.0209069	0	0.00795942	0.0638674	0.414825		43.4809	22.7617	0	48.3633	84.6016	13.9708
745	0.132146	0	0	0.34317	0	0	0.0175648	0.0208207	0	0.00793218	0.0639141	0.414452		43.3749	22.7468	0	48.4926	84.547	14.0331
746	0.132907	0	0	0.343044	0	0	0.017318	0.0207235	0	0.00790611	0.0639566	0.414146		43.2638	22.7372	0	48.6468	84.4802	14.108
747	0.133583	0	0	0.342947	0	0	0.0170635	0.0206376	0	0.00787902	0.064016	0.413875		43.1648	22.7279	0	48.7823	84.4217	14.1739
748	0.134246	0	0	0.342924	0	0	0.0168166	0.0205402	0	0.00785118	0.0640578	0.413564		43.0636	22.7149	0	48.9097	84.3678	14.2361
749	0.135016	0	0	0.342822	0	0	0.0165619	0.0204445	5.67097e-05	0.00780009	0.0641049	0.413193		42.9526	22.7037	0	49.0634	84.3013	14.3108
750	0.135768	0	0	0.342674	0	0	0.0163141	0.020346	0.000189878	0.0077155	0.0641317	0.412861		42.8499	22.6956	0	49.2187	84.2348	14.3853
751	0.136532	0	0	0.342558	0	0	0.0160587	0.0202494	0.000321447	0.00763165	0.064176	0.412472		42.7437	22.6854	0	49.3731	84.1684	14.4598
752	0.137285	0	0	0.342413	0	0	0.015793	0.0201512	0.00045188	0.00754717	0.0642149	0.412144		42.6416	22.6771	0	49.5268	84.1021	14.5342
753	0.13805	0	0	0.342297	0	0	0.0155377	0.0200546	0.000580653	0.00746505	0.0642593	0.411756		42.5364	22.6669	0	49.6796	84.0359	14.6086
754	0.138817	0	0	0.342189	0	0	0.0152736	0.0199585	0.000708595	0.00738309	0.0642935	0.411377		42.4307	22.6563	0	49.8316	83.9697	14.6829
755	0.139655	0	0	0.342018	0	0	0.0149977	0.0198492	0.000834982	0.0073015	0.0643275	0.411017		42.3187	22.6476	0	50	83.8957	14.7658
756	0.140435	0	0	0.341836	0	0	0.0147352	0.019755	0.000960471	0.00722196	0.0643794	0.410677		42.2164	22.6407	0	50.1579	83.8254	14.8439
757	0.141286	0	0	0.341698	0	0	0.0144608	0.0196572	0.00108467	0.00714111	0.0644082	0.410263		42.1014	22.6297	0	50.3245	83.751	14.9266
758	0.142041	0	0	0.34156	0	0	0.0141865	0.0195499	0.001208	0.00706197	0.0644484	0.409944		42.0013	22.6212	0	50.4731	83.6857	15.0007
759	0.142894	0	0	0.341426	0	0	0.0139033	0.0194523	0.00133048	0.00698292	0.0644777	0.409534		41.8871	22.61	0	50.6378	83.6114	15.0832
760	0.143744	0	0	0.341288	0	0	0.01362	0.0193546	0.00145209	0.00690381	0.0645179	0.409119		41.7739	22.5991	0	50.8016	83.5373	15.1657
761	0.144597	0	0	0.341157	0	0	0.013337	0.0192477	0.00157287	0.00682656	0.0645478	0.408714		41.6604	22.5878	0	50.9643	83.4638	15.2481
762	0.145463	0	0	0.340949	0	0	0.0130551	0.019152	0.00169294	0.0067499	0.0645948	0.408343		41.5502	22.5804	0	51.1338	83.3855	15.3344
763	0.146318	0	0	0.340822	0	0	0.0127632	0.0190453	0.00181231	0.00667273	0.0646254	0.407941		41.4375	22.569	0	51.2948	83.3121	15.4166
764	0.147172	0	0	0.340694	0	0	0.0124714	0.0189386	0.00193111	0.00659727	0.064656	0.407539		41.3254	22.5576	0	51.4547	83.2388	15.4988
765	0.148026	0	0	0.340566	0	0	0.0121704	0.0188415	0.00204933	0.00652182	0.0646865	0.407138		41.2139	22.5461	0	51.6138	83.1652	15.5808
766	0.148978	0	0	0.340335	0	0	0.0118696	0.018735	0.002167	0.00644644	0.0647291	0.40674		41.095	22.5381	0	51.7957	83.0793	15.6755
767	0.149834	0	0	0.340211	0	0	0.0115689	0.0186285	0.00228411	0.00637107	0.0647604	0.406342		40.9843	22.5265	0	51.9529	83.0063	15.7574
768	0.15077	0	0	0.340054	0	0	0.0112671	0.0185202	0.00240068	0.00629681	0.0647853	0.405905		40.8646	22.5149	0	52.125	82.9251	15.8477
769	0.151643	0	0	0.339863	0	0	0.0109586	0.0184159	0.00251748	0.00622389	0.0648239	0.405554		40.7564	22.5066	0	52.288	82.8479	15.9336
770	0.152581	0	0	0.339708	0	0	0.0106479	0.0183078	0.00263347	0.0061514	0.0648493	0.405121		40.6376	22.4948	0	52.458	82.7668	16.0237
771	0.153551	0	0	0.339519	0	0	0.0103304	0.0182036	0.00274973	0.00607852	0.0648885	0.404679		40.517	22.4841	0	52.6347	82.6814	16.1179
772	0.154489	0	0	0.339366	0	0	0.0100198	0.0180956	0.00286373	0.00600608	0.064914	0.404246		40.3996	22.4723	0	52.8027	82.6006	16.2078
773	0.155526	0	0	0.339114	0	0	0.00969137	0.0179881	0.00298085	0.00593381	0.0649412	0.403824		40.2745	22.4635	0	52.9927	82.5071	16.3102
774	0.156481	0	0	0.338999	0	0	0.00937293	0.0178726	0.00309542	0.00586206	0.064974	0.403343		40.154	22.4493	0	53.1585	82.427	16.4
775	0.157517	0	0	0.338747	0	0	0.00904462	0.017765	0.0032125	0.00579151	0.0650011	0.402921		40.0305	22.4406	0	53.346	82.3337	16.5022
776	0.158474	0	0	0.338635	0	0	0.00871542	0.0176497	0.00332708	0.00571984	0.0650346	0.402444		39.911	22.4262	0	53.5097	82.2539	16.5918
777	0.159511	0	0	0.338386	0	0	0.00838183	0.0175424	0.00344134	0.00565105	0.0650621	0.402024		39.7887	22.4173	0	53.6949	82.1608	16.6938
778	0.160567	0	0	0.338176	0	0	0.00804562	0.0174275	0.00355878	0.00558124	0.0650857	0.401558		39.6625	22.406	0	53.879	82.0683	16.7958
779	0.161605	0	0	0.338035	0	0	0.0077058	0.0173107	0.00367303	0.0055108	0.0651136	0.401046		39.536	22.3914	0	54.0542	81.9806	16.8934
780	0.162658	0	0	0.33782	0	0	0.00736313	0.0172052	0.0037904	0.0054426	0.0651476	0.400573		39.412	22.3803	0	54.2359	81.8879	16.9951
781	0.16378	0	0	0.337549	0	0	0.00701567	0.0170872	0.00390713	0.00537352	0.0651594	0.400128		39.2828	22.3708	0	54.431	81.7876	17.1051
782	0.178227	0.00682382	0.0204393	0.311889	0	0	0.0154184	0.0132736	0	0.00821829	0.0601394	0.385571		38.5108	23.4344	0	58.0681	79.1631	19.4988
783	0.185861	0.0174006	0.0265958	0.296802	0	0	0.0211469	0.0116223	0	0.00910662	0.0543695	0.377095		38.2405	24.1482	0	60.1306	77.6284	20.9534
784	0.194132	0.0287309	0.0332257	0.280467	0	0	0.0271486	0.0100005	0	0.0100711	0.0481988	0.368025		37.9516	24.9692	0	62.332	75.85	22.63
785	0.203074	0.0409463	0.0404	0.262796	0	0	0.0334959	0.00839166	0	0.0111244	0.0415581	0.358214		37.6442	25.9203	0	64.6747	73.778	24.5739
786	0.212798	0.0541794	0.0482196	0.243663	0	0	0.0402517	0.00677482	0	0.0122821	0.0343697	0.347461		37.3108	27.0311	0	67.1716	71.3381	26.8542
787	0.223437	0.068595	0.0567923	0.222626	0	0	0.0475119	0.00513078	0	0.0135592	0.0265671	0.335781		36.9571	28.3673	0	69.8611	68.4008	29.5906
788	0.235195	0.0843793	0.0662529	0.199526	0	0	0.0553699	0.00343603	0	0.014975	0.0180179	0.322849		36.567	29.9893	0	72.7611	64.8087	32.9287
789	0.248126	0.101801	0.0767822	0.174014	0	0	0.0639586	0.00166923	0	0.0165535	0.00861085	0.308485		36.1506	32.0098	0	75.8875	60.3304	37.0796
790	0.26089	0.117647	0.087283	0.149593	0	0	0.0717882	0	0	0.0180475	0	0.294752		35.7182	34.192	0	78.8369	55.3993	41.6449
791	0.26401	0.117309	0.0898876	0.146727	0	0	0.0714456	0	0	0.0181543	0	0.292466		35.4919	34.362	0	79.2744	54.6082	42.3526
792	0.267129	0.116973	0.0925043	0.143868	0	0	0.0710765	0	0	0.0182612	0	0.290187		35.2683	34.5329	0	79.7055	53.8104	43.066
793	0.270313	0.116548	0.0950912	0.141109	0	0	0.0706913	0	0	0.018366	0	0.287882		35.0368	34.6892	0	80.126	53.0172	43.7766
794	0.273504	0.116207	0.0976779	0.138252	0	0	0.0702917	0	0	0.0184715	0	0.285596		34.8115	34.8593	0	80.5506	52.1987	44.5106
795	0.276742	0.115811	0.100264	0.135427	0	0	0.0698875	0	0	0.0185977	0	0.283271		34.5823	35.0244	0	80.9676	51.374	45.2507
796	0.280025	0.115395	0.102843	0.132582	0	0	0.0694533	0	0	0.0187032	0	0.280998		34.3532	35.191	0	81.3853	50.5343	46.0054
797	0.28321	0.114983	0.105406	0.129855	0	0	0.0690029	0	0	0.0188088	0	0.278735		34.1321	35.3494	0	81.7814	49.7175	46.7381
798	0.286571	0.114565	0.107942	0.127017	0	0	0.068531	0	0	0.0189133	0	0.276461		33.9013	35.5143	0	82.1922	48.8577	47.5133
799	0.289852	0.114158	0.110484	0.124303	0	0	0.0680474	0	0	0.0190366	0	0.274119		33.6757	35.6683	0	82.5801	48.0212	48.2658
800	0.293213	0.113747	0.113001	0.12148	0	0	0.0675523	0	0	0.0191415	0	0.271865		33.4504	35.8343	0	82.9788	47.149	49.0527
801	0.296544	0.113327	0.115505	0.118761	0	0	0.067025	0	0	0.0192447	0	0.269593		33.2271	35.9894	0	83.3614	46.2931	49.8247
802	0.299931	0.112854	0.117998	0.116071	0	0	0.0664938	0	0	0.019369	0	0.267284		33	36.1384	0	83.7369	45.4319	50.6024
803	0.303341	0.112433	0.120459	0.113359	0	0	0.0659208	0	0	0.0194713	0	0.265015		32.7754	36.2908	0	84.1126	44.5576	51.3935
804	0.306781	0.112027	0.122901	0.110666	0	0	0.0653473	0	0	0.0195931	0	0.262686		32.5499	36.4402	0	84.4812	43.678	52.1903
805	0.310213	0.111543	0.125337	0.108009	0	0	0.0647468	0	0	0.0196973	0	0.260454		32.3275	36.5862	0	84.8426	42.8001	52.9856
806	0.313676	0.111073	0.127753	0.105379	0	0	0.0641364	0	0	0.0198209	0	0.258162		32.1039	36.7277	0	85.1963	41.9196	53.7842
807	0.317157	0.110655	0.130121	0.102741	0	0	0.0634939	0	0	0.0199224	0	0.255909		31.8829	36.8709	0	85.5491	41.0295	54.5933
808	0.320691	0.110182	0.132494	0.100148	0	0	0.0628458	0	0	0.0200274	0	0.253612		31.6589	37.0052	0	85.8945	40.1397	55.4027
809	0.324194	0.1097	0.134837	0.0975619	0	0	0.0621661	0	0	0.0201479	0	0.251393		31.44	37.1419	0	86.2321	39.2476	56.2147
810	0.327804	0.109225	0.137153	0.0949961	0	0	0.0614726	0	0	0.0202521	0	0.249097		31.2151	37.2699	0	86.5688	38.3471	57.0366
811	0.331382	0.108819	0.139439	0.0924484	0	0	0.0607568	0	0	0.0203715	0	0.246783		30.9951	37.3987	0	86.8967	37.4476	57.8582
812	0.334965	0.10834	0.141696	0.0899299	0	0	0.0600169	0	0	0.0204744	0	0.244578		30.7774	37.5239	0	87.2194	36.5494	58.6796
813	0.338575	0.107873	0.143948	0.0874352	0	0	0.0592658	0	0	0.0205962	0	0.242306		30.5592	37.6445	0	87.5346	35.6497	59.5028
814	0.34223	0.107392	0.146147	0.0849541	0	0	0.0584804	0	0	0.0206979	0	0.240099		30.341	37.7616	0	87.8478	34.7459	60.3322
815	0.345849	0.106933	0.148356	0.0825043	0	0	0.0576895	0	0	0.0208206	0	0.237848		30.127	37.8769	0	88.1507	33.8469	61.1563
816	0.349557	0.106444	0.150518	0.0800673	0	0	0.0568652	0	0	0.0209201	0	0.235628		29.9098	37.9855	0	88.4532	32.9414	61.9893
817	0.353254	0.105984	0.152657	0.0776554	0	0	0.0560298	0	0	0.021042	0	0.233378		29.6951	38.0919	0	88.747	32.0386	62.8203
818	0.357008	0.105515	0.154778	0.0752721	0	0	0.0551722	0	0	0.0211446	0	0.231111		29.479	38.1907	0	89.0376	31.1358	63.6526
819	0.360718	0.105035	0.15688	0.0728957	0	0	0.0542921	0	0	0.021262	0	0.228917		29.2687	38.2923	0	89.321	30.233	64.4852
820	0.364551	0.104517	0.158884	0.0705593	0	0	0.0534052	0	0	0.0213696	0	0.226714		29.0519	38.3807	0	89.6016	29.3316	65.3209
821	0.368373	0.104047	0.160841	0.068228	0	0	0.0524774	0	0	0.0214882	0	0.224545		28.8388	38.4702	0	89.8769	28.4286	66.1597
822	0.372174	0.103574	0.162938	0.0659191	0	0	0.0515308	0	0	0.0215886	0	0.222276		28.6298	38.5564	0	90.1461	27.5281	66.992
823	0.37602	0.103115	0.164905	0.0636339	0	0	0.0505748	0	0	0.021709	0	0.220042		28.4198	38.6376	0	90.4097	26.6297	67.8268
824	0.379834	0.10265	0.166857	0.0613689	0	0	0.0495895	0	0	0.0218106	0	0.21789		28.2151	38.7183	0	90.6688	25.7356	68.6579
825	0.383823	0.102133	0.168695	0.0591314	0	0	0.0485893	0	0	0.0219339	0	0.215695		28.0006	38.7841	0	90.9246	24.8394	69.4968
826	0.387725	0.101671	0.170643	0.0569058	0	0	0.0475622	0	0	0.0220355	0	0.213458		27.7951	38.853	0	91.1746	23.9469	70.328
827	0.391733	0.101214	0.172447	0.0546968	0	0	0.0465205	0	0	0.0221548	0	0.211234		27.5851	38.9137	0	91.4214	23.0533	71.1661
828	0.39565	0.10076	0.174253	0.0525136	0	0	0.0454544	0	0	0.0222575	0	0.209112		27.3839	38.9769	0	91.6619	22.169	71.9945
829	0.399656	0.100306	0.176056	0.050344	0	0	0.0443627	0	0	0.022377	0	0.206899		27.1793	39.0319	0	91.898	21.2831	72.8259
830	0.403746	0.0997764	0.177854	0.0481876	0	0	0.0432539	0	0	0.022496	0	0.204686		26.9721	39.0789	0	92.1312	20.3961	73.6599
831	0.407749	0.0993264	0.179655	0.0460572	0	0	0.0421301	0	0	0.0225987	0	0.202484		26.7732	39.128	0	92.3584	19.5188	74.4837
832	0.411922	0.0988738	0.181299	0.0439388	0	0	0.0409703	0	0	0.0227174	0	0.200278		26.5667	39.165	0	92.584	18.6387	75.3173
833	0.415983	0.098419	0.183084	0.041833	0	0	0.0397932	0	0	0.0228184	0	0.19807		26.3698	39.2065	0	92.8037	17.7642	76.1403
834	0.420182	0.0979009	0.18474	0.0397457	0	0	0.0386044	0	0	0.0229388	0	0.195888		26.1672	39.2367	0	93.0202	16.8908	76.968
835	0.424346	0.0974523	0.186381	0.0376795	0	0	0.0373875	0	0	0.0230575	0	0.193696		25.9692	39.2661	0	93.2313	16.0248	77.7891
836	0.428617	0.0970085	0.188028	0.0356179	0	0	0.0361468	0	0	0.0231601	0	0.191422		25.7685	39.2872	0	93.4417	15.1561	78.6142
837	0.432898	0.0965685	0.189531	0.0335813	0	0	0.0348911	0	0	0.0232802	0	0.18925		25.5696	39.3052	0	93.6467	14.296	79.4357
838	0.437115	0.0961166	0.191155	0.0315536	0	0	0.0336055	0	0	0.0233971	0	0.187057		25.3769	39.3249	0	93.8463	13.4396	80.2499
839	0.441496	0.0956816	0.192662	0.0295447	0	0	0.0323095	0	0	0.023501	0	0.184805		25.1784	39.3312	0	94.0454	12.5859	81.0671
840	0.445868	0.0951708	0.194165	0.0275484	0	0	0.0309788	0	0	0.0236214	0	0.182648		24.9828	39.3362	0	94.239	11.737	81.8802
841	0.45025	0.0947394	0.195673	0.0255555	0	0	0.0296329	0	0	0.0237424	0	0.180406		24.7897	39.3398	0	94.4293	10.8889	82.6927
842	0.454678	0.0942993	0.19716	0.0235836	0	0	0.0282678	0	0	0.023861	0	0.17815		24.5968	39.337	0	94.616	10.048	83.4999
843	0.459229	0.0938671	0.198514	0.0216265	0	0	0.0268708	0	0	0.0239813	0	0.175911		24.4006	39.3246	0	94.8008	9.21124	84.309
844	0.463681	0.0934162	0.199972	0.0196677	0	0	0.0254523	0	0	0.0240798	0	0.173731		24.2127	39.3184	0	94.9826	8.37563	85.1129
845	0.468237	0.0929883	0.201329	0.0177267	0	0	0.0240149	0	0	0.0242006	0	0.171503		24.0219	39.303	0	95.1604	7.5461	85.9156
846	0.472889	0.0925622	0.202688	0.0157986	0	0	0.0225526	0	0	0.0243217	0	0.169188		23.8293	39.2786	0	95.3352	6.72115	86.7154
847	0.4775	0.0921296	0.204029	0.013882	0	0	0.0210635	0	0	0.0244408	0	0.166955		23.6416	39.2556	0	95.5063	5.90233	87.5096
848	0.482233	0.0917039	0.205237	0.0119687	0	0	0.0195598	0	0	0.0245614	0	0.164736		23.4512	39.225	0	95.6764	5.08484	88.3082
849	0.48694	0.0912746	0.206581	0.0100664	0	0	0.0180211	0	0	0.0246976	0	0.16242		23.2644	39.193	0	95.8406	4.27316	89.0973
850	0.491692	0.0909129	0.207758	0.0081729	0	0	0.016465	0	0	0.0248147	0	0.160185		23.0789	39.1584	0	96.0044	3.46633	89.8874
851	0.496531	0.0904938	0.208973	0.00628843	0	0	0.0148871	0	0	0.0249363	0	0.15789		22.8922	39.1158	0	96.165	2.66418	90.6732
852	0.501423	0.0900685	0.210172	0.00441071	0	0	0.013283	0	0	0.025056	0	0.155587		22.7062	39.0687	0	96.3231	1.8664	91.4563
853	0.506325	0.0896465	0.211376	0.0025404	0	0	0.0116454	0	0	0.0251763	0	0.15329		22.5225	39.0198	0	96.4782	1.07363	92.2348
854	0.512309	0.0903227	0.208193	0	0	0.00319921	0.0102018	0	0	0.0253986	0	0.150376		22.3125	39.0572	0	96.7082		93.4145
855	0.516161	0.0902635	0.207058	0	0	0.0035989	0.00840547	0	0	0.025403	0	0.149109		22.1531	38.8047	0	96.7391		93.5084
856	0.519978	0.0902143	0.205946	0	0	0.00400587	0.00658604	0	0	0.0254103	0	0.147859		21.9973	38.5578	0	96.769		93.6004
857	0.523903	0.0902259	0.204801	0	0	0.00442018	0.00474341	0	0	0.0254135	0	0.146492		21.8394	38.307	0	96.7996		93.6935
858	0.527859	0.0901837	0.203558	0	0	0.00484466	0.00287957	0	0	0.0254228	0	0.145252		21.6825	38.0585	0	96.8302		93.7887
859	0.531885	0.0901209	0.202414	0	0	0.00527495	0.000993614	0	0	0.0254262	0	0.143885		21.5252	37.8076	0	96.8605		93.8809
860	0.534578	0.0902372	0.201041	0	0	0.00577083	0	0	0	0.0254379	0	0.142935		21.4218	37.6475	0	96.8837		93.9568
861	0.535889	0.0904336	0.199532	0	0	0.00633452	0	0	0	0.0254509	0	0.14236		21.373	37.578	0	96.8998		94.0132
862	0.537198	0.0906296	0.198019	0	0	0.00690434	0	0	0	0.0254638	0	0.141785		21.3244	37.5089	0	96.9158		94.0695
863	0.538505	0.0908253	0.196504	0	0	0.0074814	0	0	0	0.0254766	0	0.141207		21.2762	37.4402	0	96.9317		94.1257
864	0.539849	0.0911023	0.194854	0	0	0.00806517	0	0	0	0.025491	0	0.140639		21.2269	37.3708	0	96.9486		94.1858
865	0.541232	0.0913108	0.193215	0	0	0.00865579	0	0	0	0.0255073	0	0.14008		21.1763	37.2991	0	96.9653		94.2458
866	0.542576	0.0914968	0.191673	0	0	0.00925159	0	0	0	0.0255172	0	0.139485		21.1274	37.229	0	96.9816		94.3024
867	0.543915	0.091773	0.190014	0	0	0.00985505	0	0	0	0.0255312	0	0.138912		21.079	37.1609	0	96.9983		94.3621
868	0.545335	0.0919718	0.188347	0	0	0.0104656	0	0	0	0.0255446	0	0.138335		21.0278	37.0878	0	97.0153		94.4225
869	0.546843	0.0922011	0.186594	0	0	0.0110861	0	0	0	0.0255664	0	0.13771		20.9736	37.0105	0	97.0328		94.486
870	0.548219	0.0924678	0.184908	0	0	0.0117084	0	0	0	0.0255777	0	0.13712		20.9246	36.941	0	97.0497		94.546
871	0.549589	0.092674	0.183249	0	0	0.0123444	0	0	0	0.0255929	0	0.13655		20.876	36.8719	0	97.0661		94.6051
872	0.551043	0.0929539	0.181437	0	0	0.0129808	0	0	0	0.0256077	0	0.135978		20.8247	36.7994	0	97.0839		94.6689
873	0.552586	0.0931732	0.179651	0	0	0.0136314	0	0	0	0.0256264	0	0.135332		20.7704	36.7214	0	97.1016		94.7326
874	0.554031	0.0934516	0.17783	0	0	0.0142917	0	0	0	0.0256406	0	0.134755		20.7199	36.6501	0	97.1192		94.7961
875	0.55552	0.0936617	0.176021	0	0	0.0149538	0	0	0	0.0256568	0	0.134187		20.6681	36.5763	0	97.1367		94.8594
876	0.557063	0.0939405	0.174196	0	0	0.0156155	0	0	0	0.0256709	0	0.133514		20.6147	36.4996	0	97.1547		94.9234
877	0.558583	0.0942317	0.172242	0	0	0.0163026	0	0	0	0.0256884	0	0.132952		20.5625	36.426	0	97.173		94.9904
878	0.560108	0.0944478	0.170435	0	0	0.0169907	0	0	0	0.0257229	0	0.132295		20.5099	36.3509	0	97.1892		95.0532
879	0.561674	0.0947306	0.168461	0	0	0.0176779	0	0	0	0.025738	0	0.131718		20.4567	36.2752	0	97.2079		95.1207
880	0.563241	0.0950296	0.166512	0	0	0.0183916	0	0	0	0.0257573	0	0.131069		20.4036	36.1996	0	97.226		95.1872
881	0.564851	0.0953199	0.164544	0	0	0.0191046	0	0	0	0.0257743	0	0.130406		20.3493	36.1219	0	97.2445		95.2543
882	0.566453	0.095533	0.162571	0	0	0.0198182	0	0	0	0.0257908	0	0.129834		20.2956	36.045	0	97.2629		95.3212
883	0.568139	0.0958361	0.16047	0	0	0.0205582	0	0	0	0.025811	0	0.129186		20.2393	35.9647	0	97.2822		95.3919
884	0.569743	0.0961254	0.15849	0	0	0.0212963	0	0	0	0.0258274	0	0.128518		20.1861	35.8885	0	97.3005		95.4584
885	0.57138	0.0964203	0.156368	0	0	0.0220365	0	0	0	0.0258453	0	0.127949		20.1322	35.812	0	97.3196		95.5288
886	0.573061	0.0967226	0.154254	0	0	0.022802	0	0	0	0.025865	0	0.127295		20.0771	35.7332	0	97.3386		95.5989
887	0.574785	0.097016	0.152122	0	0	0.0235665	0	0	0	0.0258823	0	0.126628		20.0209	35.6524	0	97.358		95.6696
888	0.576549	0.0973325	0.149873	0	0	0.024349	0	0	0	0.0259056	0	0.12599		19.9637	35.5706	0	97.3777		95.7434
889	0.578289	0.0976286	0.147708	0	0	0.0251275	0	0	0	0.0259234	0	0.125323		19.9076	35.4899	0	97.3971		95.8144
890	0.58007	0.0979317	0.14546	0	0	0.0259316	0	0	0	0.025943	0	0.124664		19.8505	35.408	0	97.417		95.8876
891	0.581862	0.0982366	0.143196	0	0	0.0267373	0	0	0	0.025963	0	0.124006		19.7934	35.326	0	97.4368		95.961
892	0.583622	0.0986129	0.14089	0	0	0.0275541	0	0	0	0.0259815	0	0.123339		19.7377	35.2466	0	97.4567		96.035
893	0.585448	0.0989237	0.138565	0	0	0.028375	0	0	0	0.0260028	0	0.122685		19.6802	35.1639	0	97.4768		96.1095
894	0.587281	0.0992356	0.136208	0	0	0.0292203	0	0	0	0.0260243	0	0.12203		19.6229	35.0816	0	97.4969		96.1847
895	0.589189	0.0995603	0.133819	0	0	0.0300707	0	0	0	0.0260662	0	0.121295		19.5632	34.9956	0	97.5161		96.2608
896	0.591052	0.0999377	0.131377	0	0	0.0309265	0	0	0	0.0260846	0	0.120623		19.5057	34.9132	0	97.5368		96.3377
897	0.592989	0.100251	0.128902	0	0	0.0317874	0	0	0	0.0261062	0	0.119964		19.4461	34.8273	0	97.5577		96.4155
898	0.594839	0.100643	0.12641	0	0	0.032673	0	0	0	0.0261281	0	0.119306		19.3897	34.7468	0	97.5781		96.4929
899	0.596855	0.10097	0.123882	0	0	0.0335752	0	0	0	0.0261529	0	0.118565		19.3284	34.6578	0	97.5992		96.5719
900	0.598789	0.101359	0.121302	0	0	0.0344742	0	0	0	0.026174	0	0.117901		19.2701	34.5743	0	97.6203		96.6513
901	0.600841	0.101692	0.11871	0	0	0.0353929	0	0	0	0.0262002	0	0.117163		19.2084	34.4848	0	97.6415		96.7314
902	0.602852	0.102079	0.116041	0	0	0.0363164	0	0	0	0.0262202	0	0.116491		19.1486	34.3987	0	97.6632		96.8129
903	0.604897	0.102488	0.113361	0	0	0.0372607	0	0	0	0.0262458	0	0.115748		19.0881	34.3113	0	97.6846		96.8944
904	0.606984	0.10281	0.110635	0	0	0.0382147	0	0	0	0.026269	0	0.115087		19.0267	34.2224	0	97.7065		96.9769
905	0.609107	0.103216	0.107864	0	0	0.0391838	0	0	0	0.0262935	0	0.114335		18.9647	34.1325	0	97.7285		97.0604
906	0.611245	0.103624	0.10506	0	0	0.0401671	0	0	0	0.0263186	0	0.113585		18.9026	34.0425	0	97.7506		97.1443
907	0.613395	0.104035	0.102222	0	0	0.0411528	0	0	0	0.0263614	0	0.112834		18.8404	33.9527	0	97.7717		97.2288
908	0.615515	0.10444	0.0993267	0	0	0.0421612	0	0	0	0.0263854	0	0.112171		18.7798	33.8655	0	97.7941		97.3142
909	0.617717	0.10486	0.0964081	0	0	0.0431768	0	0	0	0.0264128	0	0.111426		18.7172	33.7746	0	97.8165		97.4001
910	0.619974	0.105272	0.0934309	0	0	0.0442144	0	0	0	0.0264383	0	0.11067		18.6534	33.6817	0	97.8393		97.4873
911	0.622227	0.105701	0.0904153	0	0	0.0452605	0	0	0	0.0264677	0	0.109929		18.5901	33.59	0	97.862		97.5751
912	0.624526	0.10612	0.0873545	0	0	0.046328	0	0	0	0.0264947	0	0.109176		18.5261	33.4967	0	97.8851		97.6637
913	0.626852	0.106545	0.0842446	0	0	0.0474108	0	0	0	0.0265226	0	0.108425		18.4617	33.403	0	97.9083		97.7531
914	0.629223	0.107055	0.0810876	0	0	0.048499	0	0	0	0.0265523	0	0.107584		18.3965	33.3079	0	97.9317		97.8435
915	0.631628	0.107476	0.0778844	0	0	0.0496076	0	0	0	0.0265792	0	0.106825		18.3309	33.212	0	97.9554		97.9347
916	0.634022	0.107912	0.0746233	0	0	0.0507366	0	0	0	0.0266271	0	0.106078		18.2659	33.1176	0	97.978		98.0268
917	0.636431	0.108413	0.071314	0	0	0.0518727	0	0	0	0.0266539	0	0.105315		18.2012	33.0235	0	98.002		98.1196
918	0.638979	0.108858	0.0679664	0	0	0.0530338	0	0	0	0.0266863	0	0.104476		18.1331	32.9233	0	98.0261		98.2133
919	0.641443	0.109368	0.0645554	0	0	0.0542018	0	0	0	0.026715	0	0.103717		18.0679	32.8284	0	98.0503		98.3079
920	0.644047	0.109824	0.0611038	0	0	0.0553956	0	0	0	0.0267494	0	0.102881		17.9994	32.7274	0	98.0747		98.4033
921	0.646601	0.110333	0.0575833	0	0	0.0565907	0	0	0	0.0267774	0	0.102115		17.9328	32.6301	0	98.0995		98.4998
922	0.649204	0.110867	0.0540211	0	0	0.0578244	0	0	0	0.0268114	0	0.101273		17.8654	32.5313	0	98.1241		98.5968
923	0.651847	0.111312	0.0503985	0	0	0.059067	0	0	0	0.0268604	0	0.100515		17.7973	32.4316	0	98.1481		98.6949
924	0.654542	0.111846	0.0467243	0	0	0.0603285	0	0	0	0.0268937	0	0.0996658		17.7286	32.3305	0	98.1733		98.7938
925	0.657277	0.112386	0.0429814	0	0	0.0616081	0	0	0	0.0269285	0	0.0988192		17.6593	32.2286	0	98.1986		98.894
926	0.660068	0.112919	0.0391792	0	0	0.0629097	0	0	0	0.0269613	0	0.0979629		17.5893	32.1251	0	98.2243		98.995
927	0.662822	0.113463	0.0353244	0	0	0.0642318	0	0	0	0.0269965	0	0.0971616		17.5207	32.0245	0	98.2499		99.0968
928	0.665673	0.114007	0.0314124	0	0	0.0655681	0	0	0	0.0270313	0	0.0963078		17.4503	31.9203	0	98.2758		99.1994
929	0.668553	0.114556	0.027429	0	0	0.0669219	0	0	0	0.0270849	0	0.0954549		17.3796	31.8161	0	98.3009		99.3032
930	0.671432	0.115184	0.0233725	0	0	0.0683021	0	0	0	0.0271205	0	0.0945886		17.3097	31.7132	0	98.3272		99.4082
931	0.674435	0.115737	0.0192591	0	0	0.0696995	0	0	0	0.0271568	0	0.0937125		17.2373	31.6056	0	98.3539		99.514
932	0.677438	0.116308	0.0150758	0	0	0.0711342	0	0	0	0.027197	0	0.0928468		17.1655	31.4992	0	98.3804		99.6208
933	0.680464	0.116945	0.0108241	0	0	0.0725757	0	0	0	0.0272338	0	0.0919569		17.0938	31.3931	0	98.4074		99.7287
934	0.683624	0.117508	0.00650161	0	0	0.0740358	0	0	0	0.0272717	0	0.0910581		17.0195	31.2821	0	98.4347		99.8376
935	0.686719	0.118158	0.00210763	0	0	0.0755268	0	0	0	0.0273286	0	0.0901602		16.9474	31.1754	0	98.4609		99.9475
936	0.689168	0.11825	0	0	0	0.0758723	0	0	0	0.0273499	0	0.0893596		16.8897	31.0809	0	98.4759		100
937	0.690954	0.117924	0	0	0	0.0751403	0	0	0	0.0273487	0	0.0886335		16.8467	31.0006	0	98.4798		100
938	0.692801	0.117528	0	0	0	0.074415	0	0	0	0.02735	0	0.0879055		16.8025	30.918	0	98.4837		100
939	0.694594	0.117203	0	0	0	0.0736837	0	0	0	0.0273491	0	0.0871705		16.7598	30.8382	0	98.4876		100
940	0.696386	0.116878	0	0	0	0.0729525	0	0	0	0.0273482	0	0.0864355		16.7173	30.7588	0	98.4915		100
941	0.69824	0.116484	0	0	0	0.0722279	0	0	0	0.0273498	0	0.0856984		16.6736	30.6771	0	98.4954		100
942	0.700041	0.11616	0	0	0	0.0714856	0	0	0	0.0273493	0	0.0849644		16.6313	30.5982	0	98.4992		100
943	0.701911	0.115768	0	0	0	0.0707505	0	0	0	0.0273514	0	0.0842191		16.5877	30.5167	0	98.503		100
944	0.703725	0.115447	0	0	0	0.0700096	0	0	0	0.0273514	0	0.083467		16.5455	30.438	0	98.5068		100
945	0.705592	0.115054	0	0	0	0.0692619	0	0	0	0.0273713	0	0.0827211		16.5022	30.3575	0	98.5097		100
946	0.707436	0.114721	0	0	0	0.068514	0	0	0	0.0273686	0	0.0819606		16.4599	30.2784	0	98.5136		100
947	0.709322	0.114331	0	0	0	0.0677681	0	0	0	0.0273713	0	0.081207		16.4167	30.1978	0	98.5174		100
948	0.711182	0.114001	0	0	0	0.0670099	0	0	0	0.0273692	0	0.0804386		16.3745	30.1189	0	98.5213		100
949	0.713105	0.113601	0	0	0	0.0662578	0	0	0	0.0273694	0	0.0796676		16.331	30.0377	0	98.5252		100
950	0.715028	0.1132	0	0	0	0.0655057	0	0	0	0.0273697	0	0.0788965		16.2877	29.9569	0	98.5291		100
951	0.716922	0.112812	0	0	0	0.0647601	0	0	0	0.0273728	0	0.0781334		16.2452	29.8777	0	98.5328		100
952	0.718804	0.112485	0	0	0	0.0639922	0	0	0	0.0273715	0	0.0773478		16.2034	29.7995	0	98.5366		100
953	0.720734	0.112086	0	0	0	0.0632407	0	0	0	0.027372	0	0.0765676		16.1606	29.7197	0	98.5405		100
954	0.722708	0.111678	0	0	0	0.0624722	0	0	0	0.0273704	0	0.0757715		16.1171	29.6385	0	98.5445		100
955	0.724641	0.111279	0	0	0	0.0617089	0	0	0	0.027389	0	0.0749816		16.0746	29.5594	0	98.5473		100
956	0.726579	0.110881	0	0	0	0.0609579	0	0	0	0.0273898	0	0.0741922		16.0323	29.4806	0	98.5511		100
957	0.728474	0.110557	0	0	0	0.0601914	0	0	0	0.0273891	0	0.0733885		15.9912	29.4039	0	98.5549		100
958	0.730455	0.11015	0	0	0	0.0594237	0	0	0	0.0273877	0	0.0725834		15.9485	29.3242	0	98.5588		100
959	0.7324	0.109753	0	0	0	0.0586733	0	0	0	0.0273888	0	0.0717848		15.9067	29.2463	0	98.5625		100
960	0.734388	0.109347	0	0	0	0.0579062	0	0	0	0.0273878	0	0.0709706		15.8643	29.1671	0	98.5664		100
961	0.736383	0.108943	0	0	0	0.0571398	0	0	0	0.027387	0	0.0701472		15.8219	29.0881	0	98.5703		100
962	0.738411	0.108477	0	0	0	0.0563837	0	0	0	0.0273911	0	0.0693364		15.7791	29.0082	0	98.5739		100
963	0.740398	0.108072	0	0	0	0.0556285	0	0	0	0.02739	0	0.0685122		15.7373	28.9304	0	98.5778		100
964	0.742387	0.107666	0	0	0	0.0548617	0	0	0	0.0274069	0	0.0676784		15.6956	28.8529	0	98.5807		100
965	0.74438	0.107261	0	0	0	0.0541072	0	0	0	0.0274061	0	0.0668451		15.6542	28.7756	0	98.5845		100
966	0.746383	0.106858	0	0	0	0.0533414	0	0	0	0.0274056	0	0.0660126		15.6128	28.6984	0	98.5882		100
967	0.748443	0.106382	0	0	0	0.0525917	0	0	0	0.0274072	0	0.0651753		15.5704	28.6194	0	98.592		100
968	0.750451	0.10598	0	0	0	0.0518383	0	0	0	0.0274069	0	0.0643236		15.5293	28.5428	0	98.5957		100
969	0.75246	0.105577	0	0	0	0.0510848	0	0	0	0.0274066	0	0.0634718		15.4885	28.4666	0	98.5994		100
970	0.754553	0.105092	0	0	0	0.0503304	0	0	0	0.0274057	0	0.0626188		15.4461	28.3877	0	98.6033		100
971	0.756559	0.104689	0	0	0	0.0495889	0	0	0	0.0274053	0	0.061757		15.4057	28.3124	0	98.607		100
972	0.758651	0.104204	0	0	0	0.0488464	0	0	0	0.0274044	0	0.0608941		15.3638	28.2343	0	98.6108		100
973	0.76066	0.103802	0	0	0	0.0480932	0	0	0	0.0274221	0	0.0600228		15.3237	28.1597	0	98.6135		100
974	0.76275	0.103316	0	0	0	0.0473626	0	0	0	0.0274211	0	0.0591499		15.2823	28.0826	0	98.6173		100
975	0.764833	0.102844	0	0	0	0.0466259	0	0	0	0.0274235	0	0.0582743		15.2412	28.0061	0	98.6209		100
976	0.766868	0.102431	0	0	0	0.0458921	0	0	0	0.0274206	0	0.0573875		15.2014	27.9318	0	98.6247		100
977	0.768966	0.101947	0	0	0	0.0451621	0	0	0	0.0274199	0	0.0565055		15.1605	27.8556	0	98.6284		100
978	0.77107	0.101464	0	0	0	0.0444326	0	0	0	0.0274194	0	0.0556141		15.1197	27.7796	0	98.6321		100
979	0.773173	0.10098	0	0	0	0.0437149	0	0	0	0.0274189	0	0.0547128		15.0791	27.704	0	98.6358		100
980	0.775223	0.10057	0	0	0	0.0429825	0	0	0	0.0274165	0	0.0538078		15.0398	27.6308	0	98.6395		100
981	0.777302	0.100084	0	0	0	0.0422756	0	0	0	0.0274331	0	0.052905		15	27.5568	0	98.6423		100
982	0.779413	0.0996015	0	0	0	0.0415585	0	0	0	0.0274329	0	0.0519944		14.9599	27.4822	0	98.6459		100
983	0.781512	0.0991177	0	0	0	0.0408648	0	0	0	0.0274323	0	0.0510733		14.9203	27.4084	0	98.6495		100
984	0.783683	0.0985628	0	0	0	0.0401628	0	0	0	0.0274342	0	0.0501568		14.8795	27.3325	0	98.6531		100
985	0.785804	0.0980692	0	0	0	0.0394651	0	0	0	0.0274309	0	0.0492308		14.8399	27.2587	0	98.6569		100
986	0.787911	0.0975865	0	0	0	0.0387718	0	0	0	0.0274305	0	0.0483003		14.8007	27.1858	0	98.6604		100
987	0.790016	0.0971036	0	0	0	0.0380904	0	0	0	0.0274301	0	0.04736		14.7618	27.1134	0	98.664		100
988	0.792142	0.0966109	0	0	0	0.0374053	0	0	0	0.027427	0	0.0464149		14.7228	27.0406	0	98.6677		100
989	0.794301	0.0960544	0	0	0	0.0367385	0	0	0	0.0274284	0	0.0454778		14.6833	26.9671	0	98.6712		100
990	0.796401	0.0955589	0	0	0	0.0360763	0	0	0	0.0274423	0	0.0445218		14.645	26.896	0	98.674		100
991	0.798596	0.0949947	0	0	0	0.0354066	0	0	0	0.0274416	0	0.0435613		14.6052	26.8221	0	98.6776		100
992	0.800687	0.0945104	0	0	0	0.0347607	0	0	0	0.0274408	0	0.0426008		14.5676	26.752	0	98.681		100
993	0.802871	0.093945	0	0	0	0.0341145	0	0	0	0.0274396	0	0.04163		14.5285	26.6793	0	98.6846		100
994	0.805054	0.0933796	0	0	0	0.0334683	0	0	0	0.0274385	0	0.0406592		14.4896	26.6069	0	98.6882		100
995	0.807163	0.0928858	0	0	0	0.0328311	0	0	0	0.0274348	0	0.0396849		14.4523	26.5374	0	98.6918		100
996	0.809343	0.0923202	0	0	0	0.0322088	0	0	0	0.0274336	0	0.0386945		14.4139	26.4659	0	98.6953		100
997	0.811514	0.0917537	0	0	0	0.0315863	0	0	0	0.0274321	0	0.0377137		14.3758	26.3951	0	98.6988		100
998	0.813677	0.0911863	0	0	0	0.0309755	0	0	0	0.0274482	0	0.0367129		14.338	26.3249	0	98.7015		100
999	0.815854	0.0906206	0	0	0	0.0303653	0	0	0	0.0274469	0	0.0357128		14.3003	26.2547	0	98.705		100
1000	0.818022	0.090054	0	0	0	0.0297667	0	0	0	0.0274453	0	0.0347124		14.2629	26.1851	0	98.7084		100

## Sheet: 0.7 GPa
Temperature (°C)	Model fraction of minerals (wt%)											CW in melt (ppm)	CSn in melt (ppm)	Model fraction of W in Mus (wt%)	Model fraction of W in melt (wt%)	Model fraction of Sn in Bi (wt%)	Model fraction of Sn in melt (wt%)
	Melt	Cd	G	Bi	Mus	Ksp	Pl	Ilm	Sill	Q	H2O
650	0	0	0	0.332722	0.114374	0	0.040632	0.0136483	0.030197	0.465262	0.00316547	0	0	0	0	0	0
651	0	0	0	0.332912	0.113782	0	0.0409019	0.0135936	0.0303315	0.465283	0.00319584	0	0	0	0	0	0
652	0	0	0	0.333103	0.113258	0	0.041159	0.0135345	0.030468	0.465252	0.00322484	0	0	0	0	0	0
653	0	0	0	0.33323	0.112748	0	0.0414116	0.0134789	0.0305969	0.46528	0.0032539	0	0	0	0	0	0
654	0	0	0	0.333361	0.112239	0	0.0416552	0.0134217	0.0307261	0.465314	0.00328229	0	0	0	0	0	0
655	0	0	0	0.333528	0.111743	0	0.0419032	0.0133659	0.0308471	0.465303	0.00331068	0	0	0	0	0	0
656	0	0	0	0.333663	0.111235	0	0.0421474	0.0133089	0.0309652	0.465342	0.00333806	0	0	0	0	0	0
657	0	0	0	0.333801	0.110729	0	0.0423727	0.0132519	0.0310951	0.465385	0.00336546	0	0	0	0	0	0
658	0	0	0	0.33398	0.110304	0	0.0425993	0.0131924	0.0311959	0.465337	0.00339114	0	0	0	0	0	0
659	0	0	0	0.334122	0.109798	0	0.0428252	0.0131356	0.0313147	0.465386	0.00341752	0	0	0	0	0	0
660	0	0	0	0.334269	0.109398	0	0.043042	0.0130789	0.0314223	0.465347	0.00344359	0	0	0	0	0	0
661	0	0	0	0.334415	0.108894	0	0.0432589	0.0130206	0.0315416	0.465401	0.00346896	0	0	0	0	0	0
662	0	0	0	0.334533	0.108484	0	0.0434626	0.0129628	0.0316466	0.465417	0.00349368	0	0	0	0	0	0
663	0	0	0	0.334687	0.107982	0	0.0436805	0.0129064	0.0317435	0.465482	0.00351878	0	0	0	0	0	0
664	0	0	0	0.33488	0.107561	0	0.0438704	0.0128474	0.0318455	0.465453	0.00354245	0	0	0	0	0	0
665	0	0	0	0.335007	0.107154	0	0.0440655	0.0127882	0.0319398	0.46548	0.0035662	0	0	0	0	0	0
666	0	0	0	0.335129	0.106745	0	0.0442602	0.0127306	0.0320453	0.465502	0.00358812	0	0	0	0	0	0
667	0	0	0	0.335286	0.106347	0	0.0444594	0.0126743	0.0321425	0.465477	0.00361363	0	0	0	0	0	0
668	0	0	0	0.335451	0.105848	0	0.0446501	0.0126166	0.0322406	0.465558	0.00363566	0	0	0	0	0	0
669	0	0	0	0.335585	0.105443	0	0.0448368	0.0125593	0.0323241	0.465595	0.00365736	0	0	0	0	0	0
670	0.00939302	0	0	0.335175	0.102633	0	0.0421186	0.0124676	0.0330371	0.462558	0.00261736	9.47472	17.3137	88.1105	0.752929	62.8535	0.759233
671	0.0184526	0	0	0.334746	0.0998192	0	0.0395742	0.0123794	0.0337562	0.459651	0.00162181	9.63921	17.3855	87.1821	1.50481	63.0335	1.49771
672	0.0269165	0	0	0.334433	0.0970885	0	0.0372594	0.0122918	0.0344508	0.456859	0.000700818	9.80668	17.4558	86.2704	2.23318	63.229	2.1935
673	0.0335109	0	0	0.334151	0.0948059	0	0.0355598	0.0122094	0.0350313	0.454732	0	9.95532	17.5204	85.519	2.82243	63.4097	2.74101
674	0.0339587	0	0	0.334343	0.0941418	0	0.0356246	0.0121338	0.0351899	0.454609	0	10.0111	17.5465	85.396	2.87618	63.5406	2.78178
675	0.0344138	0	0	0.334499	0.0934975	0	0.0356969	0.0120607	0.0353445	0.454488	0	10.0658	17.5725	85.2746	2.93064	63.6644	2.82323
676	0.0348708	0	0	0.334687	0.0928325	0	0.0357613	0.0119849	0.0355028	0.454361	0	10.1228	17.5988	85.148	2.9864	63.7956	2.86501
677	0.0353442	0	0	0.334833	0.0921853	0	0.0358326	0.0119097	0.0356679	0.454227	0	10.1789	17.6252	85.0225	3.04369	63.9192	2.90826
678	0.0358142	0	0	0.335053	0.091529	0	0.0358908	0.0118351	0.0358295	0.454049	0	10.2362	17.6499	84.8924	3.10153	64.0509	2.95106
679	0.0362942	0	0	0.335171	0.0908739	0	0.0359399	0.0117589	0.0359916	0.45397	0	10.2943	17.678	84.7633	3.16095	64.1755	2.99538
680	0.0367739	0	0	0.335392	0.0902074	0	0.0359982	0.0116825	0.0361533	0.453793	0	10.3538	17.7034	84.6281	3.22124	64.3097	3.03932
681	0.0372728	0	0	0.335507	0.0895412	0	0.036047	0.0116062	0.0363152	0.453711	0	10.4142	17.7321	84.4931	3.28399	64.4363	3.08556
682	0.0377714	0	0	0.335725	0.0888739	0	0.0360955	0.0115281	0.0364766	0.45353	0	10.475	17.7575	84.3533	3.34735	64.5706	3.13131
683	0.0382744	0	0	0.335875	0.0882168	0	0.0361384	0.0114529	0.0366423	0.453401	0	10.5358	17.7847	84.215	3.41159	64.6983	3.17787
684	0.0387886	0	0	0.336061	0.0875309	0	0.0361739	0.0113737	0.0368003	0.453271	0	10.5999	17.8124	84.0689	3.47847	64.835	3.22557
685	0.0393101	0	0	0.336205	0.0868616	0	0.0362163	0.0112967	0.0369768	0.453134	0	10.6632	17.8404	83.9242	3.54629	64.9648	3.27409
686	0.0398465	0	0	0.336417	0.0861825	0	0.0362545	0.0112166	0.0371377	0.452945	0	10.7279	17.8666	83.7731	3.61648	65.1013	3.32363
687	0.0403878	0	0	0.336565	0.0854934	0	0.0362877	0.0111396	0.0373146	0.452812	0	10.7946	17.8957	83.6201	3.68841	65.2359	3.37427
688	0.0409395	0	0	0.336745	0.0847856	0	0.0363129	0.0110585	0.0374835	0.452675	0	10.8639	17.9249	83.4605	3.76281	65.3771	3.42593
689	0.0415086	0	0	0.336884	0.0840939	0	0.0363451	0.0109795	0.0376595	0.45253	0	10.9324	17.9542	83.3014	3.83915	65.5111	3.47924
690	0.0420742	0	0	0.3371	0.0833746	0	0.0363743	0.0108979	0.0378323	0.452346	0	11.0045	17.9827	83.1335	3.91714	65.6574	3.53226
691	0.0426723	0	0	0.337239	0.0826623	0	0.0363969	0.0108189	0.0380084	0.452202	0	11.0767	18.0132	82.9644	3.9989	65.7957	3.58854
692	0.0432659	0	0	0.337449	0.0819309	0	0.0364157	0.0107371	0.038192	0.45201	0	11.1519	18.0426	82.7879	4.08202	65.944	3.64439
693	0.0438782	0	0	0.337656	0.0811885	0	0.0364342	0.0106551	0.0383752	0.451813	0	11.2291	18.0726	82.6058	4.16846	66.0941	3.70211
694	0.0445049	0	0	0.337793	0.0804446	0	0.0364567	0.0105726	0.0385627	0.451666	0	11.3077	18.105	82.4219	4.2576	66.2395	3.76173
695	0.0451457	0	0	0.337996	0.0796809	0	0.0364653	0.0104889	0.0387571	0.451466	0	11.3893	18.1363	82.2286	4.35006	66.3941	3.82249
696	0.0458148	0	0	0.338162	0.0789127	0	0.0364813	0.0104072	0.0389593	0.451263	0	11.4725	18.1689	82.0305	4.44677	66.546	3.88611
697	0.0464844	0	0	0.338367	0.0781182	0	0.0364899	0.0103235	0.0391539	0.451063	0	11.5599	18.2019	81.8233	4.54614	66.7073	3.95008
698	0.0471723	0	0	0.338565	0.0773121	0	0.0364979	0.0102379	0.0393591	0.450856	0	11.6499	18.2358	81.6095	4.64934	66.8706	4.01599
699	0.0478894	0	0	0.338728	0.0765016	0	0.0365041	0.0101544	0.0395728	0.450649	0	11.7416	18.2709	81.3901	4.7572	67.0315	4.08488
700	0.0486148	0	0	0.33892	0.0756631	0	0.0365114	0.0100686	0.0397888	0.450433	0	11.8382	18.3067	81.16	4.86897	67.2012	4.15489
701	0.0493644	0	0	0.339148	0.074812	0	0.0365129	0.00998383	0.040009	0.45017	0	11.9375	18.3419	80.9204	4.98553	67.3755	4.22707
702	0.0501483	0	0	0.339306	0.0739483	0	0.0365089	0.00989844	0.0402336	0.449957	0	12.0401	18.3801	80.6736	5.10822	67.5474	4.30313
703	0.0509398	0	0	0.339492	0.073047	0	0.0365061	0.00980908	0.040472	0.449733	0	12.1493	18.4198	80.4129	5.2359	67.7303	4.38049
704	0.0517651	0	0	0.339712	0.0721322	0	0.0365068	0.00972067	0.0407028	0.44946	0	12.2617	18.4587	80.1405	5.36995	67.9173	4.46086
705	0.0526186	0	0	0.339928	0.0711857	0	0.0364975	0.00963215	0.0409562	0.449182	0	12.3803	18.4997	79.8537	5.51126	68.1113	4.54447
706	0.053497	0	0	0.340074	0.0702262	0	0.0364922	0.00954465	0.041214	0.448952	0	12.503	18.5438	79.5584	5.65883	68.3033	4.63137
707	0.0544118	0	0	0.340313	0.0692432	0	0.0364854	0.00945506	0.0414818	0.44861	0	12.6307	18.5857	79.2455	5.81435	68.5058	4.72121
708	0.0553508	0	0	0.340524	0.068213	0	0.036466	0.00936467	0.0417576	0.448324	0	12.7677	18.6318	78.9136	5.97887	68.718	4.81459
709	0.0563321	0	0	0.340758	0.0671669	0	0.0364586	0.00927321	0.0420362	0.447975	0	12.9094	18.6775	78.566	6.15241	68.9338	4.91195
710	0.0573423	0	0	0.340885	0.0660899	0	0.0364417	0.00918175	0.042338	0.447721	0	13.0593	18.7291	78.2038	6.33546	69.1503	5.01387
711	0.0584001	0	0	0.341117	0.0649607	0	0.0364246	0.00908851	0.0426395	0.447369	0	13.2197	18.7798	77.8116	6.53157	69.3848	5.12019
712	0.0594946	0	0	0.341339	0.0638089	0	0.0363967	0.00899498	0.0429626	0.447004	0	13.3872	18.8323	77.4005	6.7383	69.6238	5.23072
713	0.0606367	0	0	0.341558	0.0626052	0	0.0363782	0.0088997	0.0432857	0.446636	0	13.567	18.8878	76.9601	6.95988	69.8739	5.34685
714	0.0618173	0	0	0.341778	0.06135	0	0.0363502	0.00880441	0.0436317	0.446268	0	13.7599	18.9467	76.4892	7.19626	70.1368	5.46794
715	0.0630679	0	0	0.342013	0.0600562	0	0.0363237	0.00870951	0.0440027	0.445827	0	13.9638	19.0068	75.9862	7.45068	70.4077	5.59626
716	0.064367	0	0	0.342251	0.0587112	0	0.0362976	0.00861125	0.0443741	0.445388	0	14.1825	19.07	75.4475	7.72322	70.6908	5.73052
717	0.0974362	0	0	0.344753	0	0.0301478	0.0243879	0.0085585	0.0639965	0.43072	0	49.5234	23.4508	0	40.8238	87.5656	10.6674
718	0.0978182	0	0	0.344745	0	0.0300195	0.0243008	0.00853096	0.0640642	0.430522	0	49.4471	23.443	0	40.9207	87.5343	10.7056
719	0.0982872	0	0	0.344704	0	0.0298976	0.0242115	0.00850263	0.0641144	0.430283	0	49.3559	23.4349	0	41.0411	87.4939	10.7532
720	0.0986901	0	0	0.344663	0	0.0297757	0.0241296	0.00847691	0.0641841	0.430081	0	49.2785	23.4284	0	41.1447	87.4593	10.7944
721	0.0991587	0	0	0.344621	0	0.0296446	0.0240402	0.00844856	0.0642456	0.429841	0	49.1881	23.4204	0	41.2642	87.4189	10.8419
722	0.0995525	0	0	0.344547	0	0.0295198	0.023956	0.00842203	0.0643094	0.429693	0	49.1157	23.4162	0	41.3671	87.3843	10.883
723	0.100022	0	0	0.344509	0	0.0293799	0.0238669	0.00839546	0.0643713	0.429456	0	49.0254	23.408	0	41.4857	87.3441	10.9305
724	0.100405	0	0	0.344504	0	0.029252	0.0237801	0.00836803	0.0644282	0.429262	0	48.9501	23.4	0	41.5806	87.3129	10.9686
725	0.100887	0	0	0.344404	0	0.0291158	0.0236844	0.00834085	0.064487	0.429081	0	48.8629	23.3953	0	41.7058	87.2698	11.019
726	0.101278	0	0	0.344427	0	0.0289903	0.0235996	0.0083158	0.0645606	0.428828	0	48.784	23.3853	0	41.8	87.2388	11.0571
727	0.10176	0	0	0.344323	0	0.0288538	0.0235133	0.00828853	0.0646188	0.428643	0	48.6978	23.3807	0	41.9244	87.1952	11.1074
728	0.10223	0	0	0.344289	0	0.0287143	0.0234245	0.00826038	0.06467	0.428412	0	48.6085	23.3722	0	42.041	87.155	11.1547
729	0.102613	0	0	0.344284	0	0.0285773	0.0233377	0.00823293	0.0647383	0.428217	0	48.5347	23.3643	0	42.1343	87.1241	11.1927
730	0.103095	0	0	0.344183	0	0.0284319	0.0232516	0.00820744	0.0647969	0.428035	0	48.4488	23.3595	0	42.2573	87.0806	11.243
731	0.103576	0	0	0.344184	0	0.0282954	0.0231556	0.00818015	0.0648549	0.427754	0	48.3555	23.3488	0	42.3727	87.0411	11.2902
732	0.103972	0	0	0.344116	0	0.0281528	0.0230717	0.00815543	0.0649197	0.427613	0	48.2846	23.3442	0	42.4723	87.0068	11.3312
733	0.104443	0	0	0.344085	0	0.0280045	0.0229831	0.00812737	0.0649715	0.427386	0	48.1964	23.3356	0	42.5868	86.9668	11.3783
734	0.104914	0	0	0.344054	0	0.0278563	0.0228946	0.00809931	0.0650234	0.427159	0	48.1086	23.327	0	42.7009	86.9269	11.4254
735	0.105406	0	0	0.343988	0	0.0277138	0.0228012	0.00807465	0.0650887	0.426927	0	48.0193	23.32	0	42.8219	86.8841	11.4756
736	0.105877	0	0	0.343957	0	0.0275656	0.0227127	0.0080466	0.0651405	0.4267	0	47.9322	23.3114	0	42.9351	86.8443	11.5226
737	0.106359	0	0	0.343856	0	0.0274202	0.0226266	0.0080211	0.0651992	0.426518	0	47.8484	23.3066	0	43.0553	86.8009	11.5727
738	0.106831	0	0	0.343828	0	0.0272632	0.0225383	0.00799312	0.0652516	0.426295	0	47.7615	23.2978	0	43.1676	86.7612	11.6197
739	0.107325	0	0	0.343765	0	0.0271118	0.0224451	0.00796853	0.0653176	0.426066	0	47.673	23.2906	0	43.2869	86.7185	11.6698
740	0.107797	0	0	0.343738	0	0.0269547	0.0223568	0.00794055	0.0653699	0.425843	0	47.5867	23.2818	0	43.3985	86.6788	11.7167
741	0.10828	0	0	0.343639	0	0.0268005	0.0222709	0.00791513	0.0654292	0.425665	0	47.5037	23.2769	0	43.5169	86.6356	11.7667
742	0.108763	0	0	0.343647	0	0.0266463	0.0221753	0.00788798	0.0654883	0.425392	0	47.4131	23.2659	0	43.6276	86.5966	11.8136
743	0.109236	0	0	0.343623	0	0.0264895	0.0220873	0.0078618	0.0655298	0.425173	0	47.3272	23.2569	0	43.7378	86.557	11.8603
744	0.109721	0	0	0.343531	0	0.0263267	0.0219922	0.00783482	0.0655904	0.425004	0	47.2443	23.2516	0	43.8552	86.5144	11.9103
745	0.110278	0	0	0.34347	0	0.0261672	0.0219018	0.00780781	0.0656363	0.424739	0	47.146	23.2428	0	43.986	86.4659	11.9662
746	0.110773	0	0	0.343411	0	0.0260069	0.0218184	0.00778327	0.0656916	0.424515	0	47.0591	23.2352	0	44.1024	86.4229	12.016
747	0.111247	0	0	0.34339	0	0.0258413	0.021721	0.00775547	0.0657451	0.4243	0	46.9742	23.2262	0	44.2109	86.384	12.0627
748	0.111741	0	0	0.343327	0	0.0256806	0.0216373	0.00773083	0.0658112	0.424072	0	46.8885	23.2189	0	44.3265	86.341	12.1125
749	0.112302	0	0	0.343279	0	0.025504	0.0215382	0.00770414	0.0658481	0.423824	0	46.7899	23.2092	0	44.4553	86.2933	12.1683
750	0.112786	0	0	0.343184	0	0.0253409	0.0214525	0.00767878	0.065908	0.42365	0	46.7093	23.2041	0	44.57	86.2503	12.2181
751	0.11337	0	0	0.343099	0	0.0251694	0.0213577	0.00765194	0.0659583	0.423394	0	46.61	23.1961	0	44.7053	86.199	12.277
752	0.113843	0	0	0.343077	0	0.0250038	0.0212603	0.00762583	0.0660117	0.423178	0	46.5266	23.1871	0	44.8116	86.1603	12.3235
753	0.114424	0	0	0.342984	0	0.0248318	0.0211747	0.00760052	0.066072	0.422913	0	46.429	23.1795	0	44.9459	86.1085	12.3823
754	0.114901	0	0	0.342973	0	0.0246488	0.0210779	0.00757465	0.0661159	0.42271	0	46.345	23.1699	0	45.0513	86.07	12.4287
755	0.115483	0	0	0.342883	0	0.0244769	0.0209829	0.00754941	0.0661769	0.422448	0	46.2477	23.1621	0	45.1846	86.0188	12.4875
756	0.116042	0	0	0.342832	0	0.0243002	0.0208933	0.00752267	0.0662131	0.422197	0	46.1523	23.1527	0	45.3097	85.9708	12.5429
757	0.116625	0	0	0.342746	0	0.0241195	0.0207985	0.0074975	0.0662747	0.421939	0	46.0554	23.1447	0	45.4418	85.9197	12.6016
758	0.117114	0	0	0.342664	0	0.0239391	0.0207039	0.00747242	0.0663256	0.421781	0	45.9754	23.1389	0	45.5531	85.8775	12.6512
759	0.117685	0	0	0.342647	0	0.0237557	0.0206069	0.00744814	0.06638	0.421477	0	45.8765	23.1273	0	45.6765	85.8303	12.7065
760	0.118257	0	0	0.342529	0	0.0235728	0.0205197	0.00742228	0.066424	0.421275	0	45.7849	23.1214	0	45.8071	85.7787	12.7651
761	0.118841	0	0	0.342443	0	0.023392	0.0204249	0.0073971	0.0664855	0.421017	0	45.6895	23.1135	0	45.9372	85.7278	12.8236
762	0.119413	0	0	0.34243	0	0.023209	0.0203281	0.00737122	0.0665293	0.420719	0	45.5913	23.1016	0	46.0592	85.6806	12.8788
763	0.120071	0	0	0.342281	0	0.0230149	0.0202295	0.0073464	0.0665787	0.420479	0	45.4881	23.0955	0	46.208	85.6209	12.9463
764	0.120657	0	0	0.342202	0	0.0228254	0.0201351	0.00732137	0.0666301	0.420229	0	45.393	23.0872	0	46.3364	85.5701	13.0048
765	0.121241	0	0	0.342118	0	0.0226357	0.0200403	0.00729795	0.0666922	0.419975	0	45.2987	23.0791	0	46.4642	85.5193	13.0632
766	0.121814	0	0	0.342109	0	0.0224438	0.0199437	0.00727214	0.0667366	0.41968	0	45.2018	23.0671	0	46.584	85.4724	13.1181
767	0.122472	0	0	0.34196	0	0.0222497	0.0198452	0.00724733	0.066786	0.41944	0	45.1004	23.0611	0	46.7303	85.4128	13.1855
768	0.123059	0	0	0.341884	0	0.0220513	0.0197509	0.00722236	0.066838	0.419195	0	45.0064	23.0525	0	46.8565	85.3622	13.2438
769	0.12373	0	0	0.341773	0	0.0218507	0.019645	0.00719838	0.066895	0.418907	0	44.9008	23.044	0	47.0016	85.3033	13.3111
770	0.124317	0	0	0.341697	0	0.0216522	0.0195507	0.0071751	0.0669469	0.418661	0	44.8076	23.0356	0	47.1266	85.2527	13.3694
771	0.124974	0	0	0.341653	0	0.0214491	0.0194521	0.00715028	0.0669961	0.418325	0	44.7009	23.0235	0	47.2627	85.1973	13.433
772	0.125647	0	0	0.341547	0	0.0212488	0.0193465	0.00712468	0.0670423	0.418043	0	44.5963	23.0148	0	47.4059	85.1385	13.5001
773	0.126305	0	0	0.341402	0	0.021046	0.0192483	0.00709996	0.0670923	0.417807	0	44.4973	23.0086	0	47.5483	85.0792	13.5672
774	0.128596	0	0.00346633	0.337697	0	0.0220653	0.0184257	0.00720478	0.0668852	0.41566	0	44.3344	23.1616	0	48.2337	84.716	13.9052
775	0.13188	0	0.00889315	0.331936	0	0.0237542	0.0172134	0.00738458	0.0665456	0.412394	0	44.1282	23.4097	0	49.2354	84.1623	14.413
776	0.13514	0	0.0142329	0.326259	0	0.0253725	0.0160503	0.00756138	0.0661995	0.409185	0	43.923	23.6582	0	50.2179	83.6013	14.9261
777	0.138379	0	0.019489	0.320675	0	0.0269113	0.0149178	0.00773699	0.0658485	0.406042	0	43.7176	23.9069	0	51.181	83.0343	15.4445
778	0.141554	0	0.0246625	0.315201	0	0.0283995	0.0138213	0.00791099	0.0655177	0.402933	0	43.5179	24.1556	0	52.1163	82.4658	15.9632
779	0.144787	0	0.0297433	0.309782	0	0.0298238	0.012763	0.00808461	0.0651742	0.399842	0	43.308	24.4042	0	53.0494	81.8822	16.4959
780	0.147927	0	0.0347533	0.304506	0	0.0311923	0.0117371	0.00825668	0.0648367	0.396791	0	43.1061	24.6511	0	53.9472	81.3019	17.0241
781	0.151151	0	0.0396901	0.299239	0	0.0325025	0.0107517	0.00842645	0.0644988	0.39374	0	42.893	24.8997	0	54.8505	80.7015	17.5706
782	0.154302	0	0.0445635	0.294045	0	0.0337618	0.00978038	0.00859914	0.0641745	0.390774	0	42.689	25.1508	0	55.7277	80.1001	18.1177
783	0.157491	0	0.0493365	0.288981	0	0.0349624	0.00884643	0.00876531	0.0638309	0.387786	0	42.4741	25.3965	0	56.593	79.4901	18.6729
784	0.160636	0	0.0540714	0.283933	0	0.0361189	0.00793801	0.00893598	0.0635117	0.384856	0	42.2671	25.6473	0	57.4416	78.8725	19.2337
785	0.163818	0	0.0587193	0.27902	0	0.0372167	0.00705212	0.00910184	0.0631626	0.381909	0	42.049	25.8921	0	58.2774	78.2477	19.802
786	0.166943	0	0.0632985	0.274093	0	0.0382863	0.00619212	0.00926813	0.0628433	0.379076	0	41.8429	26.1445	0	59.0981	77.615	20.3765
787	0.170021	0	0.0678219	0.269321	0	0.0392904	0.0053535	0.00943179	0.0625097	0.376251	0	41.637	26.3916	0	59.8915	76.9847	20.9483
788	0.17322	0	0.0722746	0.264511	0	0.0402644	0.0045369	0.00959696	0.0621784	0.373417	0	41.4181	26.6424	0	60.6976	76.3283	21.5453
789	0.176308	0	0.076669	0.259907	0	0.0411891	0.00374078	0.00976121	0.0618556	0.370569	0	41.2059	26.8856	0	61.4631	75.6844	22.1295
790	0.179481	0	0.0810082	0.255207	0	0.0420756	0.0029644	0.00992498	0.0615218	0.367817	0	40.9896	27.138	0	62.2407	75.0135	22.7393
791	0.182569	0	0.0852719	0.250646	0	0.0429194	0.00220698	0.0100876	0.0611944	0.365105	0	40.7802	27.387	0	62.9881	74.3489	23.3428
792	0.185716	0	0.0894835	0.246163	0	0.0437192	0.00146697	0.0102484	0.0608586	0.362345	0	40.5606	27.6322	0	63.729	73.6725	23.9577
793	0.188795	0	0.0936426	0.241732	0	0.0444893	0.000744217	0.0104089	0.0605342	0.359654	0	40.3502	27.8797	0	64.4493	72.9948	24.573
794	0.191954	0	0.097746	0.237304	0	0.0452208	3.76234e-05	0.0105703	0.0602087	0.356958	0	40.131	28.1287	0	65.172	72.2974	25.2074
795	0.194087	0	0.100119	0.234672	0	0.0453097	0	0.0106623	0.0599604	0.35519	0	39.968	28.2618	0	65.6284	71.8338	25.6081
796	0.196289	0	0.102405	0.232016	0	0.045358	0	0.0107513	0.0597056	0.353475	0	39.7988	28.3954	0	66.092	71.3566	26.021
797	0.198408	0	0.104724	0.229484	0	0.0454005	0	0.0108442	0.0594441	0.351695	0	39.6351	28.5223	0	66.5308	70.8933	26.4195
798	0.200599	0	0.107044	0.226829	0	0.0454385	0	0.0109376	0.0591771	0.349975	0	39.4699	28.6585	0	66.9848	70.4078	26.8388
799	0.202822	0	0.109409	0.224113	0	0.0454844	0	0.0110344	0.0589097	0.348227	0	39.3045	28.8	0	67.4433	69.9082	27.2701
800	0.205112	0	0.111774	0.22148	0	0.0455164	0	0.0111316	0.0586359	0.346351	0	39.1275	28.9328	0	67.8978	69.4052	27.7052
801	0.207401	0	0.11415	0.218747	0	0.0455485	0	0.011232	0.0583517	0.34457	0	38.9572	29.0759	0	68.3566	68.8879	28.1529
802	0.209776	0	0.116551	0.216015	0	0.0455623	0	0.0113337	0.058067	0.342696	0	38.7771	29.2167	0	68.8199	68.357	28.6133
803	0.212051	0	0.11896	0.213281	0	0.0455838	0	0.0114367	0.0577813	0.340907	0	38.6113	29.3631	0	69.2687	67.8301	29.0685
804	0.214509	0	0.121395	0.210449	0	0.0455878	0	0.011543	0.0574851	0.339031	0	38.4287	29.5126	0	69.7403	67.2702	29.5552
805	0.216885	0	0.12385	0.207737	0	0.0455949	0	0.0116515	0.0571931	0.337088	0	38.2517	29.6554	0	70.1882	66.7247	30.0271
806	0.219335	0	0.126292	0.204911	0	0.0455897	0	0.0117606	0.0568972	0.335214	0	38.073	29.8076	0	70.6494	66.1548	30.5223
807	0.22178	0	0.128758	0.202086	0	0.0455753	0	0.0118711	0.05659	0.33334	0	37.8964	29.9614	0	71.1054	65.5794	31.0216
808	0.224311	0	0.131234	0.199264	0	0.0455605	0	0.0119847	0.0562716	0.331374	0	37.7107	30.1127	0	71.5645	64.9902	31.5342
809	0.226863	0	0.133735	0.196363	0	0.045533	0	0.012101	0.0559595	0.329445	0	37.5278	30.2724	0	72.0277	64.3837	32.062
810	0.229384	0	0.136231	0.193546	0	0.0455	0	0.0122174	0.0556412	0.32748	0	37.3464	30.4268	0	72.4761	63.7835	32.5837
811	0.232001	0	0.138727	0.190635	0	0.0454508	0	0.0123355	0.0553248	0.325526	0	37.1599	30.5881	0	72.9367	63.1573	33.1301
812	0.234587	0	0.141233	0.187809	0	0.0453877	0	0.0124538	0.0549915	0.323538	0	36.9747	30.7437	0	73.3823	62.5376	33.6698
813	0.23722	0	0.143751	0.184925	0	0.0453344	0	0.0125778	0.0546595	0.321532	0	36.7884	30.9047	0	73.8321	61.8998	34.226
814	0.239906	0	0.146229	0.182017	0	0.0452568	0	0.0127014	0.0543195	0.31957	0	36.5993	31.0679	0	74.2841	61.2481	34.7963
815	0.242602	0	0.148856	0.179021	0	0.0451732	0	0.0128256	0.0539832	0.317539	0	36.4143	31.2405	0	74.7391	60.5747	35.3828
816	0.245379	0	0.151332	0.176127	0	0.0450711	0	0.0129525	0.0536349	0.315503	0	36.218	31.4016	0	75.1874	59.9028	35.9725
817	0.248083	0	0.153818	0.173253	0	0.0449731	0	0.0130837	0.0532918	0.313497	0	36.0308	31.5656	0	75.6231	59.233	36.5589
818	0.250916	0	0.156412	0.170244	0	0.0448485	0	0.0132119	0.0529382	0.311429	0	35.8371	31.7392	0	76.0753	58.5243	37.1796
819	0.253713	0	0.158897	0.167383	0	0.0447261	0	0.0133449	0.0525868	0.309349	0	35.6432	31.9009	0	76.5072	57.8341	37.7856
820	0.256546	0	0.161488	0.16439	0	0.0445772	0	0.0134765	0.052225	0.307298	0	35.4529	32.0766	0	76.9483	57.1124	38.4179
821	0.259402	0	0.164093	0.161418	0	0.0444245	0	0.0136126	0.0518583	0.305193	0	35.261	32.2505	0	77.3837	56.384	39.0561
822	0.262313	0	0.16653	0.158532	0	0.0442492	0	0.0137468	0.0514857	0.303143	0	35.0625	32.4152	0	77.8117	55.6589	39.6962
823	0.265234	0	0.169116	0.155558	0	0.0440679	0	0.0138848	0.0511165	0.301023	0	34.8682	32.5901	0	78.2421	54.9094	40.3547
824	0.268194	0	0.171583	0.152613	0	0.0438852	0	0.0140265	0.050745	0.298954	0	34.6712	32.7625	0	78.6682	54.1549	41.021
825	0.271115	0	0.174167	0.149653	0	0.0436798	0	0.0141679	0.0503675	0.29685	0	34.4804	32.9396	0	79.0877	53.3914	41.6921
826	0.274104	0	0.176734	0.146685	0	0.0434541	0	0.014308	0.0499869	0.294727	0	34.2854	33.1162	0	79.5074	52.6133	42.3776
827	0.277223	0	0.179184	0.143745	0	0.0432269	0	0.0144534	0.0496038	0.292564	0	34.079	33.2857	0	79.928	51.8227	43.0792
828	0.280215	0	0.181751	0.140793	0	0.0429778	0	0.0145986	0.0492045	0.29046	0	33.8874	33.4641	0	80.3365	51.0305	43.7775
829	0.283295	0	0.184316	0.137846	0	0.0427118	0	0.0147452	0.0488169	0.28827	0	33.6894	33.6393	0	80.7447	50.2237	44.4903
830	0.286421	0	0.186768	0.134826	0	0.0424366	0	0.014896	0.0484277	0.286225	0	33.4922	33.8238	0	81.1579	49.3929	45.2281
831	0.28957	0	0.189316	0.131881	0	0.0421434	0	0.0150447	0.0480171	0.284028	0	33.2921	33.999	0	81.5599	48.5642	45.9621
832	0.292718	0	0.191863	0.128942	0	0.0418341	0	0.0151951	0.0476079	0.281839	0	33.0942	34.1752	0	81.9564	47.7282	46.7026
833	0.295905	0	0.194294	0.126027	0	0.0415228	0	0.0153492	0.0472064	0.279695	0	32.8944	34.3493	0	82.3487	46.8867	47.4516
834	0.299147	0	0.196842	0.123001	0	0.0411815	0	0.0155046	0.0468002	0.277524	0	32.6956	34.5354	0	82.7479	46.0088	48.2313
835	0.302359	0	0.19937	0.12007	0	0.0408288	0	0.0156585	0.04638	0.275333	0	32.4986	34.7129	0	83.1325	45.1435	48.9998
836	0.305684	0	0.201769	0.117155	0	0.0404543	0	0.0158151	0.0459534	0.27317	0	32.2939	34.8852	0	83.517	44.266	49.7845
837	0.308926	0	0.204315	0.114249	0	0.0400734	0	0.0159754	0.0455295	0.270932	0	32.0979	35.0613	0	83.8906	43.3858	50.5665
838	0.312341	0	0.206715	0.111244	0	0.0396755	0	0.0161354	0.0451057	0.268783	0	31.8933	35.2438	0	84.2774	42.4648	51.3917
839	0.315645	0	0.209241	0.108339	0	0.0392587	0	0.0163023	0.0446801	0.266534	0	31.6967	35.4202	0	84.6439	41.5627	52.1951
840	0.319059	0	0.211639	0.105447	0	0.0388286	0	0.0164686	0.0442477	0.26431	0	31.4933	35.5912	0	85.0104	40.6485	53.0146
841	0.322437	0	0.214153	0.102447	0	0.0383779	0	0.0166331	0.0438007	0.262151	0	31.2987	35.7799	0	85.3796	39.7016	53.8598
842	0.325921	0	0.216537	0.0995493	0	0.0379133	0	0.0167984	0.0433572	0.259924	0	31.0949	35.9513	0	85.7401	38.7634	54.7027
843	0.329399	0	0.219057	0.096625	0	0.037432	0	0.0169634	0.0429141	0.25761	0	30.8946	36.1272	0	86.097	37.8087	55.5568
844	0.332899	0	0.22145	0.0937122	0	0.0369372	0	0.0171295	0.0424642	0.255408	0	30.6952	36.3031	0	86.45	36.8475	56.4204
845	0.336407	0	0.22393	0.0907822	0	0.0364175	0	0.0173075	0.0420053	0.253151	0	30.4976	36.4819	0	86.7986	35.8712	57.2958
846	0.339998	0	0.226324	0.0878802	0	0.035891	0	0.0174738	0.0415579	0.250874	0	30.2957	36.6541	0	87.1446	34.8885	58.1807
847	0.343624	0	0.228682	0.0849591	0	0.0353342	0	0.0176532	0.0410942	0.248653	0	30.0942	36.829	0	87.4881	33.8897	59.0819
848	0.347227	0	0.231164	0.082048	0	0.0347679	0	0.0178315	0.0406291	0.246332	0	29.8965	37.0043	0	87.8246	32.8843	59.9854
849	0.350889	0	0.233546	0.0791462	0	0.0341832	0	0.0180128	0.0401613	0.244062	0	29.6968	37.1772	0	88.1581	31.8695	60.9013
850	0.35458	0	0.235886	0.0762356	0	0.0335767	0	0.018191	0.0396877	0.241843	0	29.4981	37.3517	0	88.4894	30.8416	61.8307
851	0.358288	0	0.238379	0.0733343	0	0.0329563	0	0.01837	0.0392066	0.239466	0	29.3002	37.5236	0	88.8146	29.8044	62.7649
852	0.362073	0	0.240723	0.0704355	0	0.032319	0	0.0185485	0.0387253	0.237176	0	29.0996	37.6934	0	89.1386	28.7558	63.715
853	0.36586	0	0.243068	0.0675422	0	0.0316577	0	0.018743	0.0382348	0.234894	0	28.9011	37.8638	0	89.4564	27.6993	64.6724
854	0.369635	0	0.245546	0.064642	0	0.0309883	0	0.018921	0.0377442	0.232524	0	28.7064	38.0361	0	89.7706	26.6305	65.6371
855	0.373484	0	0.247873	0.0617441	0	0.0302935	0	0.0191141	0.0372533	0.230238	0	28.5091	38.2065	0	90.082	25.5506	66.6176
856	0.37743	0	0.250206	0.0588527	0	0.0295752	0	0.0193076	0.0367537	0.227875	0	28.3077	38.3707	0	90.3907	24.4587	67.6108
857	0.381384	0	0.252545	0.0559574	0	0.0288421	0	0.0195015	0.0362454	0.225525	0	28.1087	38.5363	0	90.6956	23.3559	68.614
858	0.38534	0	0.254885	0.053067	0	0.0280935	0	0.0196956	0.0357384	0.223181	0	27.9122	38.7025	0	90.9958	22.245	69.6247
859	0.389295	0	0.257305	0.0501595	0	0.0273229	0	0.0199009	0.0352243	0.220792	0	27.7185	38.8721	0	91.2917	21.1184	70.6476
860	0.393349	0	0.259652	0.0472798	0	0.0265355	0	0.0200954	0.0347098	0.218379	0	27.5208	39.0325	0	91.5846	19.9881	71.678
861	0.39743	0	0.261957	0.0443772	0	0.0257282	0	0.0203026	0.0341803	0.216024	0	27.3246	39.1968	0	91.875	18.8399	72.7263
862	0.40155	0	0.264289	0.0414836	0	0.0248997	0	0.0205118	0.0336553	0.21361	0	27.1284	39.3578	0	92.1609	17.6838	73.7821
863	0.405673	0	0.266704	0.038586	0	0.0240504	0	0.0207166	0.0331136	0.211156	0	26.9349	39.5196	0	92.4428	16.5162	74.8462
864	0.40986	0	0.269023	0.0356895	0	0.0231813	0	0.0209246	0.0325785	0.208743	0	26.7403	39.6792	0	92.7222	15.3381	75.924
865	0.414104	0	0.271321	0.0327948	0	0.0222866	0	0.0211311	0.0320421	0.20632	0	26.5451	39.8359	0	92.9986	14.1497	77.0132
866	0.418352	0	0.273623	0.029895	0	0.0213852	0	0.0213536	0.0314859	0.203905	0	26.3523	39.9944	0	93.2701	12.9499	78.1127
867	0.422638	0	0.27603	0.0269866	0	0.0204492	0	0.0215735	0.0309378	0.201385	0	26.1601	40.1516	0	93.5384	11.736	79.2231
868	0.427048	0	0.278322	0.0240753	0	0.0194998	0	0.0217951	0.0303722	0.198888	0	25.9639	40.3027	0	93.8055	10.5093	80.3509
869	0.431462	0	0.280618	0.0211686	0	0.0185269	0	0.022017	0.0298081	0.1964	0	25.7702	40.4538	0	94.0682	9.27515	81.4858
870	0.435881	0	0.282918	0.0182566	0	0.0175389	0	0.0222391	0.0292456	0.19392	0	25.5792	40.6066	0	94.3275	8.02944	82.6314
871	0.440305	0	0.285303	0.0153358	0	0.0165158	0	0.0224728	0.0286575	0.19141	0	25.3906	40.7608	0	94.5822	6.77044	83.7871
872	0.444881	0	0.287591	0.0124218	0	0.0154799	0	0.0226939	0.0280855	0.188847	0	25.1969	40.9044	0	94.836	5.5033	84.9561
873	0.449407	0	0.289986	0.00949309	0	0.0144273	0	0.0229282	0.0274902	0.186269	0	25.0085	41.0543	0	95.0847	4.22119	86.1349
874	0.454055	0	0.292266	0.00656162	0	0.0133439	0	0.0231642	0.0268983	0.183711	0	24.8169	41.1978	0	95.332	2.92788	87.3299
875	0.458755	0	0.294522	0.00362506	0	0.0122445	0	0.0234141	0.0262949	0.181145	0	24.6254	41.3395	0	95.5754	1.62311	88.5373
876	0.463447	0	0.296913	0.000682368	0	0.0111215	0	0.0236478	0.0256923	0.178496	0	24.4374	41.4821	0	95.8158	0.306583	89.7515
877	0.466787	0	0.297178	0	0	0.00973097	0	0.0237098	0.0254052	0.177189	0	24.2817	41.3434	0	95.8916	0	90.0961
878	0.469695	0	0.296898	0	0	0.00825027	0	0.0237095	0.0252141	0.176233	0	24.138	41.1223	0	95.918	0	90.1724
879	0.47266	0	0.2966	0	0	0.00675661	0	0.0237076	0.0250107	0.175265	0	23.9933	40.8994	0	95.9448	0	90.2497
880	0.475692	0	0.296261	0	0	0.00524983	0	0.0237134	0.0248155	0.174268	0	23.847	40.6742	0	95.9715	0	90.3287
881	0.478672	0	0.295971	0	0	0.00372612	0	0.0237123	0.0246128	0.173306	0	23.705	40.455	0	95.9977	0	90.4046
882	0.481812	0	0.295589	0	0	0.00218698	0	0.0237147	0.0244139	0.172283	0	23.5573	40.2272	0	96.0252	0	90.4853
883	0.484852	0	0.295283	0	0	0.000632491	0	0.0237121	0.0242099	0.171311	0	23.416	40.0086	0	96.0515	0	90.5613
884	0.486698	0	0.294918	0	0	0	0	0.023716	0.024023	0.170645	0	23.3312	39.8781	0	96.0681	0	90.6096
885	0.487586	0	0.2947	0	0	0	0	0.0237205	0.0238367	0.170157	0	23.2907	39.815	0	96.0761	0	90.6314
886	0.488472	0	0.294426	0	0	0	0	0.0237206	0.0236566	0.169725	0	23.2505	39.753	0	96.0848	0	90.6547
887	0.489468	0	0.294081	0	0	0	0	0.0237261	0.0234817	0.169243	0	23.2055	39.684	0	96.0944	0	90.6818
888	0.490357	0	0.293863	0	0	0	0	0.0237306	0.0232953	0.168755	0	23.1654	39.6215	0	96.1024	0	90.7034
889	0.491316	0	0.293495	0	0	0	0	0.0237342	0.0231079	0.168347	0	23.1224	39.5559	0	96.1119	0	90.7304
890	0.492319	0	0.293153	0	0	0	0	0.0237399	0.0229224	0.167866	0	23.0776	39.4871	0	96.1214	0	90.7573
891	0.493211	0	0.292882	0	0	0	0	0.0237403	0.0227317	0.167435	0	23.038	39.4256	0	96.13	0	90.7802
892	0.494259	0	0.292514	0	0	0	0	0.0237439	0.0225441	0.16694	0	22.9915	39.3543	0	96.1401	0	90.8085
893	0.495194	0	0.292269	0	0	0	0	0.0237463	0.0223554	0.166436	0	22.9501	39.2898	0	96.1486	0	90.8313
894	0.496168	0	0.291908	0	0	0	0	0.0237349	0.0221577	0.166031	0	22.9076	39.2242	0	96.1591	0	90.8579
895	0.497177	0	0.291569	0	0	0	0	0.0237408	0.0219615	0.165552	0	22.8633	39.1559	0	96.1685	0	90.8844
896	0.498231	0	0.291203	0	0	0	0	0.0237447	0.0217632	0.165058	0	22.8173	39.0851	0	96.1785	0	90.9123
897	0.49923	0.000438023	0.29058	0	0	0	0	0.0237501	0.0214282	0.164574	0	22.7743	39.0216	0	96.1896	0	90.9464
898	0.500232	0.00087884	0.290011	0	0	0	0	0.0237598	0.0210863	0.164033	0	22.7312	38.9574	0	96.2	0	90.9791
899	0.501303	0.00132266	0.289291	0	0	0	0	0.0237686	0.0207432	0.163572	0	22.6854	38.8903	0	96.212	0	91.0169
900	0.502349	0.00176728	0.288643	0	0	0	0	0.023772	0.0203952	0.163073	0	22.6409	38.8244	0	96.2237	0	91.0523
901	0.503468	0.00221621	0.28795	0	0	0	0	0.023783	0.020043	0.16254	0	22.5934	38.7541	0	96.2356	0	91.0899
902	0.504469	0.00266667	0.287325	0	0	0	0	0.0237884	0.0196964	0.162054	0	22.5511	38.6915	0	96.2466	0	91.1236
903	0.505588	0.00312067	0.286629	0	0	0	0	0.0237993	0.0193435	0.161519	0	22.504	38.6217	0	96.2584	0	91.1611
904	0.506706	0.00357707	0.285881	0	0	0	0	0.023806	0.0189869	0.161042	0	22.4572	38.5529	0	96.2708	0	91.1998
905	0.507752	0.00403645	0.28528	0	0	0	0	0.0238292	0.0186199	0.160482	0	22.4132	38.4876	0	96.2805	0	91.2332
906	0.508875	0.00449776	0.284533	0	0	0	0	0.0238361	0.0182524	0.160006	0	22.3666	38.4189	0	96.2929	0	91.2718
907	0.509998	0.00496281	0.283836	0	0	0	0	0.0238471	0.0178877	0.159469	0	22.3201	38.3499	0	96.3045	0	91.3088
908	0.511164	0.00543041	0.283111	0	0	0	0	0.0238559	0.0175211	0.158918	0	22.272	38.2784	0	96.3168	0	91.3472
909	0.512285	0.00590044	0.282361	0	0	0	0	0.0238626	0.0171526	0.158439	0	22.2261	38.2107	0	96.329	0	91.3854
910	0.513456	0.00637396	0.281637	0	0	0	0	0.0238715	0.0167749	0.157887	0	22.1782	38.1394	0	96.3412	0	91.4235
911	0.514626	0.00685044	0.280912	0	0	0	0	0.0238805	0.0163969	0.157335	0	22.1306	38.0685	0	96.3533	0	91.4615
912	0.51575	0.00732924	0.280161	0	0	0	0	0.0238872	0.0160171	0.156855	0	22.0851	38.0013	0	96.3654	0	91.4993
913	0.516925	0.00781167	0.279436	0	0	0	0	0.0238963	0.0156279	0.156303	0	22.0376	37.9306	0	96.3774	0	91.5371
914	0.51817	0.00829908	0.27861	0	0	0	0	0.0239085	0.0152405	0.155772	0	21.9876	37.8565	0	96.3903	0	91.5786
915	0.519344	0.00878838	0.277882	0	0	0	0	0.0239175	0.0148506	0.155218	0	21.9407	37.7865	0	96.4022	0	91.6161
916	0.520559	0.00928069	0.277128	0	0	0	0	0.0239242	0.0144591	0.154649	0	21.8923	37.7142	0	96.4147	0	91.6549
917	0.52181	0.0097756	0.276301	0	0	0	0	0.0239366	0.01406	0.154117	0	21.8427	37.6407	0	96.4275	0	91.696
918	0.522982	0.0102764	0.275523	0	0	0	0	0.0239413	0.013656	0.153621	0	21.7965	37.5721	0	96.4399	0	91.7345
919	0.524231	0.0107809	0.274692	0	0	0	0	0.0239535	0.0132561	0.153087	0	21.7475	37.4993	0	96.4526	0	91.7754
920	0.525529	0.011285	0.273839	0	0	0	0	0.0239639	0.0128441	0.15254	0	21.6967	37.4238	0	96.4658	0	91.8174
921	0.526755	0.0117878	0.273086	0	0	0	0	0.0239709	0.0124299	0.151971	0	21.649	37.3522	0	96.478	0	91.8555
922	0.52805	0.0123014	0.272229	0	0	0	0	0.0239811	0.0120171	0.151422	0	21.5988	37.2775	0	96.4911	0	91.8973
923	0.529342	0.012824	0.271369	0	0	0	0	0.023991	0.0116039	0.150871	0	21.549	37.2034	0	96.5042	0	91.939
924	0.530687	0.0133484	0.270535	0	0	0	0	0.0240034	0.0111806	0.150246	0	21.4973	37.1259	0	96.5172	0	91.9805
925	0.531987	0.0138721	0.269676	0	0	0	0	0.0240136	0.010756	0.149696	0	21.4477	37.0518	0	96.5302	0	92.0219
926	0.533335	0.0143951	0.268795	0	0	0	0	0.024022	0.0103195	0.149133	0	21.3964	36.9752	0	96.5436	0	92.0644
927	0.534637	0.0149284	0.267935	0	0	0	0	0.0240322	0.00988559	0.148582	0	21.3472	36.9017	0	96.5565	0	92.1055
928	0.535984	0.0154609	0.267052	0	0	0	0	0.0240404	0.00944621	0.148017	0	21.2965	36.8258	0	96.5698	0	92.1477
929	0.537409	0.0160075	0.266111	0	0	0	0	0.0240561	0.00900611	0.14741	0	21.243	36.7459	0	96.5835	0	92.1924
930	0.538758	0.0165497	0.265225	0	0	0	0	0.0240643	0.00855845	0.146844	0	21.1927	36.6706	0	96.5967	0	92.2343
931	0.540104	0.0171009	0.264338	0	0	0	0	0.0240724	0.00810721	0.146278	0	21.1428	36.5958	0	96.6099	0	92.2761
932	0.541577	0.0176566	0.263371	0	0	0	0	0.024086	0.00765314	0.145656	0	21.0883	36.5142	0	96.6239	0	92.3215
933	0.543005	0.0182114	0.262381	0	0	0	0	0.0240977	0.00719471	0.14511	0	21.0359	36.436	0	96.6379	0	92.3667
934	0.544396	0.0187742	0.261511	0	0	0	0	0.0241235	0.00673104	0.144464	0	20.9848	36.3592	0	96.6499	0	92.4081
935	0.545863	0.0193457	0.260494	0	0	0	0	0.0241328	0.00626251	0.143902	0	20.9315	36.2796	0	96.6643	0	92.4542
936	0.547346	0.0199127	0.259525	0	0	0	0	0.0241467	0.00579041	0.143279	0	20.8777	36.1988	0	96.6781	0	92.499
937	0.548815	0.020494	0.258505	0	0	0	0	0.024156	0.00531351	0.142717	0	20.8249	36.1198	0	96.6923	0	92.5447
938	0.5503	0.021071	0.257534	0	0	0	0	0.0241698	0.00483285	0.142092	0	20.7717	36.0396	0	96.706	0	92.5892
939	0.551772	0.0216621	0.256513	0	0	0	0	0.0241791	0.0043454	0.141528	0	20.7193	35.9612	0	96.7202	0	92.6347
940	0.5533	0.0222472	0.255517	0	0	0	0	0.0241909	0.00385473	0.14089	0	20.6651	35.8794	0	96.7342	0	92.68
941	0.554901	0.0228534	0.254412	0	0	0	0	0.0242057	0.00335968	0.140269	0	20.6086	35.7947	0	96.7491	0	92.7288
942	0.556432	0.0234485	0.253414	0	0	0	0	0.0242174	0.00285933	0.139629	0	20.5549	35.7135	0	96.7631	0	92.7738
943	0.558027	0.0240606	0.252261	0	0	0	0	0.024228	0.00235297	0.13907	0	20.4994	35.6305	0	96.7784	0	92.8234
944	0.559562	0.0246657	0.251261	0	0	0	0	0.0242398	0.00184301	0.138429	0	20.4461	35.5498	0	96.7922	0	92.868
945	0.561169	0.0252923	0.250151	0	0	0	0	0.0242546	0.0013273	0.137805	0	20.3906	35.4664	0	96.8068	0	92.9162
946	0.562822	0.0259175	0.249019	0	0	0	0	0.0242675	0.000806127	0.137169	0	20.3339	35.3809	0	96.8219	0	92.9652
947	0.564478	0.0265435	0.247886	0	0	0	0	0.0242804	0.000279844	0.136532	0	20.2774	35.2957	0	96.8369	0	93.0141
948	0.565973	0.026692	0.247103	0	0	0	0	0.0242864	0	0.135945	0	20.2264	35.2167	0	96.8493	0	93.0518
949	0.567528	0.0263197	0.246487	0	0	0	0	0.0242949	0	0.135371	0	20.1734	35.133	0	96.8608	0	93.0856
950	0.568958	0.0259324	0.245956	0	0	0	0	0.0242981	0	0.134856	0	20.1249	35.0559	0	96.8714	0	93.1156
951	0.570434	0.025556	0.245444	0	0	0	0	0.0243031	0	0.134262	0	20.075	34.9764	0	96.882	0	93.1455
952	0.571941	0.0251808	0.244804	0	0	0	0	0.0243095	0	0.133765	0	20.0244	34.8968	0	96.8933	0	93.1789
953	0.573457	0.0248018	0.24427	0	0	0	0	0.0243124	0	0.133159	0	19.9737	34.816	0	96.9042	0	93.2096
954	0.575011	0.024437	0.243649	0	0	0	0	0.0243207	0	0.132582	0	19.9221	34.7343	0	96.9155	0	93.2427
955	0.576477	0.0240557	0.243093	0	0	0	0	0.0243214	0	0.132053	0	19.8736	34.6573	0	96.9263	0	93.2731
956	0.57807	0.0236884	0.24245	0	0	0	0	0.0243275	0	0.131464	0	19.8212	34.5743	0	96.9379	0	93.307
957	0.579622	0.0233317	0.241826	0	0	0	0	0.0243356	0	0.130885	0	19.7704	34.4938	0	96.949	0	93.3397
958	0.581217	0.022964	0.241182	0	0	0	0	0.0243417	0	0.130295	0	19.7185	34.4115	0	96.9605	0	93.3733
959	0.582756	0.0226028	0.240514	0	0	0	0	0.0243454	0	0.129782	0	19.6688	34.3329	0	96.972	0	93.4068
960	0.584468	0.0222446	0.239738	0	0	0	0	0.0243526	0	0.129197	0	19.6137	34.2463	0	96.9847	0	93.4446
961	0.586055	0.0218938	0.239089	0	0	0	0	0.0243583	0	0.128604	0	19.5629	34.1656	0	96.996	0	93.4778
962	0.587648	0.0215341	0.238441	0	0	0	0	0.0243642	0	0.128012	0	19.5121	34.085	0	97.0073	0	93.5108
963	0.589352	0.0211928	0.23766	0	0	0	0	0.0243709	0	0.127424	0	19.4582	34.0001	0	97.0198	0	93.5482
964	0.591062	0.0208425	0.236881	0	0	0	0	0.0243778	0	0.126837	0	19.4044	33.9152	0	97.0322	0	93.5854
965	0.592731	0.0205026	0.23612	0	0	0	0	0.0243867	0	0.126259	0	19.3521	33.8327	0	97.0441	0	93.6215
966	0.594354	0.0201578	0.235446	0	0	0	0	0.02439	0	0.125652	0	19.3016	33.7524	0	97.0556	0	93.6548
967	0.596141	0.0198273	0.234552	0	0	0	0	0.0243999	0	0.12508	0	19.2463	33.6657	0	97.0687	0	93.6951
968	0.597844	0.0194937	0.233767	0	0	0	0	0.0244064	0	0.124489	0	19.1939	33.5829	0	97.0809	0	93.7317
969	0.599585	0.0191582	0.23296	0	0	0	0	0.0244107	0	0.123886	0	19.1406	33.4987	0	97.0934	0	93.769
970	0.601423	0.0188374	0.232084	0	0	0	0	0.0244226	0	0.123233	0	19.0847	33.4105	0	97.1063	0	93.8088
971	0.603161	0.0185103	0.231274	0	0	0	0	0.0244267	0	0.122629	0	19.0321	33.3274	0	97.1187	0	93.8457
972	0.604943	0.0181961	0.230373	0	0	0	0	0.0244362	0	0.122052	0	18.9786	33.2432	0	97.1315	0	93.8852
973	0.606762	0.0178801	0.229452	0	0	0	0	0.0244436	0	0.121463	0	18.9242	33.1577	0	97.1446	0	93.9253
974	0.608631	0.0175741	0.228548	0	0	0	0	0.0244529	0	0.120794	0	18.8686	33.0699	0	97.1576	0	93.9653
975	0.610447	0.0172665	0.227623	0	0	0	0	0.02446	0	0.120204	0	18.815	32.9855	0	97.1706	0	94.005
976	0.612313	0.0169689	0.226715	0	0	0	0	0.0244691	0	0.119533	0	18.7601	32.8988	0	97.1835	0	94.0446
977	0.614213	0.016672	0.225677	0	0	0	0	0.0244794	0	0.118958	0	18.7047	32.812	0	97.1971	0	94.0875
978	0.616112	0.0163813	0.224746	0	0	0	0	0.0244861	0	0.118274	0	18.6496	32.7248	0	97.2102	0	94.1276
979	0.618009	0.0160927	0.223705	0	0	0	0	0.0244962	0	0.117697	0	18.5949	32.639	0	97.2237	0	94.1701
980	0.619993	0.0158127	0.22266	0	0	0	0	0.0245062	0	0.117028	0	18.5381	32.5495	0	97.2375	0	94.2133
981	0.621978	0.0155325	0.221614	0	0	0	0	0.0245161	0	0.116359	0	18.4815	32.4604	0	97.2513	0	94.2562
982	0.623903	0.0152595	0.220546	0	0	0	0	0.0245236	0	0.115768	0	18.4271	32.3749	0	97.2649	0	94.2989
983	0.62588	0.0149965	0.219495	0	0	0	0	0.0245331	0	0.115095	0	18.3714	32.2872	0	97.2785	0	94.3415
984	0.627948	0.0147353	0.218332	0	0	0	0	0.0245461	0	0.114439	0	18.3136	32.1965	0	97.2928	0	94.3873
985	0.629923	0.0144807	0.217277	0	0	0	0	0.0245554	0	0.113764	0	18.2588	32.1099	0	97.3063	0	94.4294
986	0.63196	0.0142342	0.216069	0	0	0	0	0.0245635	0	0.113174	0	18.2026	32.0221	0	97.3208	0	94.4755
987	0.634022	0.0139901	0.214899	0	0	0	0	0.0245761	0	0.112513	0	18.146	31.9332	0	97.3349	0	94.5207
988	0.636114	0.0137533	0.213706	0	0	0	0	0.0245862	0	0.111841	0	18.089	31.8436	0	97.3493	0	94.5664
989	0.638201	0.0135252	0.21251	0	0	0	0	0.0245961	0	0.111167	0	18.0325	31.7547	0	97.3636	0	94.6119
990	0.640382	0.0132988	0.211201	0	0	0	0	0.0246096	0	0.110509	0	17.9739	31.6628	0	97.3785	0	94.6606
991	0.642468	0.0130792	0.210001	0	0	0	0	0.0246193	0	0.109833	0	17.9181	31.575	0	97.3927	0	94.7056
992	0.644699	0.0128712	0.208704	0	0	0	0	0.0246345	0	0.10909	0	17.8588	31.4818	0	97.4075	0	94.7539
993	0.646902	0.0126696	0.207367	0	0	0	0	0.024645	0	0.108417	0	17.8008	31.3907	0	97.4226	0	94.8026
994	0.649074	0.012469	0.206047	0	0	0	0	0.0246579	0	0.107752	0	17.7439	31.3014	0	97.4372	0	94.8504
995	0.651269	0.0122848	0.204703	0	0	0	0	0.024668	0	0.107076	0	17.6868	31.2118	0	97.4522	0	94.8986
996	0.653618	0.0121034	0.203262	0	0	0	0	0.0246839	0	0.106333	0	17.626	31.1165	0	97.4678	0	94.95
997	0.655811	0.0119278	0.201914	0	0	0	0	0.0246938	0	0.105654	0	17.5698	31.028	0	97.4825	0	94.9977
998	0.658094	0.0117626	0.200448	0	0	0	0	0.024707	0	0.104988	0	17.5116	30.9369	0	97.498	0	95.0486
999	0.66047	0.0115973	0.198981	0	0	0	0	0.0247202	0	0.104231	0	17.4514	30.8423	0	97.5136	0	95.0999
1000	0.662746	0.0114497	0.197508	0	0	0	0	0.024733	0	0.103562	0	17.3942	30.7526	0	97.5289	0	95.1503

## Sheet: 0.9 GPa
Temperature (°C)	Model fraction of minerals (wt%)										CW in melt (ppm)	CSn in melt (ppm)	Model fraction of W in Mus (wt%)	Model fraction of W in melt (wt%)	Model fraction of Sn in Bi (wt%)	Model fraction of Sn in melt (wt%)
	Melt	G	Bi	Mus	Ksp	Pl	Ilm	Sill	Q	H2O
650	0	0.0911794	0.228389	0.216368	0	0.0152484	0.016323	0	0.431314	0.00117821	0	0	0	0	0	0
651	0	0.0913255	0.228324	0.215904	0	0.0156427	0.0162976	0	0.431296	0.00120985	0	0	0	0	0	0
652	0	0.0914679	0.228317	0.215397	0	0.0160247	0.0162689	0	0.431283	0.00124091	0	0	0	0	0	0
653	0	0.0916151	0.228255	0.214935	0	0.0164101	0.0162436	0	0.431269	0.00127188	0	0	0	0	0	0
654	0	0.091736	0.228231	0.214512	0	0.0167815	0.0162137	0	0.431224	0.00130215	0	0	0	0	0	0
655	0	0.0918766	0.228152	0.214034	0	0.0171472	0.0161873	0	0.431271	0.00133236	0	0	0	0	0	0
656	0	0.0920076	0.228153	0.213534	0	0.0175111	0.0161592	0	0.431273	0.00136208	0	0	0	0	0	0
657	0	0.0921349	0.228181	0.213059	0	0.0178678	0.0161329	0	0.431234	0.00139127	0	0	0	0	0	0
658	0	0.0922672	0.228081	0.212662	0	0.0182227	0.016105	0	0.431242	0.00142033	0	0	0	0	0	0
659	0	0.092387	0.22809	0.212169	0	0.0185686	0.0160775	0	0.431258	0.00144907	0	0	0	0	0	0
660	0	0.0925069	0.2281	0.211677	0	0.0189147	0.0160483	0	0.431276	0.00147746	0	0	0	0	0	0
661	0	0.0926364	0.228029	0.211306	0	0.0192534	0.0160224	0	0.431247	0.00150568	0	0	0	0	0	0
662	0	0.092745	0.228046	0.210821	0	0.0195815	0.0159937	0	0.431279	0.00153344	0	0	0	0	0	0
663	0	0.0928565	0.228035	0.210409	0	0.0199165	0.0159647	0	0.431258	0.00156067	0	0	0	0	0	0
664	0	0.092966	0.228054	0.209926	0	0.0202355	0.0159362	0	0.431294	0.00158812	0	0	0	0	0	0
665	0	0.0930794	0.228047	0.209519	0	0.0205523	0.0159059	0	0.431282	0.00161469	0	0	0	0	0	0
666	0	0.0931976	0.228088	0.209055	0	0.0208733	0.0158788	0	0.431266	0.0016416	0	0	0	0	0	0
667	0	0.0932988	0.228087	0.208652	0	0.0211813	0.0158489	0	0.431264	0.00166752	0	0	0	0	0	0
668	0	0.0933868	0.228089	0.208253	0	0.0214895	0.0158191	0	0.431269	0.00169347	0	0	0	0	0	0
669	0	0.0934983	0.228113	0.207774	0	0.0217905	0.0157909	0	0.431314	0.00171923	0	0	0	0	0	0
670	0	0.0936004	0.228114	0.207374	0	0.0220894	0.0157611	0	0.431316	0.00174483	0	0	0	0	0	0
671	0	0.0936903	0.228121	0.206979	0	0.0223795	0.0157317	0	0.431329	0.00176978	0	0	0	0	0	0
672	0	0.0937802	0.228128	0.206584	0	0.0226696	0.0157023	0	0.431342	0.00179473	0	0	0	0	0	0
673	0	0.0938798	0.228158	0.20611	0	0.0229621	0.0156728	0	0.431398	0.00181952	0	0	0	0	0	0
674	0.0144404	0.0976476	0.223781	0.204237	0	0.0179552	0.015651	9.37278e-05	0.426193	0	5.13696	15.2279	95.0634	0.627578	36.909	1.0266
675	0.0150811	0.0957485	0.225767	0.201654	0	0.0185886	0.0155556	0.00108126	0.426524	0	5.19645	15.2865	94.9478	0.663014	37.3798	1.07627
676	0.015714	0.0938516	0.227869	0.198976	0	0.0191956	0.0154608	0.00205883	0.426873	0	5.25959	15.3471	94.8255	0.699231	37.8775	1.12588
677	0.0163373	0.0919466	0.22996	0.196383	0	0.0197836	0.0153649	0.00302789	0.427197	0	5.32215	15.4049	94.7031	0.735613	38.3689	1.17495
678	0.0169636	0.0900518	0.23198	0.193814	0	0.0203563	0.0152676	0.00398737	0.427579	0	5.38566	15.4639	94.5793	0.772927	38.8542	1.22466
679	0.0175785	0.0881403	0.23407	0.19121	0	0.0209077	0.0151695	0.00493952	0.427984	0	5.45159	15.5234	94.451	0.810753	39.3551	1.27395
680	0.0181855	0.0862156	0.23617	0.188711	0	0.0214513	0.0150684	0.00588281	0.428315	0	5.51628	15.5784	94.3227	0.8487	39.8489	1.3226
681	0.0187845	0.0843064	0.238282	0.186117	0	0.0219682	0.0149679	0.0068207	0.428754	0	5.58524	15.6382	94.1887	0.887616	40.3596	1.37141
682	0.0193848	0.0823824	0.240402	0.183623	0	0.022477	0.0148676	0.00775092	0.429112	0	5.65299	15.6935	94.0541	0.927088	40.8627	1.42024
683	0.0199751	0.0804508	0.242509	0.181115	0	0.0229756	0.0147645	0.008675	0.429534	0	5.72288	15.7505	93.9165	0.967133	41.3705	1.4688
684	0.0205672	0.0785066	0.244632	0.178614	0	0.0234479	0.0146604	0.00959277	0.42998	0	5.79431	15.8073	93.7754	1.00823	41.8831	1.51779
685	0.0211487	0.0765533	0.246839	0.176093	0	0.0239186	0.014555	0.0105051	0.430387	0	5.86807	15.8633	93.629	1.04993	42.4107	1.56624
686	0.0217336	0.0746074	0.248976	0.173593	0	0.0243742	0.0144495	0.0114165	0.43085	0	5.94317	15.9207	93.4807	1.09278	42.9327	1.61538
687	0.0223177	0.0726394	0.251098	0.171178	0	0.0248194	0.0143413	0.0123225	0.431284	0	6.01744	15.9749	93.332	1.13617	43.4459	1.66444
688	0.022894	0.0706716	0.253336	0.168665	0	0.0252471	0.0142335	0.0132189	0.431734	0	6.09675	16.0312	93.1741	1.18087	43.9878	1.71344
689	0.0234686	0.0686946	0.255552	0.166234	0	0.0256729	0.0141225	0.014115	0.432141	0	6.17541	16.0846	93.0157	1.22613	44.5203	1.7623
690	0.0240499	0.0667176	0.257729	0.16374	0	0.0260869	0.0140148	0.0150044	0.432657	0	6.25836	16.1426	92.851	1.27337	45.0614	1.81245
691	0.0246184	0.064712	0.259971	0.161315	0	0.0264876	0.013903	0.0158926	0.4331	0	6.341	16.1959	92.6842	1.32069	45.6035	1.86143
692	0.0251877	0.062704	0.262215	0.158889	0	0.0268888	0.0137893	0.0167818	0.433545	0	6.42595	16.2496	92.5128	1.36933	46.1498	1.91079
693	0.0257561	0.0606899	0.264446	0.156449	0	0.02727	0.0136747	0.0176597	0.434055	0	6.51371	16.3049	92.3366	1.41935	46.7009	1.96056
694	0.0263342	0.0586585	0.266782	0.154006	0	0.027642	0.0135582	0.0185497	0.43447	0	6.60387	16.3578	92.1526	1.4713	47.266	2.01106
695	0.0269104	0.0566246	0.269083	0.151497	0	0.0280121	0.0134433	0.0194343	0.434995	0	6.69928	16.4154	91.9611	1.52521	47.8417	2.0623
696	0.0274825	0.0545776	0.271339	0.149058	0	0.0283775	0.0133257	0.0203052	0.435534	0	6.79465	16.4712	91.7688	1.57981	48.4067	2.1133
697	0.0280553	0.0525137	0.273703	0.146617	0	0.0287341	0.0132048	0.0211886	0.435983	0	6.8927	16.5244	91.5686	1.63601	48.9862	2.16432
698	0.0286275	0.05043	0.276056	0.144166	0	0.0290708	0.0130847	0.0220606	0.436504	0	6.99409	16.579	91.3623	1.69394	49.5707	2.21576
699	0.0292024	0.0483477	0.278433	0.141723	0	0.0294195	0.0129621	0.0229467	0.436965	0	7.0981	16.6327	91.1496	1.75365	50.1595	2.26759
700	0.0297799	0.0462508	0.280724	0.139285	0	0.0297515	0.0128401	0.0238239	0.437545	0	7.20517	16.6893	90.9325	1.8153	50.7441	2.32028
701	0.0303645	0.0441318	0.283096	0.13683	0	0.030081	0.0127149	0.0246999	0.438083	0	7.31615	16.7446	90.7057	1.87945	51.3425	2.37368
702	0.0309438	0.042015	0.285606	0.134285	0	0.0304048	0.0125894	0.0255797	0.438576	0	7.43487	16.8011	90.4632	1.94639	51.9725	2.42712
703	0.0315308	0.0398772	0.287991	0.131827	0	0.0307264	0.0124626	0.0264586	0.439126	0	7.55321	16.857	90.221	2.01488	52.5809	2.48139
704	0.0321288	0.0377229	0.290387	0.129369	0	0.0310303	0.0123343	0.0273393	0.439688	0	7.6753	16.913	89.9702	2.08628	53.1942	2.53685
705	0.0327183	0.0355662	0.292893	0.126808	0	0.0313444	0.0122042	0.02821	0.440256	0	7.80695	16.9716	89.7016	2.161	53.8396	2.59236
706	0.0333185	0.0333775	0.295406	0.124347	0	0.0316498	0.0120725	0.0290935	0.440735	0	7.93742	17.0249	89.4304	2.23742	54.472	2.64821
707	0.0339203	0.0311867	0.297824	0.121885	0	0.0319468	0.0119391	0.0299789	0.441319	0	8.07255	17.0816	89.1523	2.31661	55.1008	2.70502
708	0.0345325	0.0289781	0.300352	0.119318	0	0.0322443	0.0118056	0.0308656	0.441905	0	8.2185	17.1411	88.8525	2.40106	55.7619	2.76343
709	0.0351424	0.0267492	0.30296	0.116737	0	0.0325297	0.0116691	0.0317621	0.442451	0	8.37055	17.1994	88.5386	2.48867	56.4375	2.82179
710	0.0357632	0.0245033	0.305473	0.114257	0	0.0328162	0.0115328	0.0326488	0.443006	0	8.52184	17.2552	88.224	2.57841	57.0902	2.88096
711	0.0363886	0.022257	0.308021	0.111683	0	0.0331065	0.011394	0.0335403	0.443609	0	8.68496	17.3156	87.8876	2.67372	57.7678	2.94159
712	0.0370212	0.0199761	0.310652	0.109097	0	0.0333847	0.0112541	0.0344414	0.444174	0	8.85514	17.3745	87.5343	2.7735	58.4595	3.00292
713	0.0376595	0.0176945	0.31322	0.10652	0	0.0336582	0.0111121	0.0353369	0.444798	0	9.03149	17.4352	87.1694	2.87751	59.1489	3.06537
714	0.0383037	0.0153927	0.315861	0.103928	0	0.0339376	0.0109685	0.0362407	0.445369	0	9.21604	17.4949	86.7855	2.98653	59.8516	3.12848
715	0.0389608	0.0130649	0.318525	0.101297	0	0.0342099	0.0108254	0.0371482	0.445969	0	9.41116	17.5564	86.3797	3.10208	60.5686	3.19332
716	0.0396196	0.0107267	0.3212	0.0986646	0	0.0344738	0.0106789	0.0380577	0.446579	0	9.61483	17.6181	85.9558	3.22281	61.2919	3.25874
717	0.0402978	0.00837145	0.323873	0.0960166	0	0.0347471	0.0105321	0.0389794	0.447182	0	9.82875	17.681	85.5099	3.35091	62.0225	3.32635
718	0.0409747	0.0059976	0.326638	0.0933387	0	0.0350092	0.010381	0.0399001	0.447761	0	10.0548	17.7431	85.0372	3.48557	62.7719	3.39412
719	0.0416671	0.00360615	0.32934	0.0906581	0	0.0352759	0.010231	0.0408271	0.448395	0	10.2919	17.8078	84.5426	3.62805	63.5219	3.46406
720	0.0423667	0.00119759	0.332125	0.0879558	0	0.0355306	0.0100782	0.0417521	0.448993	0	10.5423	17.8715	84.0179	3.7787	64.2882	3.53481
721	0.042975	0	0.333622	0.0862679	0	0.0356577	0.00996419	0.042272	0.449241	0	10.7042	17.9169	83.6711	3.89182	64.7419	3.59466
722	0.0434915	0	0.333829	0.0855978	0	0.0356571	0.0098874	0.0423977	0.449139	0	10.7686	17.9435	83.5209	3.9623	64.8786	3.64328
723	0.0440218	0	0.333963	0.084936	0	0.03566	0.00980987	0.0425276	0.449082	0	10.8331	17.9721	83.3715	4.03464	65.0079	3.69358
724	0.0445618	0	0.334203	0.0842535	0	0.0356628	0.00973232	0.0426575	0.44893	0	10.9001	17.9982	83.2129	4.10937	65.149	3.74431
725	0.0451072	0	0.334411	0.0835527	0	0.0356623	0.00965386	0.0427833	0.44883	0	10.97	18.0266	83.0498	4.18633	65.2923	3.79611
726	0.0456659	0	0.334647	0.0828486	0	0.0356648	0.00957619	0.0429243	0.448673	0	11.0409	18.054	82.882	4.26558	65.4379	3.84899
727	0.0462392	0	0.334849	0.082136	0	0.0356541	0.00949584	0.0430608	0.448564	0	11.1136	18.0832	82.7107	4.34759	65.5833	3.90361
728	0.0468315	0	0.335012	0.0814192	0	0.0356601	0.00941909	0.043206	0.448452	0	11.1878	18.1137	82.5359	4.43266	65.7258	3.96027
729	0.0474341	0	0.335219	0.0806664	0	0.0356498	0.00933885	0.0433432	0.448349	0	11.2668	18.145	82.3503	4.52141	65.88	4.01817
730	0.0480498	0	0.335449	0.0799195	0	0.0356422	0.0092593	0.0434949	0.448185	0	11.346	18.175	82.1612	4.61229	66.0342	4.07705
731	0.0486844	0	0.335677	0.0791512	0	0.0356342	0.00917795	0.0436579	0.448017	0	11.4286	18.2062	81.9642	4.70724	66.1927	4.13799
732	0.0493377	0	0.335902	0.0783719	0	0.0356259	0.00909652	0.0438204	0.447845	0	11.5136	18.2381	81.7607	4.80589	66.353	4.20086
733	0.0500056	0	0.336096	0.0775648	0	0.0356143	0.00901424	0.0439789	0.447726	0	11.6033	18.2728	81.5487	4.90887	66.5176	4.26583
734	0.0506878	0	0.336322	0.0767443	0	0.035606	0.00893281	0.044153	0.447554	0	11.6957	18.3071	81.3285	5.01546	66.6872	4.33215
735	0.0513984	0	0.336545	0.075913	0	0.0355879	0.0088496	0.0443268	0.44738	0	11.7906	18.342	81.1004	5.12705	66.8585	4.40125
736	0.0521277	0	0.336765	0.07505	0	0.0355791	0.00876631	0.0445117	0.447201	0	11.8909	18.3788	80.8606	5.24404	67.0365	4.47265
737	0.0528869	0	0.336946	0.0741916	0	0.0355678	0.00868477	0.0447056	0.447018	0	11.9922	18.4164	80.6165	5.36571	67.2098	4.54708
738	0.0536537	0	0.337159	0.0732961	0	0.0355583	0.00860129	0.0449012	0.44683	0	12.0998	18.4553	80.3586	5.49239	67.3944	4.62275
739	0.05445	0	0.337377	0.0723707	0	0.0355396	0.00851622	0.0450974	0.446649	0	12.2131	18.4957	80.0868	5.62609	67.5859	4.70165
740	0.0552786	0	0.337617	0.0714292	0	0.0355232	0.00843168	0.0453194	0.446401	0	12.3302	18.5361	79.8029	5.76648	67.7816	4.78362
741	0.056122	0	0.337829	0.0704509	0	0.035504	0.00834475	0.0455379	0.446212	0	12.4547	18.58	79.5047	5.91357	67.9846	4.86809
742	0.0570079	0	0.338066	0.0694573	0	0.0354873	0.00826014	0.0457597	0.445962	0	12.5833	18.6234	79.1923	6.06891	68.1913	4.95649
743	0.0579217	0	0.338297	0.0684314	0	0.0354701	0.00817197	0.0460038	0.445704	0	12.7189	18.6689	78.8635	6.23265	68.4049	5.04826
744	0.0588746	0	0.338532	0.0673649	0	0.0354436	0.00808558	0.0462484	0.44545	0	12.8629	18.7168	78.5138	6.40694	68.6278	5.14446
745	0.0598547	0	0.338758	0.0662655	0	0.0354258	0.00799724	0.0465147	0.445184	0	13.015	18.767	78.1457	6.59062	68.8576	5.24412
746	0.0608727	0	0.338981	0.0651347	0	0.0354076	0.00790884	0.0467806	0.444915	0	13.1752	18.819	77.7572	6.78518	69.094	5.34811
747	0.0619278	0	0.339303	0.0639612	0	0.0353791	0.00781856	0.0470686	0.444542	0	13.345	18.87	77.3407	6.99179	69.3469	5.45554
748	0.0630409	0	0.339521	0.0627366	0	0.0353508	0.00772833	0.0473569	0.444266	0	13.5276	18.9278	76.8975	7.2148	69.6041	5.57061
749	0.0864154	0	0.341752	0.0206076	0.0219063	0.0258219	0.00762759	0.0610967	0.434773	0	26.4549	21.8308	49.3975	19.341	80.807	8.80726
750	0.0969507	0	0.342813	0.00230247	0.0302829	0.0226282	0.00753314	0.0669796	0.43051	0	45.1708	23.3613	9.42375	37.0503	86.7408	10.5737
751	0.0969507	0	0.342813	0.00230247	0.0302829	0.0226282	0.00753314	0.0669796	0.43051	0	45.1708	23.3613	9.42375	37.0503	86.7408	10.5737
752	0.0988877	0	0.343187	0	0.0308525	0.0221705	0.00745059	0.0673475	0.430105	0	49.442	23.5404	0	41.3638	87.5009	10.8677
753	0.0992708	0	0.343182	0	0.0307336	0.0220741	0.00742486	0.0674042	0.42991	0	49.3653	23.5324	0	41.4597	87.47	10.9061
754	0.0997502	0	0.343071	0	0.0306239	0.0219777	0.00739915	0.0674611	0.429717	0	49.2778	23.5283	0	41.5861	87.4265	10.9568
755	0.100132	0	0.343062	0	0.0305047	0.021881	0.00737504	0.0675285	0.429517	0	49.2022	23.5206	0	41.6811	87.3957	10.9952
756	0.100613	0	0.342957	0	0.0303773	0.021785	0.00735116	0.0675865	0.42933	0	49.1144	23.5161	0	41.8066	87.3524	11.0459
757	0.100996	0	0.342953	0	0.0302584	0.0216887	0.00732543	0.0676432	0.429136	0	49.0387	23.5082	0	41.9011	87.3216	11.0842
758	0.101475	0	0.34284	0	0.0301395	0.0215922	0.0073014	0.0677114	0.42894	0	48.9525	23.5042	0	42.0258	87.2782	11.1348
759	0.101955	0	0.342838	0	0.0300118	0.021496	0.00727573	0.0677686	0.428655	0	48.8576	23.4936	0	42.1426	87.2383	11.1825
760	0.103413	0.00265419	0.340015	0	0.030972	0.0207114	0.00734527	0.0676936	0.427195	0	48.7665	23.6247	0	42.6657	87.0029	11.4057
761	0.106142	0.00857169	0.333884	0	0.0332552	0.0191094	0.00753253	0.0674591	0.424046	0	48.6533	23.9237	0	43.69	86.5151	11.8548
762	0.108753	0.0143393	0.327938	0	0.0354453	0.0175574	0.00771649	0.067216	0.421035	0	48.5509	24.2218	0	44.6703	86.0333	12.2978
763	0.111468	0.0199716	0.322061	0	0.0375529	0.0160606	0.00789603	0.0669841	0.418005	0	48.4238	24.5198	0	45.6659	85.5311	12.7599
764	0.114075	0.0254518	0.316397	0	0.0395711	0.0146149	0.00807295	0.0667609	0.415057	0	48.3035	24.8142	0	46.6177	85.0356	13.2151
765	0.116583	0.0308134	0.310867	0	0.0415218	0.0132121	0.00824797	0.0665295	0.412226	0	48.1935	25.1094	0	47.5342	84.5433	13.6663
766	0.119185	0.036058	0.305366	0	0.0433968	0.0118519	0.00841783	0.0663019	0.409422	0	48.0646	25.4068	0	48.4651	84.0309	14.1368
767	0.121677	0.0411674	0.300073	0	0.0452007	0.0105327	0.00858499	0.0660706	0.406694	0	47.9428	25.6999	0	49.3531	83.527	14.5989
768	0.124177	0.0461646	0.294937	0	0.0469334	0.00925918	0.00875106	0.0658481	0.40393	0	47.8087	25.9879	0	50.2264	83.0175	15.0659
769	0.126582	0.0510478	0.289826	0	0.0486006	0.00802348	0.0089154	0.065629	0.401376	0	47.6928	26.2837	0	51.0747	82.5074	15.5324
770	0.128979	0.0558299	0.284937	0	0.0502095	0.00682586	0.00907589	0.0654101	0.398733	0	47.5628	26.5695	0	51.9003	81.9975	15.9987
771	0.131455	0.0605073	0.280039	0	0.0517566	0.00566393	0.00923193	0.0651867	0.396159	0	47.4203	26.8596	0	52.7381	81.4679	16.4838
772	0.133765	0.0650835	0.275319	0	0.0532486	0.00453725	0.0093896	0.0649782	0.393679	0	47.2971	27.1476	0	53.5255	80.9535	16.9533
773	0.13614	0.0695637	0.270665	0	0.0546737	0.00344265	0.00954184	0.0647471	0.391226	0	47.1585	27.4341	0	54.316	80.4252	17.4364
774	0.138535	0.0739588	0.266076	0	0.0560525	0.00238055	0.00969391	0.0645405	0.388763	0	47.0126	27.7206	0	55.1007	79.887	17.9285
775	0.140817	0.0782629	0.261574	0	0.0573776	0.00134887	0.00984295	0.0643277	0.38645	0	46.8831	28.0098	0	55.8538	79.3548	18.4139
776	0.143109	0.0824785	0.257216	0	0.0586529	0.000346302	0.00999112	0.0641115	0.384094	0	46.7422	28.2922	0	56.5925	78.8197	18.9023
777	0.144782	0.0850885	0.254405	0	0.0592038	0	0.0100802	0.0639373	0.382502	0	46.6172	28.4645	0	57.1011	78.433	19.2398
778	0.146119	0.0868866	0.2524	0	0.059388	0	0.0101386	0.0637701	0.381298	0	46.5031	28.5784	0	57.4871	78.1261	19.4951
779	0.147461	0.0887166	0.25041	0	0.0595749	0	0.0101991	0.0636176	0.380021	0	46.387	28.6915	0	57.8704	77.8166	19.752
780	0.148803	0.0905601	0.248318	0	0.0597621	0	0.0102613	0.0634544	0.37884	0	46.2787	28.8144	0	58.2608	77.4974	20.0172
781	0.150206	0.0923967	0.24628	0	0.0599362	0	0.0103246	0.0632777	0.377579	0	46.1561	28.9313	0	58.6541	77.173	20.2878
782	0.151552	0.0942845	0.244204	0	0.0601257	0	0.0103905	0.0631177	0.376326	0	46.0464	29.0544	0	59.0392	76.8482	20.5568
783	0.152976	0.096176	0.242105	0	0.0603092	0	0.010457	0.0629403	0.375036	0	45.925	29.1776	0	59.4367	76.5108	20.8379
784	0.154408	0.098101	0.23992	0	0.0605052	0	0.0105257	0.0627672	0.373772	0	45.8084	29.3093	0	59.841	76.1624	21.1279
785	0.155901	0.100018	0.237792	0	0.0606796	0	0.0105955	0.0625813	0.372432	0	45.6778	29.4344	0	60.2472	75.8092	21.4232
786	0.157327	0.101966	0.235606	0	0.060865	0	0.0106672	0.062407	0.371162	0	45.5634	29.5687	0	60.6459	75.4548	21.7178
787	0.158829	0.103917	0.233399	0	0.0610441	0	0.0107395	0.0622155	0.369856	0	45.4376	29.703	0	61.056	75.0874	22.0248
788	0.160328	0.105878	0.23119	0	0.0612222	0	0.0108114	0.0620234	0.368546	0	45.3132	29.8387	0	61.4633	74.7169	22.3342
789	0.163332	0.109832	0.226798	0	0.0615735	0	0.0109643	0.0616331	0.365867	0	45.0627	30.111	0	62.2689	73.9663	22.9603
790	0.164914	0.111827	0.22459	0	0.0617403	0	0.0110407	0.0614285	0.364459	0	44.9255	30.2467	0	62.6806	73.5763	23.2871
791	0.166497	0.113822	0.222286	0	0.0618992	0	0.0111189	0.0612254	0.363152	0	44.7955	30.3932	0	63.0991	73.1741	23.6246
792	0.16809	0.115836	0.219999	0	0.062071	0	0.0111993	0.0610266	0.361778	0	44.6631	30.5388	0	63.5144	72.7682	23.9648
793	0.169661	0.117865	0.217793	0	0.0622266	0	0.0112801	0.0608098	0.360365	0	44.5295	30.6785	0	63.9164	72.3678	24.2994
794	0.171248	0.119903	0.215508	0	0.0623883	0	0.0113636	0.0605995	0.35899	0	44.3992	30.8267	0	64.3255	71.9546	24.6452
795	0.172923	0.121965	0.213118	0	0.0625487	0	0.0114484	0.0603881	0.357609	0	44.2617	30.9832	0	64.7536	71.5178	25.0126
796	0.174516	0.124049	0.210849	0	0.0627046	0	0.0115356	0.0601815	0.356165	0	44.1304	31.1321	0	65.1561	71.0964	25.3643
797	0.176262	0.126122	0.208442	0	0.0628493	0	0.0116207	0.0599532	0.35475	0	43.984	31.2902	0	65.5897	70.6417	25.7482
798	0.177911	0.128192	0.206139	0	0.062993	0	0.0117088	0.0597245	0.353333	0	43.8475	31.4433	0	65.9978	70.203	26.1162
799	0.179588	0.13031	0.20377	0	0.0631385	0	0.0118005	0.0595063	0.351887	0	43.7109	31.6033	0	66.4125	69.7495	26.4966
800	0.181341	0.132415	0.201387	0	0.0632786	0	0.0118928	0.0592722	0.350413	0	43.5639	31.763	0	66.8354	69.2822	26.8905
801	0.183092	0.134531	0.199006	0	0.0634095	0	0.0119849	0.0590381	0.348939	0	43.4182	31.9242	0	67.2548	68.8105	27.2878
802	0.184837	0.136657	0.196624	0	0.063539	0	0.0120799	0.0588032	0.34746	0	43.2742	32.0873	0	67.6706	68.3342	27.6887
803	0.186673	0.138795	0.194143	0	0.0636598	0	0.0121766	0.0585687	0.345984	0	43.1228	32.2588	0	68.1038	67.8325	28.1132
804	0.188412	0.140943	0.191764	0	0.0637796	0	0.0122729	0.0583226	0.344505	0	42.9812	32.4251	0	68.5126	67.3469	28.5214
805	0.190245	0.143091	0.189289	0	0.0638916	0	0.012371	0.0580779	0.343034	0	42.8319	32.5996	0	68.9387	66.8354	28.9538
806	0.192079	0.145225	0.186821	0	0.063996	0	0.0124725	0.0578345	0.341572	0	42.6828	32.7753	0	69.3611	66.3194	29.3906
807	0.193967	0.147415	0.184423	0	0.0640881	0	0.0125715	0.0575805	0.339955	0	42.5222	32.9415	0	69.7792	65.8	29.8299
808	0.195812	0.149498	0.181974	0	0.0641883	0	0.0126754	0.057331	0.338522	0	42.3726	33.1185	0	70.195	65.2752	30.2754
809	0.19772	0.151701	0.179503	0	0.0642708	0	0.012779	0.0570739	0.336953	0	42.2153	33.2958	0	70.6158	64.7335	30.734
810	0.199625	0.153901	0.177035	0	0.0643532	0	0.0128826	0.0568171	0.335386	0	42.0593	33.4748	0	71.033	64.1866	31.197
811	0.20155	0.156116	0.174486	0	0.0644337	0	0.0129906	0.0565667	0.333857	0	41.9061	33.6644	0	71.4566	63.6211	31.6763
812	0.20155	0.156116	0.174486	0	0.0644337	0	0.0129906	0.0565667	0.333857	0	41.9061	33.6644	0	71.4566	63.6211	31.6763
813	0.20155	0.156116	0.174486	0	0.0644337	0	0.0129906	0.0565667	0.333857	0	41.9061	33.6644	0	71.4566	63.6211	31.6763
814	0.205434	0.160498	0.169559	0	0.0645521	0	0.0132064	0.0560305	0.33072	0	41.5882	34.0277	0	72.2812	62.4915	32.6351
815	0.20746	0.162575	0.167031	0	0.0646199	0	0.0133184	0.0557742	0.329221	0	41.4229	34.2167	0	72.704	61.9021	33.1402
816	0.209439	0.164756	0.164573	0	0.064656	0	0.013429	0.055495	0.327652	0	41.2613	34.4009	0	73.1112	61.3191	33.6363
817	0.211507	0.166935	0.162014	0	0.0646919	0	0.013541	0.055227	0.326084	0	41.094	34.595	0	73.5334	60.7065	34.16
818	0.213481	0.169112	0.159563	0	0.0647196	0	0.0136547	0.0549488	0.324521	0	40.935	34.7826	0	73.9328	60.112	34.6659
819	0.215569	0.171305	0.157029	0	0.0647456	0	0.0137697	0.0546769	0.322905	0	40.7658	34.9764	0	74.3472	59.4874	35.1999
820	0.217585	0.173583	0.154552	0	0.0647423	0	0.0138834	0.0543769	0.321278	0	40.6045	35.1684	0	74.7456	58.8701	35.7241
821	0.219674	0.175776	0.15203	0	0.0647444	0	0.0140018	0.0540966	0.319677	0	40.4369	35.365	0	75.152	58.2332	36.2688
822	0.221811	0.177933	0.149481	0	0.0647339	0	0.014119	0.053817	0.318105	0	40.2661	35.5651	0	75.5621	57.5811	36.8287
823	0.223899	0.180124	0.146968	0	0.0647284	0	0.0142407	0.0535271	0.316513	0	40.1008	35.7652	0	75.9605	56.9312	37.3847
824	0.226056	0.182296	0.144442	0	0.064708	0	0.0143625	0.0532434	0.314892	0	39.9284	35.9652	0	76.3625	56.266	37.9559
825	0.228214	0.184469	0.141923	0	0.0646803	0	0.0144845	0.0529501	0.313278	0	39.7569	36.1666	0	76.7605	55.5941	38.5329
826	0.230443	0.186624	0.139394	0	0.0646384	0	0.0146067	0.0526527	0.311641	0	39.5782	36.3675	0	77.1616	54.907	39.1252
827	0.232601	0.188796	0.136884	0	0.0645861	0	0.0147335	0.0523612	0.310038	0	39.409	36.5722	0	77.5514	54.2216	39.714
828	0.234827	0.190948	0.134364	0	0.064528	0	0.0148589	0.0520653	0.308409	0	39.2331	36.7767	0	77.9441	53.5208	40.3182
829	0.237023	0.193217	0.131831	0	0.0644452	0	0.014984	0.0517528	0.306747	0	39.0628	36.9859	0	78.3313	52.8109	40.9267
830	0.239249	0.195369	0.129321	0	0.0643717	0	0.015111	0.0514481	0.30513	0	38.8893	37.1936	0	78.716	52.0961	41.5431
831	0.241545	0.197503	0.126804	0	0.0642761	0	0.01524	0.0511398	0.303492	0	38.7088	37.4003	0	79.1027	51.3661	42.1749
832	0.243772	0.199654	0.124303	0	0.0641783	0	0.0153703	0.050837	0.301886	0	38.5379	37.6113	0	79.4792	50.6371	42.8037
833	0.246093	0.201807	0.121808	0	0.064065	0	0.0155025	0.0505249	0.3002	0	38.3563	37.8175	0	79.8578	49.8927	43.4482
834	0.248388	0.203939	0.119305	0	0.0639459	0	0.0156363	0.0502085	0.298578	0	38.1799	38.0292	0	80.2321	49.1409	44.099
835	0.250775	0.206072	0.116806	0	0.0638107	0	0.0157701	0.0498933	0.296873	0	37.9938	38.2364	0	80.6081	48.3739	44.7653
836	0.253035	0.208315	0.114296	0	0.0636588	0	0.0159018	0.049572	0.295221	0	37.8249	38.4551	0	80.9732	47.6052	45.4272
837	0.255448	0.210469	0.111718	0	0.0635147	0	0.0160405	0.0492529	0.293558	0	37.6426	38.6779	0	81.3513	46.8008	46.126
838	0.257836	0.212601	0.109233	0	0.0633568	0	0.0161713	0.04893	0.291871	0	37.4609	38.8899	0	81.7157	46.0108	46.8125
839	0.260288	0.214711	0.106741	0	0.0631759	0	0.0163214	0.0486028	0.290159	0	37.2731	39.1012	0	82.0791	45.2056	47.5144
840	0.262676	0.216844	0.104265	0	0.0629939	0	0.016457	0.0482817	0.288482	0	37.0944	39.3166	0	82.435	44.4002	48.2145
841	0.265155	0.218976	0.101693	0	0.0628044	0	0.0166088	0.0479507	0.286812	0	36.9106	39.5441	0	82.8008	43.5552	48.9511
842	0.267614	0.221092	0.0992168	0	0.0625938	0	0.0167432	0.0476168	0.285124	0	36.7275	39.7595	0	83.1538	42.7262	49.6741
843	0.270078	0.223212	0.096707	0	0.0623769	0	0.0168941	0.047285	0.283447	0	36.5462	39.9826	0	83.5055	41.8791	50.4129
844	0.27261	0.225312	0.0942031	0	0.0621469	0	0.0170274	0.0469499	0.281751	0	36.3599	40.2025	0	83.8583	41.0191	51.1652
845	0.275143	0.227415	0.0916944	0	0.0619015	0	0.017177	0.0466055	0.280063	0	36.1746	40.4255	0	84.2065	40.1482	51.9272
846	0.277676	0.229517	0.0891897	0	0.0616484	0	0.0173266	0.046262	0.27838	0	35.9912	40.6503	0	84.5507	39.2688	52.6967
847	0.280194	0.231747	0.0866845	0	0.0613844	0	0.0174752	0.0459168	0.276598	0	35.8108	40.8774	0	84.8898	38.3789	53.4715
848	0.282792	0.233828	0.0841809	0	0.0611023	0	0.0176232	0.0455712	0.274902	0	35.6241	41.1023	0	85.2303	37.4756	54.2644
849	0.285356	0.235955	0.0816877	0	0.0608248	0	0.0177747	0.0452247	0.273176	0	35.4422	41.33	0	85.5639	36.5671	55.0596
850	0.288044	0.238036	0.0791821	0	0.0605276	0	0.0179387	0.04487	0.271401	0	35.2493	41.5532	0	85.8998	35.6369	55.8784
851	0.290651	0.240125	0.0766833	0	0.0602165	0	0.0180874	0.0445071	0.269729	0	35.0673	41.7841	0	86.2296	34.7041	56.6974
852	0.293342	0.242209	0.074177	0	0.0598967	0	0.0182516	0.044155	0.267969	0	34.8781	42.0122	0	86.5585	33.7531	57.5347
853	0.296039	0.244299	0.0716863	0	0.0595623	0	0.0184003	0.0437941	0.266219	0	34.6903	42.2392	0	86.8841	32.796	58.3775
854	0.298734	0.246386	0.0691889	0	0.0592199	0	0.0185648	0.0434336	0.264472	0	34.5044	42.4703	0	87.2052	31.8266	59.2313
855	0.301434	0.248478	0.0666862	0	0.0588625	0	0.0187296	0.0430748	0.262735	0	34.3202	42.7046	0	87.5235	30.8446	60.0962
856	0.304199	0.25055	0.0641819	0	0.0584929	0	0.0188929	0.0427027	0.260981	0	34.1317	42.9365	0	87.8413	29.8475	60.9768
857	0.306993	0.252645	0.0616873	0	0.0581129	0	0.0190579	0.0423354	0.259169	0	33.942	43.1661	0	88.1552	28.8408	61.8659
858	0.30982	0.254695	0.0591855	0	0.0577151	0	0.0192196	0.0419615	0.257402	0	33.7516	43.3975	0	88.4682	27.8194	62.7705
859	0.31259	0.256771	0.0566835	0	0.0573072	0	0.0193991	0.0415819	0.255667	0	33.5682	43.6363	0	88.7738	26.79	63.68
860	0.315452	0.258851	0.0541857	0	0.0568926	0	0.0195629	0.0412038	0.253852	0	33.3784	43.8684	0	89.0802	25.7457	64.605
861	0.318376	0.260907	0.0516768	0	0.056457	0	0.0197409	0.0408229	0.25202	0	33.185	44.1003	0	89.3848	24.6834	65.5483
862	0.321218	0.262971	0.049173	0	0.0560157	0	0.0199035	0.0404332	0.250286	0	33.0016	44.3409	0	89.6845	23.6156	66.4944
863	0.324146	0.265031	0.0466722	0	0.0555579	0	0.0200817	0.040044	0.248467	0	32.8119	44.5757	0	89.9815	22.5333	67.4557
864	0.327079	0.267097	0.0441658	0	0.0550853	0	0.0202603	0.0396564	0.246657	0	32.624	44.8137	0	90.2758	21.4371	68.4296
865	0.330028	0.269242	0.0416437	0	0.0545933	0	0.0204344	0.039261	0.244797	0	32.4372	45.055	0	90.5684	20.3217	69.4184
866	0.333055	0.271312	0.0391352	0	0.0541069	0	0.0206133	0.038865	0.242913	0	32.2453	45.2897	0	90.8584	19.1971	70.4199
867	0.336055	0.273361	0.036617	0	0.053592	0	0.0208064	0.0384669	0.241102	0	32.058	45.532	0	91.1442	18.0579	71.4344
868	0.339123	0.275392	0.0341002	0	0.0530665	0	0.0209823	0.0380565	0.23928	0	31.8676	45.7704	0	91.4299	16.9048	72.4639
869	0.342213	0.277443	0.0315793	0	0.0525374	0	0.0211754	0.0376603	0.237392	0	31.677	46.0097	0	91.7113	15.7369	73.5065
870	0.345316	0.279504	0.0290628	0	0.0519861	0	0.0213693	0.037245	0.235517	0	31.4875	46.2492	0	91.9891	14.5583	74.5591
871	0.348445	0.281516	0.0265347	0	0.0514183	0	0.0215594	0.0368346	0.233692	0	31.2986	46.4921	0	92.266	13.3617	75.63
872	0.351562	0.283657	0.0239998	0	0.0508417	0	0.0217487	0.0364133	0.231777	0	31.1128	46.7382	0	92.539	12.1492	76.7106
873	0.354736	0.285706	0.0214624	0	0.0502495	0	0.0219416	0.0359989	0.229905	0	30.9249	46.9834	0	92.8105	10.9217	77.8092
874	0.357965	0.287728	0.0189263	0	0.0496453	0	0.0221481	0.0355713	0.228016	0	30.7345	47.2258	0	93.0786	9.68087	78.9224
875	0.361236	0.289785	0.0163858	0	0.0490314	0	0.0223414	0.0351488	0.226071	0	30.5435	47.4666	0	93.3454	8.42413	80.0498
876	0.36448	0.291887	0.0138338	0	0.0483947	0	0.0225433	0.0347159	0.224146	0	30.3571	47.7151	0	93.6085	7.14932	81.1913
877	0.367813	0.293924	0.0112889	0	0.0477463	0	0.0227508	0.034282	0.222195	0	30.1657	47.956	0	93.8691	5.86357	82.3475
878	0.371152	0.295966	0.00873136	0	0.0470914	0	0.0229586	0.0338495	0.220251	0	29.9767	48.2018	0	94.1277	4.55842	83.521
879	0.374471	0.29806	0.006169	0	0.0464075	0	0.0231598	0.0333974	0.218336	0	29.7917	48.4528	0	94.3834	3.23744	84.7066
880	0.377873	0.300084	0.00360187	0	0.0457187	0	0.0233817	0.0329539	0.216387	0	29.6026	48.6998	0	94.6362	1.89987	85.9118
881	0.381267	0.30224	0.00102989	0	0.0450135	0	0.0235875	0.0325105	0.214352	0	29.4166	48.949	0	94.8865	0.546015	87.1271
882	0.383931	0.302869	0	0	0.0440761	0	0.0236772	0.0322608	0.213186	0	29.2485	48.9115	0	95.0034	0	87.6687
883	0.385986	0.302682	0	0	0.0429645	0	0.0236733	0.0321496	0.212544	0	29.1011	48.6927	0	95.0306	0	87.7438
884	0.388135	0.302432	0	0	0.041855	0	0.0236752	0.0320357	0.211868	0	28.9486	48.4669	0	95.0587	0	87.8229
885	0.390287	0.302183	0	0	0.0407372	0	0.0236773	0.031922	0.211194	0	28.7974	48.2427	0	95.0865	0	87.9013
886	0.392496	0.301911	0	0	0.0396078	0	0.0236774	0.0318057	0.210502	0	28.6439	48.0149	0	95.1151	0	87.9816
887	0.394659	0.30167	0	0	0.0384657	0	0.0236801	0.0316927	0.209833	0	28.4951	47.7937	0	95.1423	0	88.0589
888	0.396879	0.301406	0	0	0.0373203	0	0.0236809	0.0315667	0.209147	0	28.344	47.5689	0	95.1703	0	88.1378
889	0.399047	0.30124	0	0	0.0361535	0	0.0236786	0.0314472	0.208434	0	28.1978	47.35	0	95.1968	0	88.2115
890	0.401313	0.301009	0	0	0.034987	0	0.0236821	0.0313246	0.207684	0	28.0467	47.1242	0	95.2242	0	88.2893
891	0.403596	0.300725	0	0	0.0338057	0	0.0236814	0.0312072	0.206985	0	27.8963	46.8998	0	95.2523	0	88.3686
892	0.405889	0.30045	0	0	0.0326087	0	0.0236813	0.0310799	0.206291	0	27.7467	46.6763	0	95.2801	0	88.4473
893	0.408222	0.300202	0	0	0.0314064	0	0.0236835	0.0309557	0.20553	0	27.5962	46.4506	0	95.3076	0	88.5254
894	0.410523	0.299932	0	0	0.030193	0	0.0236838	0.0308289	0.20484	0	27.4493	46.2306	0	95.3348	0	88.6028
895	0.412915	0.299663	0	0	0.0289715	0	0.0236843	0.0307024	0.204064	0	27.2983	46.0038	0	95.3627	0	88.6818
896	0.415262	0.299426	0	0	0.0277361	0	0.0236872	0.0305791	0.203309	0	27.1516	45.783	0	95.3893	0	88.7579
897	0.417691	0.299046	0	0	0.0264915	0	0.0236897	0.0304446	0.202638	0	27.0017	45.5589	0	95.4177	0	88.84
898	0.420152	0.298763	0	0	0.0252265	0	0.0236891	0.0303167	0.201852	0	26.8514	45.3323	0	95.4456	0	88.9191
899	0.422571	0.298513	0	0	0.0239558	0	0.023691	0.0301813	0.201089	0	26.7052	45.1116	0	95.4723	0	88.9955
900	0.42505	0.298243	0	0	0.0226751	0	0.0236757	0.0300441	0.200312	0	26.5573	44.8876	0	95.5009	0	89.0732
901	0.427527	0.297971	0	0	0.0213858	0	0.023676	0.0299066	0.199534	0	26.4109	44.6661	0	95.5279	0	89.1503
902	0.430011	0.297704	0	0	0.0200801	0	0.0236766	0.0297696	0.198759	0	26.2657	44.4462	0	95.5545	0	89.2267
903	0.43265	0.297345	0	0	0.0187604	0	0.0236808	0.0296371	0.197927	0	26.1133	44.2158	0	95.5829	0	89.3089
904	0.4352	0.297062	0	0	0.0174283	0	0.0236802	0.0294879	0.197142	0	25.9676	43.9947	0	95.6098	0	89.386
905	0.437749	0.296779	0	0	0.0160878	0	0.0236795	0.0293493	0.196356	0	25.8236	43.7759	0	95.6364	0	89.4623
906	0.440408	0.296433	0	0	0.0147344	0	0.0236848	0.0292074	0.195533	0	25.675	43.5505	0	95.6638	0	89.5424
907	0.443026	0.296136	0	0	0.0133597	0	0.023683	0.0290569	0.194738	0	25.5304	43.3303	0	95.6907	0	89.6194
908	0.445748	0.295771	0	0	0.0119795	0	0.0236868	0.0289131	0.193902	0	25.3819	43.1045	0	95.7183	0	89.7
909	0.448412	0.295505	0	0	0.0105892	0	0.0236875	0.0287655	0.193041	0	25.238	42.8845	0	95.7446	0	89.7756
910	0.451195	0.295121	0	0	0.00918269	0	0.0236898	0.0286198	0.192192	0	25.0896	42.6585	0	95.7723	0	89.8565
911	0.453928	0.294843	0	0	0.00775743	0	0.0236895	0.0284604	0.191322	0	24.9454	42.4375	0	95.7988	0	89.9326
912	0.456729	0.29447	0	0	0.00632225	0	0.0236927	0.0283052	0.190481	0	24.7994	42.2146	0	95.8259	0	90.0122
913	0.459517	0.29417	0	0	0.00487136	0	0.0236907	0.0281543	0.189597	0	24.6558	41.9941	0	95.8525	0	90.0887
914	0.46238	0.293779	0	0	0.00340786	0	0.0236924	0.0279973	0.188744	0	24.5102	41.7711	0	95.8798	0	90.1686
915	0.465294	0.293421	0	0	0.00193011	0	0.0236969	0.0278328	0.187824	0	24.3635	41.5459	0	95.9068	0	90.2478
916	0.468107	0.293137	0	0	0.00043713	0	0.0236961	0.0276728	0.18695	0	24.2236	41.3303	0	95.9325	0	90.3222
917	0.469611	0.29278	0	0	0	0	0.0237006	0.0275295	0.186379	0	24.1497	41.2173	0	95.9472	0	90.3646
918	0.47039	0.292495	0	0	0	0	0.0236997	0.0273906	0.186025	0	24.1118	41.1595	0	95.9557	0	90.3875
919	0.471279	0.29214	0	0	0	0	0.0237045	0.0272476	0.185628	0	24.0687	41.094	0	95.9652	0	90.4144
920	0.472164	0.291783	0	0	0	0	0.0237089	0.0271147	0.185229	0	24.026	41.0292	0	95.9746	0	90.4413
921	0.472989	0.291526	0	0	0	0	0.0237104	0.0269678	0.184807	0	23.9861	40.9679	0	95.983	0	90.464
922	0.47388	0.291171	0	0	0	0	0.0237151	0.0268246	0.18441	0	23.9434	40.903	0	95.9924	0	90.4907
923	0.474771	0.290816	0	0	0	0	0.0237199	0.0266813	0.184012	0	23.9008	40.8382	0	96.0018	0	90.5173
924	0.47575	0.290461	0	0	0	0	0.0237246	0.0265379	0.183527	0	23.8541	40.7669	0	96.0118	0	90.5454
925	0.476576	0.290203	0	0	0	0	0.023726	0.0263909	0.183104	0	23.8149	40.7063	0	96.0201	0	90.5678
926	0.477475	0.289853	0	0	0	0	0.0237154	0.0262478	0.182709	0	23.7726	40.6415	0	96.0306	0	90.5942
927	0.478418	0.289475	0	0	0	0	0.0237183	0.0260917	0.182297	0	23.7282	40.5738	0	96.0405	0	90.6221
928	0.479311	0.289119	0	0	0	0	0.023723	0.0259481	0.181899	0	23.6863	40.51	0	96.0497	0	90.6484
929	0.480255	0.288741	0	0	0	0	0.0237259	0.0257919	0.181487	0	23.6421	40.4428	0	96.0596	0	90.6761
930	0.481153	0.288388	0	0	0	0	0.0237309	0.0256379	0.18109	0	23.6003	40.3789	0	96.0687	0	90.7022
931	0.482097	0.28801	0	0	0	0	0.0237338	0.0254815	0.180677	0	23.5564	40.312	0	96.0785	0	90.7298
932	0.483084	0.287657	0	0	0	0	0.0237387	0.0253273	0.180193	0	23.5107	40.2419	0	96.0883	0	90.7573
933	0.484029	0.287278	0	0	0	0	0.0237416	0.0251709	0.17978	0	23.4672	40.1754	0	96.098	0	90.7847
934	0.484979	0.286903	0	0	0	0	0.0237448	0.0250041	0.179369	0	23.4236	40.1088	0	96.1078	0	90.812
935	0.485925	0.286524	0	0	0	0	0.0237477	0.0248476	0.178956	0	23.3803	40.0427	0	96.1174	0	90.8392
936	0.486985	0.286075	0	0	0	0	0.0237561	0.0246862	0.178498	0	23.332	39.9693	0	96.128	0	90.8704
937	0.487936	0.285699	0	0	0	0	0.0237593	0.0245192	0.178086	0	23.2888	39.9032	0	96.1376	0	90.8974
938	0.488883	0.28532	0	0	0	0	0.0237622	0.0243625	0.177673	0	23.246	39.8378	0	96.1472	0	90.9244
939	0.489883	0.284971	0	0	0	0	0.0237677	0.0241872	0.177191	0	23.2009	39.7682	0	96.1567	0	90.9513
940	0.490948	0.284471	0	0	0	0	0.023772	0.0240212	0.176788	0	23.1533	39.6961	0	96.1678	0	90.9836
941	0.491943	0.284119	0	0	0	0	0.0237772	0.0238561	0.176304	0	23.1087	39.6274	0	96.1773	0	91.0103
942	0.493014	0.283622	0	0	0	0	0.0237818	0.0236796	0.175903	0	23.0611	39.5552	0	96.1883	0	91.0424
943	0.493967	0.283245	0	0	0	0	0.0237849	0.0235123	0.17549	0	23.0189	39.4904	0	96.1977	0	91.069
944	0.495014	0.282871	0	0	0	0	0.0237883	0.0233345	0.174992	0	22.9726	39.419	0	96.2077	0	91.0969
945	0.496042	0.282398	0	0	0	0	0.023795	0.0231599	0.174606	0	22.9274	39.3504	0	96.218	0	91.1272
946	0.497158	0.281924	0	0	0	0	0.0238017	0.0229851	0.174131	0	22.8786	39.2757	0	96.2289	0	91.1589
947	0.498168	0.281528	0	0	0	0	0.0238032	0.0227947	0.173707	0	22.8345	39.208	0	96.2388	0	91.1866
948	0.499285	0.281054	0	0	0	0	0.0238099	0.0226198	0.173232	0	22.786	39.1338	0	96.2496	0	91.2181
949	0.500408	0.280582	0	0	0	0	0.0238168	0.0224343	0.172759	0	22.7374	39.0594	0	96.2604	0	91.2495
950	0.501413	0.280183	0	0	0	0	0.0238181	0.0222542	0.172332	0	22.6941	38.9928	0	96.2701	0	91.2768
951	0.502581	0.279686	0	0	0	0	0.0238229	0.0220666	0.171843	0	22.644	38.9161	0	96.2815	0	91.3094
952	0.503706	0.279214	0	0	0	0	0.0238298	0.0218809	0.171369	0	22.596	38.8424	0	96.2921	0	91.3405
953	0.504793	0.27872	0	0	0	0	0.023835	0.0216828	0.170969	0	22.5498	38.7719	0	96.3027	0	91.3715
954	0.505962	0.278223	0	0	0	0	0.0238398	0.0214949	0.17048	0	22.5003	38.6959	0	96.3139	0	91.4038
955	0.507094	0.277753	0	0	0	0	0.023847	0.0212985	0.170007	0	22.4525	38.6226	0	96.3244	0	91.4346
956	0.508226	0.277234	0	0	0	0	0.02385	0.0210982	0.169592	0	22.4051	38.5501	0	96.3355	0	91.4666
957	0.509403	0.276739	0	0	0	0	0.023855	0.0208997	0.169103	0	22.3559	38.4745	0	96.3466	0	91.4986
958	0.510536	0.276268	0	0	0	0	0.0238622	0.0207029	0.16863	0	22.3087	38.4018	0	96.357	0	91.5291
959	0.511714	0.275773	0	0	0	0	0.0238673	0.0205042	0.168141	0	22.2599	38.3267	0	96.368	0	91.5608
960	0.512898	0.27528	0	0	0	0	0.0238727	0.0202949	0.167654	0	22.211	38.2515	0	96.3789	0	91.5924
961	0.514082	0.274787	0	0	0	0	0.023878	0.0200856	0.167167	0	22.1623	38.1765	0	96.3898	0	91.6239
962	0.515331	0.274142	0	0	0	0	0.0238822	0.0198858	0.166759	0	22.1115	38.0992	0	96.4021	0	91.6605
963	0.516522	0.273652	0	0	0	0	0.0238878	0.0196658	0.166273	0	22.063	38.0243	0	96.4129	0	91.6918
964	0.517708	0.273158	0	0	0	0	0.0238931	0.0194562	0.165785	0	22.0149	37.9501	0	96.4237	0	91.723
965	0.519009	0.272539	0	0	0	0	0.0238997	0.0192474	0.165305	0	21.9625	37.8699	0	96.4359	0	91.7592
966	0.520202	0.272048	0	0	0	0	0.0239053	0.0190271	0.164818	0	21.9145	37.7958	0	96.4465	0	91.7901
967	0.52151	0.271431	0	0	0	0	0.0239121	0.0188076	0.164339	0	21.8623	37.7158	0	96.4587	0	91.8261
968	0.522819	0.270814	0	0	0	0	0.0239189	0.0185879	0.16386	0	21.8103	37.636	0	96.4707	0	91.8619
969	0.524062	0.2703	0	0	0	0	0.0239226	0.0183551	0.16336	0	21.7611	37.5598	0	96.4818	0	91.8938
970	0.525426	0.269711	0	0	0	0	0.023916	0.0181371	0.16281	0	21.7075	37.4767	0	96.4949	0	91.9294
971	0.526743	0.269095	0	0	0	0	0.0239231	0.0179066	0.162332	0	21.6559	37.3975	0	96.5068	0	91.9648
972	0.527987	0.268581	0	0	0	0	0.0239269	0.0176735	0.161831	0	21.6073	37.3221	0	96.5177	0	91.9963
973	0.529306	0.267965	0	0	0	0	0.0239339	0.0174427	0.161352	0	21.5562	37.2434	0	96.5296	0	92.0315
974	0.53063	0.267352	0	0	0	0	0.0239413	0.0172012	0.160875	0	21.505	37.1646	0	96.5413	0	92.0666
975	0.532044	0.266738	0	0	0	0	0.0239486	0.0169596	0.16031	0	21.4505	37.0804	0	96.5536	0	92.1027
976	0.533412	0.2661	0	0	0	0	0.0239538	0.0167163	0.159818	0	21.3982	36.9997	0	96.5658	0	92.1388
977	0.534739	0.265485	0	0	0	0	0.0239611	0.0164745	0.15934	0	21.3477	36.9218	0	96.5774	0	92.1734
978	0.536109	0.264847	0	0	0	0	0.0239663	0.016231	0.158847	0	21.2958	36.8418	0	96.5895	0	92.2092
979	0.537607	0.264132	0	0	0	0	0.0239772	0.0159804	0.158304	0	21.2393	36.7548	0	96.6025	0	92.2486
980	0.538983	0.263495	0	0	0	0	0.0239827	0.0157261	0.157813	0	21.1877	36.675	0	96.6145	0	92.284
981	0.540408	0.262881	0	0	0	0	0.0239903	0.015473	0.157247	0	21.1345	36.5923	0	96.6264	0	92.3194
982	0.541786	0.262244	0	0	0	0	0.0239957	0.0152184	0.156755	0	21.0833	36.5132	0	96.6383	0	92.3545
983	0.543336	0.261506	0	0	0	0	0.0240048	0.0149552	0.156198	0	21.0261	36.4248	0	96.6516	0	92.3945
984	0.544712	0.260867	0	0	0	0	0.0240261	0.0146895	0.155705	0	20.9753	36.3465	0	96.6623	0	92.4294
985	0.546263	0.260128	0	0	0	0	0.0240352	0.0144259	0.155147	0	20.9185	36.2588	0	96.6754	0	92.4691
986	0.547773	0.259369	0	0	0	0	0.0240424	0.0141502	0.154665	0	20.8637	36.1743	0	96.6885	0	92.5085
987	0.549215	0.258758	0	0	0	0	0.0240505	0.0138749	0.154101	0	20.8114	36.0928	0	96.7001	0	92.543
988	0.550727	0.257998	0	0	0	0	0.0240577	0.0135989	0.153618	0	20.7571	36.009	0	96.7131	0	92.5822
989	0.552329	0.257236	0	0	0	0	0.0240649	0.0133227	0.153047	0	20.6998	35.9201	0	96.7265	0	92.6224
990	0.553897	0.2565	0	0	0	0	0.0240745	0.0130369	0.152491	0	20.6439	35.8334	0	96.7393	0	92.6612
991	0.55534	0.255845	0	0	0	0	0.0240786	0.0127479	0.151988	0	20.5928	35.7538	0	96.7512	0	92.6962
992	0.556951	0.255086	0	0	0	0	0.0240861	0.0124606	0.151417	0	20.536	35.6657	0	96.7644	0	92.7359
993	0.558528	0.254351	0	0	0	0	0.024096	0.0121635	0.150861	0	20.4807	35.5796	0	96.7771	0	92.7743
994	0.560225	0.253488	0	0	0	0	0.0241071	0.0118668	0.150313	0	20.4216	35.4883	0	96.791	0	92.8172
995	0.561845	0.252729	0	0	0	0	0.0241148	0.0115681	0.149742	0	20.3655	35.4009	0	96.8041	0	92.8564
996	0.563466	0.25197	0	0	0	0	0.0241225	0.0112693	0.149172	0	20.3096	35.3139	0	96.817	0	92.8954
997	0.565094	0.251213	0	0	0	0	0.0241305	0.0109596	0.148603	0	20.2538	35.2269	0	96.83	0	92.9342
998	0.566805	0.250351	0	0	0	0	0.024142	0.010648	0.148054	0	20.1955	35.1365	0	96.8436	0	92.9765
999	0.568438	0.249594	0	0	0	0	0.0241502	0.0103325	0.147485	0	20.1401	35.0501	0	96.8564	0	93.0149
1000	0.570194	0.24871	0	0	0	0	0.0241596	0.010013	0.146923	0	20.081	34.9583	0	96.8704	0	93.0579

## Sheet: Melt-extracted at 0.5 GPa
Temperature (°C)	Modeled proportion of minerals (wt%)										CW in melt (ppm)	CSn in melt (ppm)	Proportion of Sn in Bi (wt%)	Proportion of Sn in melt (wt%)
	Melt	Cd	G	Bi	Opx	Ksp	Pl	Ilm	Sill	Q
681	2.97296e-05	0	0	0.383576	0	0.0324053	0.0292417	0.0107814	0.0669432	0.477022	49.2832	23.3342	98.4124	0.00327224
682	9.24862e-05	0	0	0.383566	0	0.0324407	0.0292026	0.0107505	0.0670331	0.476915	49.2687	23.3338	98.4079	0.0101795
683	0.00015562	0	0	0.383551	0	0.0324757	0.0291633	0.0107177	0.0671338	0.476803	49.2548	23.3336	98.4034	0.0171282
684	0.000219052	0	0	0.383474	0	0.0325145	0.0291273	0.010688	0.0672309	0.476746	49.2482	23.337	98.3982	0.0241133
685	0.00028294	0	0	0.38346	0	0.0325587	0.0290879	0.0106553	0.0673202	0.476635	49.234	23.3368	98.3935	0.0311458
686	0.000347113	0	0	0.383449	0	0.032594	0.0290488	0.0106243	0.0674101	0.476527	49.2192	23.3364	98.3889	0.0382092
687	0.000411607	0	0	0.383368	0	0.0326324	0.0290124	0.0105944	0.0675178	0.476464	49.2128	23.3401	98.3836	0.0453157
688	0.000476544	0	0	0.383357	0	0.0326678	0.0289733	0.0105618	0.0676077	0.476356	49.1979	23.3396	98.3789	0.0524639
689	0.000541667	0	0	0.383345	0	0.032703	0.0289342	0.0105309	0.0676974	0.476248	49.1829	23.3392	98.3741	0.0596324
690	0.000607235	0	0	0.383268	0	0.0327418	0.0288982	0.0104994	0.0677945	0.476191	49.1758	23.3426	98.3687	0.0668605
691	0.000673026	0	0	0.383256	0	0.0327771	0.028859	0.0104684	0.0678842	0.476082	49.1606	23.3422	98.3639	0.0741032
692	0.000738997	0	0	0.38324	0	0.032812	0.0288196	0.0104357	0.0679847	0.475969	49.146	23.342	98.359	0.0813663
693	0.000805258	0	0	0.383228	0	0.0328473	0.0287804	0.0104048	0.0680744	0.47586	49.1307	23.3415	98.3541	0.0886602
694	0.000871608	0	0	0.383151	0	0.032886	0.0287443	0.0103733	0.0681714	0.475802	49.1235	23.3449	98.3487	0.0959794
695	0.000937697	0	0	0.383148	0	0.0329129	0.0287058	0.0103408	0.0682511	0.475704	49.1073	23.344	98.3439	0.103253
696	0.00100434	0	0	0.383136	0	0.0329482	0.0286666	0.0103099	0.0683408	0.475595	49.0919	23.3436	98.3389	0.110589
697	0.00107137	0	0	0.383058	0	0.0329869	0.0286305	0.0102784	0.0684378	0.475537	49.0845	23.347	98.3334	0.117987
698	0.00113925	0	0	0.383046	0	0.0330221	0.0285913	0.0102474	0.0685273	0.475427	49.0688	23.3465	98.3283	0.12546
699	0.0012081	0	0	0.383037	0	0.0330486	0.0285524	0.0102149	0.0686175	0.475322	49.0525	23.3459	98.3232	0.133038
700	0.00127692	0	0	0.383023	0	0.0330837	0.0285131	0.0101839	0.068707	0.475212	49.0366	23.3455	98.318	0.140615
701	0.0013459	0	0	0.382949	0	0.0331137	0.0284772	0.0101524	0.0688045	0.475157	49.0283	23.3486	98.3123	0.148231
702	0.00141568	0	0	0.382935	0	0.0331488	0.028438	0.0101215	0.0688939	0.475047	49.0121	23.3482	98.307	0.155913
703	0.00148641	0	0	0.382922	0	0.0331839	0.0283987	0.0100888	0.0689834	0.474937	48.9958	23.3477	98.3017	0.1637
704	0.00155829	0	0	0.38285	0	0.0332141	0.028363	0.0100591	0.0690699	0.474885	48.986	23.3507	98.2956	0.171638
705	0.00162998	0	0	0.382837	0	0.0332492	0.0283238	0.0100265	0.0691593	0.474775	48.9695	23.3502	98.2902	0.17953
706	0.00170169	0	0	0.38283	0	0.0332758	0.0282754	0.00999566	0.0692499	0.474672	48.952	23.3495	98.2854	0.187423
707	0.00177528	0	0	0.382815	0	0.0333108	0.0282361	0.00996298	0.0693391	0.47456	48.935	23.349	98.2797	0.195524
708	0.00184907	0	0	0.382738	0	0.0333406	0.0282	0.00993313	0.0694362	0.474503	48.9253	23.3522	98.2734	0.203679
709	0.00192267	0	0	0.382728	0	0.0333668	0.0281609	0.00990054	0.0695261	0.474395	48.9079	23.3516	98.2678	0.21178
710	0.00199816	0	0	0.382712	0	0.0334018	0.0281215	0.00986952	0.0696151	0.474282	48.8903	23.3511	98.2619	0.220091
711	0.00207293	0	0	0.382635	0	0.0334315	0.0280854	0.00983797	0.0697123	0.474225	48.8806	23.3543	98.2556	0.228357
712	0.00214938	0	0	0.382623	0	0.0334667	0.0280367	0.00980705	0.0698019	0.474116	48.8623	23.3538	98.2502	0.236775
713	0.00222586	0	0	0.382615	0	0.0334933	0.0279979	0.00977454	0.0698808	0.474012	48.8436	23.3528	98.2443	0.24519
714	0.00230327	0	0	0.382602	0	0.0335194	0.0279587	0.0097436	0.0699703	0.473903	48.8252	23.3522	98.2382	0.253709
715	0.00238187	0	0	0.382523	0	0.033549	0.0279224	0.00971369	0.0700671	0.473843	48.8143	23.3554	98.2314	0.262403
716	0.00246141	0	0	0.382546	0	0.0335873	0.0278763	0.00968197	0.0701632	0.473683	48.7909	23.3526	98.2258	0.271134
717	0.00254072	0	0	0.382533	0	0.0336133	0.027837	0.00965101	0.0702525	0.473573	48.772	23.352	98.2195	0.279863
718	0.00262127	0	0	0.382454	0	0.0336429	0.0278007	0.00961938	0.0703494	0.473513	48.7608	23.3551	98.2125	0.288774
719	0.00270153	0	0	0.38244	0	0.0336689	0.0277614	0.00958842	0.0704387	0.473401	48.7416	23.3545	98.2062	0.297607
720	0.00278372	0	0	0.382429	0	0.0336952	0.0277128	0.00955585	0.0705286	0.473294	48.7216	23.3537	98.2002	0.306652
721	0.00286616	0	0	0.382346	0	0.0337334	0.0276762	0.00952579	0.0706245	0.473228	48.7103	23.3571	98.193	0.315779
722	0.00294927	0	0	0.38233	0	0.0337593	0.0276368	0.0094948	0.0707136	0.473116	48.6905	23.3564	98.1863	0.324927
723	0.00303336	0	0	0.382319	0	0.0337855	0.0275882	0.00946222	0.0708034	0.473008	48.6701	23.3557	98.1802	0.33418
724	0.00311742	0	0	0.382304	0	0.0338114	0.0275488	0.00943122	0.0708923	0.472895	48.65	23.355	98.1734	0.343431
725	0.00320376	0	0	0.382227	0	0.0338412	0.0275127	0.00939964	0.0709781	0.472838	48.6368	23.3579	98.1658	0.352985
726	0.00328974	0	0	0.382214	0	0.0338673	0.027464	0.00936872	0.0710677	0.472728	48.6159	23.3571	98.1595	0.362448
727	0.00337665	0	0	0.382198	0	0.033893	0.0274245	0.0093377	0.0711564	0.472614	48.5951	23.3565	98.1524	0.372012
728	0.00346487	0	0	0.382116	0	0.0339224	0.027388	0.00930598	0.0712528	0.47255	48.582	23.3596	98.1446	0.381783
729	0.00355374	0	0	0.382106	0	0.0339396	0.0273394	0.00927513	0.0713427	0.472444	48.5599	23.3587	98.1379	0.39156
730	0.00364349	0	0	0.382088	0	0.0339653	0.0272999	0.00924409	0.0714312	0.472328	48.5385	23.358	98.1306	0.401437
731	0.00373364	0	0	0.382005	0	0.0339946	0.0272633	0.00921235	0.0715275	0.472263	48.525	23.3611	98.1225	0.411425
732	0.00382569	0	0	0.382027	0	0.0340237	0.027217	0.00918224	0.0716233	0.472102	48.4981	23.3582	98.1156	0.421514
733	0.00391734	0	0	0.382008	0	0.0340493	0.0271774	0.00915119	0.0717117	0.471985	48.4763	23.3575	98.108	0.4316
734	0.00401044	0	0	0.381932	0	0.03407	0.0271317	0.00911959	0.0718091	0.471928	48.4611	23.3603	98.1003	0.441912
735	0.00410494	0	0	0.381912	0	0.0340955	0.0270921	0.00908851	0.0718973	0.47181	48.4386	23.3597	98.0924	0.452312
736	0.00419948	0	0	0.381896	0	0.0341213	0.0270431	0.00905752	0.0719861	0.471696	48.4156	23.3589	98.0851	0.462713
737	0.00429542	0	0	0.381815	0	0.0341417	0.0270066	0.0090258	0.0720826	0.471633	48.4002	23.3618	98.0765	0.473343
738	0.00439185	0	0	0.381798	0	0.0341674	0.0269576	0.00899479	0.0721714	0.471519	48.3768	23.361	98.069	0.483954
739	0.00448922	0	0	0.381781	0	0.034184	0.0269181	0.00896378	0.07226	0.471404	48.3532	23.3602	98.0609	0.494665
740	0.00458899	0	0	0.381698	0	0.0342133	0.026872	0.00893202	0.0723563	0.471339	48.3368	23.3632	98.0524	0.505724
741	0.0046887	0	0	0.381716	0	0.0342331	0.026835	0.00890183	0.0724515	0.471173	48.3083	23.3601	98.044	0.516644
742	0.00478893	0	0	0.381698	0	0.0342587	0.0267859	0.0088708	0.0725399	0.471057	48.284	23.3593	98.0361	0.52767
743	0.00489157	0	0	0.381614	0	0.0342788	0.0267491	0.00884069	0.0726359	0.47099	48.2669	23.3623	98.0268	0.539048
744	0.0049937	0	0	0.381596	0	0.0343044	0.0267	0.00880795	0.0727243	0.470874	48.2422	23.3615	98.0187	0.550283
745	0.00509771	0	0	0.381576	0	0.0343207	0.0266604	0.00877689	0.0728124	0.470756	48.2171	23.3605	98.0098	0.561723
746	0.00520326	0	0	0.381494	0	0.0343411	0.0266142	0.00874683	0.0729088	0.470692	48.1988	23.3634	98.0008	0.573424
747	0.00530923	0	0	0.381478	0	0.0343577	0.0265653	0.00871415	0.0729976	0.470578	48.1729	23.3624	97.9923	0.585076
748	0.00541654	0	0	0.38149	0	0.034386	0.0265278	0.0086838	0.0730917	0.470405	48.143	23.3595	97.9831	0.596827
749	0.00552497	0	0	0.381406	0	0.0344062	0.0264816	0.00865372	0.0731879	0.470339	48.1241	23.3623	97.9737	0.60885
750	0.00563467	0	0	0.381385	0	0.0344224	0.0264418	0.00862261	0.0732756	0.470218	48.0977	23.3614	97.9642	0.620914
751	0.00574536	0	0	0.381366	0	0.0344389	0.0263927	0.00859158	0.0733639	0.470102	48.0705	23.3604	97.9552	0.633085
752	0.00585763	0	0	0.381282	0	0.034459	0.0263464	0.00855976	0.07346	0.470035	48.0508	23.3632	97.9455	0.645533
753	0.00597015	0	0	0.381259	0	0.0344751	0.0263066	0.00852864	0.0735474	0.469913	48.0237	23.3623	97.9357	0.657908
754	0.0060852	0	0	0.381275	0	0.0344947	0.0262598	0.00849838	0.0736423	0.469745	47.9912	23.3591	97.9263	0.670493
755	0.00620121	0	0	0.381184	0	0.0345142	0.0262131	0.00846812	0.0737487	0.46967	47.9711	23.3622	97.9161	0.683367
756	0.00631752	0	0	0.38116	0	0.0345302	0.0261731	0.00843697	0.0738358	0.469546	47.9431	23.3612	97.9059	0.696156
757	0.00643579	0	0	0.381139	0	0.0345464	0.0261239	0.00840419	0.0739236	0.469427	47.9144	23.3602	97.8961	0.709157
758	0.00655669	0	0	0.381055	0	0.0345575	0.0260775	0.00837406	0.0740196	0.46936	47.8922	23.3628	97.8854	0.72256
759	0.00667747	0	0	0.381068	0	0.0345768	0.0260306	0.00834375	0.0741141	0.469189	47.8584	23.3596	97.8754	0.735768
760	0.00679951	0	0	0.381045	0	0.0345929	0.0259812	0.00831264	0.0742015	0.469067	47.8287	23.3586	97.8652	0.749183
761	0.00692417	0	0	0.380956	0	0.0346035	0.0259441	0.00828239	0.0742966	0.468993	47.8061	23.3613	97.8535	0.763006
762	0.00704905	0	0	0.380932	0	0.0346194	0.0258947	0.00825126	0.0743837	0.46887	47.7758	23.3602	97.843	0.776733
763	0.00717725	0	0	0.380878	0	0.0346423	0.0258504	0.00822007	0.0744858	0.468746	47.748	23.3608	97.8316	0.79088
764	0.00730496	0	0	0.380852	0	0.034649	0.0258008	0.0081889	0.074584	0.468621	47.7172	23.3598	97.8208	0.804918
765	0.00743551	0	0	0.380826	0	0.0346648	0.0257512	0.00815772	0.0746707	0.468494	47.6856	23.3588	97.8097	0.819266
766	0.00756684	0	0	0.380733	0	0.0346752	0.0257139	0.00812742	0.0747653	0.468418	47.6614	23.3615	97.7972	0.833832
767	0.00770101	0	0	0.380745	0	0.0346853	0.0256668	0.00809706	0.0748595	0.468245	47.6243	23.358	97.7859	0.848492
768	0.00783616	0	0	0.380652	0	0.0347046	0.0256199	0.00806672	0.0749539	0.468167	47.5992	23.3608	97.7736	0.863486
769	0.00797235	0	0	0.380623	0	0.034711	0.0255701	0.00803549	0.0750514	0.468037	47.5665	23.3598	97.7619	0.878456
770	0.00811127	0	0	0.380633	0	0.034721	0.0255229	0.00800509	0.0751453	0.467862	47.5284	23.3564	97.75	0.893631
771	0.00825126	0	0	0.380541	0	0.0347314	0.0254761	0.00797478	0.07524	0.467786	47.5018	23.3589	97.7373	0.909154
772	0.0083932	0	0	0.380514	0	0.034738	0.0254264	0.0079436	0.0753265	0.467658	47.4673	23.3577	97.725	0.924743
773	0.00853864	0	0	0.380452	0	0.0347511	0.0253815	0.0079139	0.0754385	0.467525	47.4357	23.3583	97.7117	0.940793
774	0.00868341	0	0	0.380424	0	0.0347576	0.0253318	0.00788271	0.0755248	0.467396	47.4006	23.357	97.6991	0.956692
775	0.00883101	0	0	0.380394	0	0.034764	0.025282	0.00785149	0.0756108	0.467266	47.3648	23.3557	97.6862	0.9729
776	0.00898229	0	0	0.380334	0	0.0347773	0.0252373	0.00782183	0.0757118	0.467135	47.3315	23.3561	97.6723	0.989581
777	0.0118416	0	0.0041412	0.377753	0	0.0362871	0.0243459	0.0079802	0.0757747	0.461876	46.7509	23.4304	97.318	1.30874
778	0.015259	0	0.00921173	0.371297	0	0.0377704	0.0230942	0.00811771	0.0751603	0.46009	46.4514	23.7284	96.8714	1.70789
779	0.0188252	0	0.0143261	0.368423	0	0.0395379	0.022115	0.00832997	0.0752622	0.453181	45.7177	23.801	96.4156	2.11348
780	0.0222212	0	0.019273	0.362101	0	0.040875	0.0209755	0.00846471	0.0746608	0.451429	45.424	24.0995	95.9498	2.52604
781	0.0617591	0.14756	0.0389706	0.226521	0	0.107804	0.0109136	0.0182299	0	0.388241	48.2962	35.0111	87.2007	10.1993
782	0.0658576	0.146459	0.0445175	0.219952	0	0.108251	0.0101855	0.0183768	0	0.386402	47.7828	35.635	86.1806	11.07
783	0.0699216	0.145356	0.0499609	0.213538	0	0.108684	0.00947357	0.0185207	0	0.384546	47.2736	36.2619	85.1394	11.9599
784	0.0746823	0.145698	0.0558558	0.209246	0	0.110198	0.00886575	0.018849	0	0.376605	46.3196	36.5415	84.0716	12.8727
785	0.0787189	0.144605	0.0611554	0.203003	0	0.110531	0.00818041	0.0189916	0	0.374815	45.8315	37.1779	82.9835	13.8047
786	0.0827111	0.143529	0.0663458	0.196939	0	0.110772	0.00751092	0.0191338	0	0.373058	45.3473	37.8126	81.8792	14.7524
787	0.0875255	0.14386	0.0721415	0.192803	0	0.112194	0.00692282	0.0194635	0	0.36509	44.44	38.089	80.7457	15.7253
788	0.0915024	0.142745	0.0771939	0.186835	0	0.112362	0.00627765	0.0196088	0	0.363475	43.98	38.7418	79.5872	16.7215
789	0.0954254	0.141692	0.0821082	0.180994	0	0.112601	0.00564502	0.0197311	0	0.361804	43.5335	39.4006	78.4101	17.735
790	0.0992771	0.140654	0.0869349	0.175324	0	0.112748	0.00502733	0.0198708	0	0.360163	43.0957	40.0583	77.2218	18.7588
791	0.104188	0.140921	0.0925587	0.171487	0	0.113911	0.00446564	0.0201885	0	0.35228	42.2283	40.3101	76.0065	19.8106
792	0.107997	0.139904	0.0972148	0.165988	0	0.113973	0.00386923	0.0203288	0	0.350725	41.812	40.9725	74.7781	20.8722
793	0.111866	0.138812	0.101749	0.16064	0	0.11403	0.00328384	0.0204495	0	0.34917	41.3797	41.6246	73.5207	21.9641
794	0.116748	0.139171	0.107233	0.156878	0	0.115122	0.00273934	0.0207904	0	0.341319	40.5785	41.8861	72.2498	23.0665
795	0.120506	0.138108	0.111626	0.151704	0	0.115102	0.00217366	0.0209132	0	0.339868	40.1807	42.5441	70.9647	24.1831
796	0.124227	0.137047	0.115899	0.146678	0	0.115077	0.00162057	0.021034	0	0.338417	39.7872	43.1975	69.6673	25.3128
797	0.127938	0.136018	0.12008	0.141717	0	0.114978	0.00107825	0.0211573	0	0.337033	39.3986	43.8596	68.3429	26.4684
798	0.132875	0.136364	0.125352	0.138213	0	0.115978	0.000552808	0.0214827	0	0.329183	38.6437	44.0927	67.0071	27.636
799	0.136473	0.135352	0.129377	0.133514	0	0.115795	2.77858e-05	0.0215893	0	0.327872	38.2809	44.738	65.6764	28.7996
800	0.138693	0.134257	0.131469	0.130211	0	0.115099	0	0.0216157	0	0.328656	38.0961	45.2279	64.7531	29.5886
801	0.141496	0.133745	0.134022	0.127488	0	0.114901	0	0.0217175	0	0.32663	37.7544	45.5276	63.8191	30.3866
802	0.144293	0.133312	0.136586	0.12477	0	0.114611	0	0.0218191	0	0.324608	37.4194	45.831	62.8747	31.1939
803	0.147098	0.132813	0.139141	0.122175	0	0.114331	0	0.0219222	0	0.32252	37.0803	46.1093	61.9408	31.9932
804	0.149883	0.132302	0.141694	0.119465	0	0.114132	0	0.0220231	0	0.320501	36.7588	46.4196	60.9744	32.8185
805	0.152784	0.131735	0.144263	0.116777	0	0.113859	0	0.0221444	0	0.318438	36.4201	46.717	59.9845	33.6679
806	0.155639	0.131211	0.14679	0.114172	0	0.113557	0	0.0222424	0	0.31639	36.0915	47.0041	59.0064	34.5078
807	0.158613	0.130712	0.149339	0.111484	0	0.113183	0	0.0223615	0	0.314308	35.753	47.3021	57.9826	35.3903
808	0.161487	0.130137	0.151869	0.108909	0	0.112903	0	0.0224633	0	0.312231	35.431	47.5866	56.9841	36.2483
809	0.164426	0.129619	0.154429	0.106235	0	0.112513	0	0.0225783	0	0.310201	35.1098	47.8926	55.9422	37.1451
810	0.167488	0.129051	0.156865	0.103629	0	0.112145	0	0.0226805	0	0.308142	34.7723	48.1736	54.8905	38.059
811	0.170424	0.128541	0.159423	0.101013	0	0.111762	0	0.0227963	0	0.30604	34.4597	48.4724	53.8368	38.9663
812	0.173472	0.127972	0.161847	0.0984364	0	0.111394	0	0.0228976	0	0.303981	34.135	48.7547	52.7689	39.8943
813	0.176486	0.127382	0.16439	0.0958476	0	0.111007	0	0.023012	0	0.301875	33.8207	49.0451	51.6872	40.8292
814	0.179536	0.126822	0.166816	0.0932963	0	0.110556	0	0.0231316	0	0.299843	33.5052	49.3277	50.6012	41.7739
815	0.182618	0.126224	0.169334	0.0907198	0	0.110161	0	0.0232263	0	0.297718	33.1932	49.6143	49.4896	42.738
816	0.185714	0.125639	0.171715	0.0881799	0	0.109687	0	0.0233405	0	0.295724	32.8827	49.8959	48.3771	43.7093
817	0.188837	0.125078	0.174122	0.0856706	0	0.109143	0	0.0234586	0	0.293691	32.5722	50.169	47.2577	44.6875
818	0.191953	0.124441	0.176523	0.0831754	0	0.108689	0	0.0235592	0	0.291659	32.2687	50.4415	46.1305	45.6717
819	0.195142	0.123869	0.178904	0.0806765	0	0.108226	0	0.0236745	0	0.289508	31.9607	50.7098	44.9826	46.6773
820	0.19832	0.123295	0.181276	0.0782016	0	0.10767	0	0.023789	0	0.287448	31.6588	50.9761	43.8317	47.6867
821	0.201505	0.122654	0.183655	0.0757469	0	0.107123	0	0.0239048	0	0.285411	31.3605	51.2384	42.6743	48.7019
822	0.204743	0.122067	0.185997	0.0732937	0	0.106556	0	0.0240161	0	0.283326	31.0615	51.4973	41.5008	49.7345
823	0.207932	0.121437	0.188381	0.0708742	0	0.105927	0	0.0241332	0	0.281316	30.7721	51.7547	40.3314	50.7615
824	0.211188	0.120871	0.190592	0.0684617	0	0.105378	0	0.0242305	0	0.279279	30.4813	52.0072	39.1486	51.8079
825	0.214434	0.120227	0.192944	0.0660735	0	0.104738	0	0.0243441	0	0.27724	30.1947	52.2538	37.9621	52.8536
826	0.217764	0.119658	0.195138	0.0636882	0	0.104096	0	0.024457	0	0.275199	29.9042	52.4943	36.7601	53.9216
827	0.221121	0.119031	0.197358	0.0613377	0	0.103471	0	0.0245732	0	0.273108	29.6144	52.7223	35.5572	54.9906
828	0.224418	0.118377	0.199674	0.0589767	0	0.102822	0	0.0246834	0	0.271049	29.3371	52.9615	34.3436	56.0638
829	0.227758	0.11775	0.201881	0.056654	0	0.102106	0	0.0247987	0	0.269053	29.0589	53.1881	33.1322	57.1417
830	0.23118	0.117195	0.203929	0.0543438	0	0.101388	0	0.0249129	0	0.26705	28.7773	53.4055	31.9111	58.2373
831	0.234599	0.116567	0.206124	0.0520486	0	0.100672	0	0.0250273	0	0.264961	28.5003	53.6169	30.6843	59.3325
832	0.237985	0.115927	0.208292	0.0497727	0	0.0999465	0	0.0251386	0	0.262938	28.2314	53.8291	29.4588	60.427
833	0.241444	0.115326	0.210378	0.0475169	0	0.0991647	0	0.025258	0	0.260912	27.9592	54.0289	28.228	61.5328
834	0.244883	0.114674	0.212512	0.0452539	0	0.0984293	0	0.0253826	0	0.258865	27.6942	54.2337	26.9855	62.6458
835	0.248372	0.11405	0.214544	0.0430268	0	0.0976284	0	0.0254961	0	0.256882	27.4287	54.4244	25.7477	63.7618
836	0.25195	0.113427	0.216573	0.0408033	0	0.0968286	0	0.0256093	0	0.254809	27.1597	54.6028	24.4972	64.8923
837	0.255471	0.112825	0.218636	0.0386008	0	0.0959572	0	0.0257269	0	0.252783	26.9001	54.7832	23.2514	66.0167
838	0.259008	0.112191	0.220633	0.0364012	0	0.0951493	0	0.0258368	0	0.25078	26.6443	54.9627	21.9983	67.15
839	0.262646	0.111564	0.222638	0.0342285	0	0.094258	0	0.0259646	0	0.248702	26.3828	55.1205	20.7447	68.2886
840	0.266213	0.11095	0.224663	0.0320633	0	0.0933788	0	0.0260783	0	0.246654	26.1328	55.2863	19.4909	69.4241
841	0.269923	0.110321	0.226506	0.0299076	0	0.0924875	0	0.026188	0	0.244666	25.8754	55.4337	18.229	70.5794
842	0.273565	0.109707	0.22852	0.0277698	0	0.0915195	0	0.0263007	0	0.242619	25.6276	55.5822	16.9712	71.7232
843	0.277304	0.109097	0.230392	0.0256362	0	0.0905563	0	0.0264308	0	0.240584	25.3761	55.7191	15.706	72.8828
844	0.281037	0.108488	0.23226	0.0235268	0	0.0895942	0	0.026544	0	0.238551	25.1299	55.8496	14.4474	74.0369
845	0.284757	0.107877	0.234119	0.0214202	0	0.0886403	0	0.0266729	0	0.236514	24.8888	55.9819	13.1849	75.1945
846	0.288581	0.107273	0.235989	0.019318	0	0.0876485	0	0.0267866	0	0.234403	24.6444	56.0977	11.9155	76.3621
847	0.29237	0.106659	0.237832	0.0172381	0	0.0866227	0	0.026914	0	0.232364	24.4065	56.2126	10.6544	77.5231
848	0.296224	0.106039	0.239653	0.0151605	0	0.0855743	0	0.0270391	0	0.23031	24.1684	56.3181	9.38789	78.6923
849	0.300152	0.105448	0.241391	0.0131008	0	0.0845241	0	0.0271547	0	0.22823	23.9293	56.4089	8.12548	79.8643
850	0.304025	0.104766	0.243233	0.0110419	0	0.083444	0	0.0272823	0	0.226207	23.6982	56.5053	6.86021	81.0333
851	0.30801	0.104168	0.244946	0.00899533	0	0.0823544	0	0.027412	0	0.224114	23.4636	56.5844	5.59654	82.2103
852	0.311968	0.103564	0.246639	0.00695546	0	0.0812342	0	0.0275395	0	0.222101	23.2354	56.6663	4.33367	83.3871
853	0.316024	0.102964	0.248338	0.00492526	0	0.0800921	0	0.0276512	0	0.220006	23.005	56.73	3.07219	84.5662
854	0.320072	0.102365	0.250034	0.00290127	0	0.0789338	0	0.0277792	0	0.217915	22.779	56.793	1.81171	85.7447
855	0.324182	0.101759	0.251707	0.000884247	0	0.0777535	0	0.0279048	0	0.215809	22.5534	56.8451	0.552678	86.9254
856	0.327454	0.101436	0.252222	0	0	0.0765409	0	0.027964	0	0.214382	22.3613	56.6556	0	87.5101
857	0.329965	0.101286	0.251928	0	0	0.0753026	0	0.0279635	0	0.213555	22.2016	56.2951	0	87.6198
858	0.332573	0.101137	0.251638	0	0	0.0740479	0	0.0279634	0	0.21264	22.038	55.9246	0	87.7313
859	0.335241	0.100904	0.251322	0	0	0.0727769	0	0.0279606	0	0.211795	21.8733	55.5512	0	87.8444
860	0.337861	0.100759	0.251041	0	0	0.0714895	0	0.0279615	0	0.210888	21.7137	55.1887	0	87.9534
861	0.340592	0.100619	0.250627	0	0	0.0702057	0	0.0279639	0	0.209991	21.5501	54.8184	0	88.0695
862	0.343283	0.100468	0.250329	0	0	0.068887	0	0.027963	0	0.20907	21.3911	54.4562	0	88.1788
863	0.346038	0.100308	0.25001	0	0	0.0675538	0	0.0279597	0	0.208131	21.2308	54.0905	0	88.2895
864	0.348869	0.100095	0.2496	0	1.84429e-05	0.0662177	0	0.0279625	0	0.207237	21.0687	53.7215	0	88.4045
865	0.351693	0.100103	0.248751	0	0.000358396	0.0648802	0	0.0279648	0	0.206249	20.9102	53.3684	0	88.5345
866	0.354597	0.10006	0.247812	0	0.00070552	0.0635477	0	0.0279733	0	0.205305	20.7498	53.0115	0	88.6684
867	0.357488	0.10006	0.246942	0	0.00105983	0.0621779	0	0.0279734	0	0.204299	20.5926	52.6597	0	88.798
868	0.360461	0.100009	0.245984	0	0.0014222	0.0608043	0	0.0279799	0	0.20334	20.4333	52.3038	0	88.9315
869	0.363412	0.100026	0.24501	0	0.00179159	0.0594087	0	0.0279846	0	0.202367	20.2777	51.956	0	89.0634
870	0.366488	0.0999764	0.244056	0	0.00216902	0.0579997	0	0.0279916	0	0.201319	20.1179	51.5968	0	89.1963
871	0.369535	0.099919	0.243081	0	0.00255417	0.0565676	0	0.0279963	0	0.200346	19.9621	51.2467	0	89.3277
872	0.372706	0.0999437	0.24198	0	0.00294853	0.0551217	0	0.0280033	0	0.199296	19.8027	50.8889	0	89.4652
873	0.375856	0.099888	0.241009	0	0.00335062	0.0536541	0	0.0280085	0	0.198234	19.6467	50.5361	0	89.5957
874	0.37904	0.0999156	0.239914	0	0.00376094	0.0521641	0	0.0280162	0	0.197189	19.4915	50.1867	0	89.73
875	0.382312	0.0998668	0.238813	0	0.00418137	0.0506634	0	0.0280234	0	0.19614	19.3346	49.832	0	89.8649
876	0.385596	0.0998951	0.237718	0	0.00460989	0.0491456	0	0.0280313	0	0.195004	19.1796	49.4808	0	89.9982
877	0.388939	0.0998396	0.2366	0	0.00504814	0.0475958	0	0.0280366	0	0.19394	19.0245	49.1285	0	90.1321
878	0.392323	0.0997941	0.235506	0	0.00549597	0.0460323	0	0.0280447	0	0.192804	18.8698	48.7763	0	90.2644
879	0.395739	0.0998071	0.234374	0	0.00595198	0.0444432	0	0.0280484	0	0.191637	18.7163	48.4263	0	90.397
880	0.39925	0.0997693	0.233151	0	0.00641959	0.0428372	0	0.0280587	0	0.190514	18.5612	48.0727	0	90.5332
881	0.402793	0.09979	0.23189	0	0.00689642	0.0412056	0	0.0280645	0	0.18936	18.4073	47.7217	0	90.6697
882	0.406312	0.0997299	0.230759	0	0.00738296	0.0395532	0	0.0280686	0	0.188194	18.2568	47.3761	0	90.7994
883	0.409982	0.0997581	0.229369	0	0.00788182	0.0378789	0	0.0280765	0	0.187054	18.1027	47.0244	0	90.9395
884	0.413666	0.0997146	0.22813	0	0.00839118	0.0361869	0	0.0280852	0	0.185826	17.9504	46.6739	0	91.0727
885	0.41736	0.0996727	0.226894	0	0.00891099	0.0344678	0	0.0280944	0	0.1846	17.8002	46.3277	0	91.2044
886	0.421142	0.0997037	0.225508	0	0.0094432	0.0327293	0	0.0281032	0	0.183371	17.6492	45.9805	0	91.341
887	0.425022	0.0996607	0.224122	0	0.00998689	0.0309544	0	0.0281121	0	0.182142	17.4968	45.6289	0	91.4778
888	0.428912	0.0996938	0.222739	0	0.0105422	0.0291698	0	0.0281214	0	0.180823	17.3467	45.2818	0	91.6127
889	0.432859	0.0996435	0.221335	0	0.0111091	0.0273462	0	0.0281283	0	0.179579	17.197	44.9349	0	91.7476
890	0.436819	0.09967	0.219935	0	0.0116899	0.0255044	0	0.0281357	0	0.178246	17.0494	44.5922	0	91.8807
891	0.44094	0.0996369	0.218422	0	0.0122839	0.0236296	0	0.0281475	0	0.17694	16.8984	44.2417	0	92.0186
892	0.445087	0.0996623	0.216873	0	0.0128875	0.021732	0	0.0281547	0	0.175604	16.7493	43.895	0	92.1562
893	0.449318	0.0996312	0.215362	0	0.013505	0.0198103	0	0.028167	0	0.174206	16.5997	43.5457	0	92.2919
894	0.453531	0.0996494	0.213794	0	0.0141417	0.0178557	0	0.0281721	0	0.172856	16.4535	43.2045	0	92.4273
895	0.457828	0.0996109	0.212265	0	0.0147924	0.0158765	0	0.0281824	0	0.171444	16.3069	42.8609	0	92.5609
896	0.462216	0.0996457	0.210586	0	0.0154545	0.0138601	0	0.0282089	0	0.170029	16.1598	42.5173	0	92.6988
897	0.466703	0.0996062	0.208906	0	0.0161283	0.0118244	0	0.0282189	0	0.168613	16.0123	42.1709	0	92.8362
898	0.471207	0.0996445	0.207232	0	0.0168253	0.00975201	0	0.0282298	0	0.16711	15.8669	41.8288	0	92.9718
899	0.475808	0.0996078	0.205555	0	0.017534	0.00764944	0	0.0282406	0	0.165604	15.721	41.4844	0	93.1068
900	0.480505	0.0996457	0.203731	0	0.0182544	0.0055149	0	0.0282514	0	0.164097	15.5749	41.1402	0	93.2458
901	0.485247	0.099617	0.201922	0	0.0189992	0.00334778	0	0.0282645	0	0.162603	15.4301	40.7981	0	93.3828
902	0.490014	0.0996485	0.200082	0	0.0197529	0.00114634	0	0.0282734	0	0.161083	15.2873	40.4602	0	93.5192
903	0.493344	0.0997875	0.198012	0	0.0205808	0	0	0.0282916	0	0.159985	15.1898	40.2362	0	93.6335
904	0.494795	0.100096	0.195831	0	0.0214921	0	0	0.0283153	0	0.159471	15.1489	40.1542	0	93.7173
905	0.496258	0.100464	0.193613	0	0.0224012	0	0	0.0283342	0	0.158929	15.108	40.0719	0	93.8019
906	0.497755	0.100763	0.191405	0	0.0233242	0	0	0.028355	0	0.158397	15.0662	39.9873	0	93.8864
907	0.499332	0.101154	0.189075	0	0.0242635	0	0	0.0283802	0	0.157796	15.0225	39.8988	0	93.975
908	0.500822	0.101452	0.186856	0	0.0252112	0	0	0.0284004	0	0.157258	14.9814	39.8155	0	94.059
909	0.502398	0.101823	0.184482	0	0.0261597	0	0	0.02842	0	0.156716	14.9383	39.7283	0	94.1483
910	0.504003	0.102145	0.182149	0	0.0271384	0	0	0.0284465	0	0.156119	14.8944	39.6388	0	94.2362
911	0.505642	0.102529	0.17964	0	0.0281267	0	0	0.0284694	0	0.155593	14.8501	39.5494	0	94.3294
912	0.507194	0.102839	0.177278	0	0.0291281	0	0	0.0284927	0	0.155068	14.8083	39.4649	0	94.4168
913	0.508873	0.103232	0.174774	0	0.0301442	0	0	0.0285177	0	0.154458	14.7634	39.3733	0	94.5095
914	0.510508	0.103616	0.17225	0	0.0311592	0	0	0.0285401	0	0.153927	14.7199	39.2855	0	94.6018
915	0.512182	0.104007	0.169734	0	0.0322006	0	0	0.0285645	0	0.153311	14.6757	39.1953	0	94.6939
916	0.513968	0.104346	0.167101	0	0.0332621	0	0	0.0285951	0	0.152728	14.6286	39.0988	0	94.7902
917	0.515634	0.104717	0.16454	0	0.0343227	0	0	0.0286135	0	0.152172	14.5852	39.0105	0	94.8827
918	0.517376	0.105123	0.161881	0	0.0354074	0	0	0.0286414	0	0.151571	14.54	38.9183	0	94.9784
919	0.519152	0.105516	0.159197	0	0.0365011	0	0	0.0286827	0	0.15095	14.494	38.8245	0	95.0747
920	0.52096	0.105936	0.156398	0	0.0376283	0	0	0.0287139	0	0.150364	14.4477	38.7303	0	95.1743
921	0.522818	0.106346	0.153577	0	0.0387542	0	0	0.0287425	0	0.149763	14.4004	38.6333	0	95.2744
922	0.524589	0.106738	0.150874	0	0.0398982	0	0	0.0287662	0	0.149134	14.3556	38.5414	0	95.3699
923	0.526457	0.107227	0.147939	0	0.0410514	0	0	0.028795	0	0.148531	14.3088	38.446	0	95.4725
924	0.528333	0.107641	0.145044	0	0.0422299	0	0	0.0288242	0	0.147928	14.262	38.3501	0	95.5735
925	0.530275	0.108049	0.14209	0	0.0434196	0	0	0.0288516	0	0.147315	14.2138	38.2507	0	95.6763
926	0.532188	0.108471	0.139101	0	0.0446396	0	0	0.0288824	0	0.146717	14.1667	38.1542	0	95.7794
927	0.534125	0.108955	0.136057	0	0.0458556	0	0	0.0289092	0	0.146098	14.1194	38.0573	0	95.8837
928	0.536127	0.109375	0.132963	0	0.0471021	0	0	0.0289393	0	0.145494	14.0708	37.957	0	95.9895
929	0.538101	0.109867	0.129824	0	0.0483597	0	0	0.0289678	0	0.14488	14.0233	37.8596	0	96.0958
930	0.540184	0.110304	0.126659	0	0.0496524	0	0	0.029002	0	0.144199	13.9733	37.7557	0	96.2031
931	0.542186	0.110801	0.123436	0	0.05094	0	0	0.0290489	0	0.143587	13.9256	37.6585	0	96.3109
932	0.544359	0.111237	0.120163	0	0.05226	0	0	0.0290824	0	0.142898	13.8742	37.5509	0	96.4208
933	0.546456	0.111735	0.116819	0	0.0535979	0	0	0.0291116	0	0.142282	13.8252	37.4499	0	96.5316
934	0.548583	0.112258	0.113448	0	0.0549624	0	0	0.0291474	0	0.1416	13.7757	37.3476	0	96.6428
935	0.550725	0.112765	0.110007	0	0.0563329	0	0	0.0291788	0	0.14099	13.7263	37.2457	0	96.7555
936	0.55303	0.113209	0.106525	0	0.0577241	0	0	0.0292133	0	0.140299	13.6733	37.1343	0	96.8697
937	0.555275	0.113737	0.102979	0	0.0591451	0	0	0.0292497	0	0.139614	13.6222	37.0281	0	96.9848
938	0.557529	0.114267	0.0993956	0	0.0605932	0	0	0.0292863	0	0.138929	13.5714	36.9223	0	97.1003
939	0.559806	0.114782	0.0957283	0	0.0620475	0	0	0.0293188	0	0.138317	13.5204	36.8166	0	97.2177
940	0.562109	0.115381	0.0919957	0	0.0635306	0	0	0.0293699	0	0.137614	13.4691	36.7105	0	97.3364
941	0.564483	0.115916	0.0882342	0	0.0650362	0	0	0.0294071	0	0.136924	13.4168	36.6009	0	97.4556
942	0.566898	0.11646	0.0843925	0	0.0665614	0	0	0.0294462	0	0.136242	13.3639	36.4902	0	97.5766
943	0.569415	0.117005	0.0805095	0	0.0681252	0	0	0.0294853	0	0.13546	13.3091	36.3743	0	97.6985
944	0.57184	0.117629	0.0765398	0	0.0696931	0	0	0.0295245	0	0.134773	13.257	36.2657	0	97.8216
945	0.574365	0.118176	0.0725131	0	0.0712995	0	0	0.0295635	0	0.134083	13.2031	36.1522	0	97.9461
946	0.576925	0.11873	0.0684178	0	0.0729254	0	0	0.0296041	0	0.133398	13.1488	36.038	0	98.0718
947	0.579557	0.119357	0.0642616	0	0.0745748	0	0	0.029643	0	0.132606	13.0935	35.9208	0	98.1987
948	0.582119	0.119991	0.06002	0	0.0762548	0	0	0.0297008	0	0.131915	13.0401	35.8094	0	98.3271
949	0.584863	0.120563	0.0557279	0	0.0779612	0	0	0.029745	0	0.131141	12.9833	35.6883	0	98.4565
950	0.587542	0.1212	0.0513397	0	0.0796863	0	0	0.0297856	0	0.130446	12.9285	35.5729	0	98.5876
951	0.5903	0.121854	0.0468989	0	0.0814495	0	0	0.02983	0	0.129667	12.8725	35.4541	0	98.7196
952	0.593098	0.122517	0.04237	0	0.0832459	0	0	0.029876	0	0.128893	12.8162	35.3346	0	98.8532
953	0.59591	0.123162	0.0377592	0	0.0850579	0	0	0.0299175	0	0.128194	12.7602	35.2159	0	98.9882
954	0.598817	0.123827	0.0330785	0	0.0868996	0	0	0.0299635	0	0.127414	12.7027	35.0932	0	99.1245
955	0.601739	0.124495	0.0283216	0	0.0887832	0	0	0.0300277	0	0.126633	12.6453	34.9712	0	99.2619
956	0.604721	0.125176	0.0234742	0	0.0906921	0	0	0.0300768	0	0.12586	12.5875	34.8475	0	99.401
957	0.607777	0.125852	0.0185321	0	0.0926374	0	0	0.0301243	0	0.125077	12.5287	34.7214	0	99.5419
958	0.610817	0.126604	0.0135129	0	0.0946086	0	0	0.0301707	0	0.124287	12.4708	34.5978	0	99.6838
959	0.614008	0.127308	0.00840378	0	0.096632	0	0	0.0302243	0	0.123424	12.4105	34.4676	0	99.8273
960	0.617129	0.128077	0.00320097	0	0.0986614	0	0	0.0302918	0	0.12264	12.3522	34.3431	0	99.9723
961	0.619789	0.128372	0	0	0.0996356	0	0	0.0303236	0	0.12188	12.3022	34.226	0	100.061
962	0.621471	0.128046	0	0	0.0988796	0	0	0.0303222	0	0.121281	12.2695	34.1334	0	100.061
963	0.62331	0.127651	0	0	0.0981207	0	0	0.0303235	0	0.120595	12.234	34.0327	0	100.061
964	0.625061	0.127338	0	0	0.0973636	0	0	0.0303255	0	0.119912	12.2003	33.9374	0	100.061
965	0.626838	0.126931	0	0	0.096595	0	0	0.0303238	0	0.119313	12.1664	33.8412	0	100.061
966	0.628589	0.126618	0	0	0.0958378	0	0	0.0303258	0	0.118629	12.1331	33.7469	0	100.061
967	0.630374	0.126212	0	0	0.0950585	0	0	0.0303245	0	0.118031	12.0994	33.6513	0	100.061
968	0.632228	0.12582	0	0	0.0942777	0	0	0.0303265	0	0.117348	12.0646	33.5526	0	100.061
969	0.634032	0.125498	0	0	0.0934893	0	0	0.0303262	0	0.116655	12.0309	33.4572	0	100.061
970	0.635886	0.125106	0	0	0.0927084	0	0	0.0303282	0	0.115971	11.9964	33.3596	0	100.061
971	0.637667	0.124699	0	0	0.0919166	0	0	0.0303446	0	0.115373	11.9634	33.2665	0	100.061
972	0.639478	0.124378	0	0	0.0911174	0	0	0.0303446	0	0.114681	11.9301	33.1722	0	100.061
973	0.641377	0.123975	0	0	0.0903163	0	0	0.030344	0	0.113988	11.8954	33.074	0	100.061
974	0.643248	0.123586	0	0	0.0895135	0	0	0.0303468	0	0.113307	11.8615	32.9779	0	100.061
975	0.645146	0.123182	0	0	0.0887124	0	0	0.0303461	0	0.112613	11.8272	32.8808	0	100.061
976	0.647017	0.122793	0	0	0.0879093	0	0	0.0303489	0	0.111931	11.7936	32.7857	0	100.061
977	0.64888	0.122463	0	0	0.0870794	0	0	0.0303466	0	0.111231	11.7604	32.6916	0	100.061
978	0.650786	0.122061	0	0	0.0862675	0	0	0.0303463	0	0.110539	11.7265	32.5958	0	100.061
979	0.6527	0.121661	0	0	0.0854447	0	0	0.0303464	0	0.109848	11.6927	32.5002	0	100.061
980	0.654603	0.121258	0	0	0.0846204	0	0	0.0303638	0	0.109155	11.6592	32.4058	0	100.061
981	0.65659	0.120871	0	0	0.0837949	0	0	0.0303673	0	0.108377	11.6246	32.3077	0	100.061
982	0.658504	0.120471	0	0	0.082972	0	0	0.0303674	0	0.107685	11.5914	32.2138	0	100.061
983	0.66048	0.120001	0	0	0.0821447	0	0	0.0303703	0	0.107004	11.5573	32.1174	0	100.061
984	0.662436	0.11959	0	0	0.0813026	0	0	0.0303677	0	0.106303	11.5238	32.0226	0	100.061
985	0.664424	0.119203	0	0	0.0804766	0	0	0.0303711	0	0.105525	11.4899	31.9268	0	100.061
986	0.666381	0.118792	0	0	0.0796346	0	0	0.0303685	0	0.104824	11.4567	31.833	0	100.061
987	0.668344	0.118382	0	0	0.0787817	0	0	0.0303663	0	0.104125	11.4237	31.7395	0	100.061
988	0.670387	0.117924	0	0	0.0779618	0	0	0.0303722	0	0.103355	11.3894	31.6428	0	100.061
989	0.672339	0.117513	0	0	0.0771076	0	0	0.0303873	0	0.102654	11.3568	31.5509	0	100.061
990	0.674361	0.117114	0	0	0.0762734	0	0	0.0303877	0	0.101865	11.3234	31.4563	0	100.061
991	0.676445	0.116645	0	0	0.0754343	0	0	0.0303909	0	0.101085	11.2891	31.3594	0	100.061
992	0.678409	0.116235	0	0	0.0745816	0	0	0.0303886	0	0.100386	11.257	31.2687	0	100.061
993	0.680494	0.115767	0	0	0.0737422	0	0	0.0303918	0	0.0996057	11.2231	31.1728	0	100.061
994	0.682489	0.115346	0	0	0.0728823	0	0	0.0303865	0	0.0988967	11.1908	31.0817	0	100.061
995	0.684587	0.114879	0	0	0.0720443	0	0	0.0303903	0	0.0980989	11.1571	30.9864	0	100.061
996	0.686628	0.114466	0	0	0.0712014	0	0	0.0303871	0	0.0973177	11.1245	30.8943	0	100.061
997	0.688688	0.113993	0	0	0.0703591	0	0	0.030407	0	0.0965536	11.0917	30.8019	0	100.061
998	0.690798	0.113511	0	0	0.0695116	0	0	0.0304068	0	0.0957725	11.0584	30.7079	0	100.061
999	0.692822	0.113112	0	0	0.0686655	0	0	0.0304073	0	0.0949933	11.0266	30.6181	0	100.061
1000	0.694924	0.112629	0	0	0.0678291	0	0	0.0304068	0	0.0942111	10.9938	30.5255	0	100.061

## Sheet: Melt-extracted at 0.7 GPa
Temperature (°C)	Model fraction of minerals (wt%)								CW in melt (ppm)	CSn in melt (ppm)	Model fraction of Sn in Bi (wt%)	Model fraction of Sn in melt (wt%)
	Melt	G	Bi	Ksp	Pl	Ilm	Sill	Q
717	2.50738e-05	0	0.381916	0.03347	0.0270445	0.00947976	0.0708992	0.477166	49.5227	23.453	98.0206	0.00277384
718	8.14674e-05	0	0.381912	0.0335059	0.0270059	0.00944905	0.0709788	0.477067	49.5092	23.4523	98.0168	0.00901225
719	0.000138246	0	0.381837	0.033545	0.0269699	0.00942091	0.0710765	0.477013	49.5042	23.4558	98.0124	0.0152956
720	0.000195357	0	0.381828	0.0335805	0.026931	0.00939008	0.0711668	0.476908	49.491	23.4554	98.0085	0.0216141
721	0.000252852	0	0.381824	0.0336164	0.0268924	0.00935936	0.0712463	0.476809	49.4772	23.4548	98.0045	0.0279744
722	0.000310629	0	0.381815	0.0336519	0.0268536	0.00932853	0.0713365	0.476704	49.4638	23.4543	98.0006	0.034366
723	0.00036892	0	0.38174	0.033691	0.0268175	0.00929869	0.0714342	0.476649	49.4585	23.4578	97.996	0.0408211
724	0.000427467	0	0.381735	0.0337268	0.0267789	0.00926964	0.0715136	0.476549	49.4443	23.4572	97.9919	0.047298
725	0.000486394	0	0.381729	0.0337535	0.0267402	0.00923889	0.0716044	0.476448	49.4302	23.4566	97.9879	0.0538167
726	0.00054571	0	0.381623	0.0337897	0.0267019	0.00920827	0.0716847	0.476447	49.4288	23.462	97.9832	0.0603936
727	0.000605393	0	0.381613	0.0338252	0.026663	0.00917742	0.0717747	0.476341	49.4149	23.4616	97.979	0.0669977
728	0.000665449	0	0.381599	0.0338602	0.0266333	0.00914817	0.0718639	0.47623	49.4014	23.4613	97.9742	0.073643
729	0.000725906	0	0.381597	0.0338872	0.0265949	0.00911751	0.0719439	0.476134	49.3864	23.4604	97.97	0.0803305
730	0.000786812	0	0.381521	0.0339262	0.0265587	0.00908763	0.0720415	0.476078	49.3804	23.4639	97.9651	0.0870834
731	0.00084803	0	0.381516	0.033962	0.0265201	0.00905688	0.0721208	0.475977	49.3656	23.4632	97.9608	0.0938562
732	0.000909529	0	0.381508	0.0339886	0.0264813	0.00902779	0.0722112	0.475874	49.3508	23.4626	97.9564	0.10066
733	0.000971029	0	0.381502	0.0340243	0.0264426	0.00899703	0.0722905	0.475772	49.336	23.462	97.9521	0.107463
734	0.00103426	0	0.38143	0.0340636	0.0264067	0.00896722	0.0723773	0.475721	49.3289	23.4652	97.9469	0.114477
735	0.00109643	0	0.381422	0.0340902	0.0263679	0.00893812	0.0724677	0.475617	49.3139	23.4646	97.9425	0.121355
736	0.00115956	0	0.381416	0.0341259	0.0263292	0.00890736	0.0725468	0.475515	49.2986	23.4639	97.938	0.128338
737	0.00122256	0	0.381373	0.0341492	0.0262879	0.00887574	0.0726304	0.475462	49.2882	23.4655	97.9335	0.135321
738	0.00128677	0	0.3813	0.0341885	0.026252	0.0088459	0.0727172	0.47541	49.2808	23.4687	97.9283	0.142447
739	0.00135085	0	0.381296	0.0342154	0.0262134	0.0088169	0.0727968	0.475311	49.2648	23.4678	97.9237	0.149536
740	0.00141492	0	0.381288	0.0342419	0.0261746	0.0087861	0.0728872	0.475207	49.2495	23.4672	97.919	0.156624
741	0.00147995	0	0.381281	0.0342775	0.0261359	0.00875533	0.0729661	0.475104	49.2338	23.4665	97.9143	0.163817
742	0.00154515	0	0.381211	0.034308	0.0261001	0.00872555	0.0730535	0.475056	49.2257	23.4695	97.909	0.171056
743	0.00160924	0	0.381207	0.0343349	0.0260616	0.00869655	0.0731331	0.474957	49.2097	23.4687	97.9044	0.178145
744	0.00167428	0	0.381204	0.0343618	0.026023	0.00866585	0.0732128	0.474859	49.1936	23.4678	97.8997	0.185338
745	0.00174027	0	0.3812	0.0343886	0.0259845	0.00863514	0.0732924	0.47476	49.1773	23.4669	97.8949	0.192636
746	0.00180739	0	0.381125	0.0344187	0.0259484	0.00860524	0.0733903	0.474705	49.1693	23.4702	97.8894	0.200093
747	0.00187417	0	0.381084	0.0344422	0.0259073	0.0085754	0.0734628	0.474654	49.1572	23.4715	97.8845	0.207498
748	0.0019411	0	0.381076	0.0344778	0.0258685	0.00854461	0.0735416	0.47455	49.141	23.4708	97.8795	0.214901
749	0.00200995	0	0.381071	0.0345045	0.0258299	0.00851388	0.073621	0.47445	49.124	23.4699	97.8744	0.222516
750	0.00207904	0	0.381003	0.0345352	0.0257847	0.00848582	0.0737087	0.474404	49.1144	23.4729	97.8693	0.230193
751	0.0021479	0	0.380998	0.0345619	0.025746	0.00845508	0.0737881	0.474303	49.0973	23.472	97.8642	0.237808
752	0.00221771	0	0.380992	0.0345886	0.0257074	0.00842435	0.0738674	0.474203	49.08	23.4711	97.8589	0.245528
753	0.00228846	0	0.380985	0.0346152	0.0256687	0.00839529	0.0739465	0.4741	49.0624	23.4702	97.8536	0.253352
754	0.0023604	0	0.380909	0.0346452	0.0256324	0.00836533	0.0740441	0.474044	49.0532	23.4734	97.8476	0.261353
755	0.00243212	0	0.380903	0.0346718	0.0255937	0.00833457	0.0741232	0.473942	49.0354	23.4725	97.8422	0.269283
756	0.00250481	0	0.380899	0.0346896	0.0255552	0.00830557	0.0742029	0.473843	49.0168	23.4715	97.8367	0.277319
757	0.00257843	0	0.380892	0.0347162	0.0255165	0.0082748	0.0742819	0.473741	48.9986	23.4705	97.831	0.285459
758	0.00265209	0	0.380783	0.0347432	0.025478	0.00824414	0.0743618	0.473738	48.993	23.4757	97.8248	0.293678
759	0.00272764	0	0.380778	0.03477	0.0254299	0.00821512	0.0744412	0.473638	48.9737	23.4748	97.8196	0.302031
760	0.00280313	0	0.380766	0.0347961	0.0253908	0.00818424	0.0745307	0.473529	48.9555	23.4741	97.8137	0.310382
761	0.0028799	0	0.380692	0.0348262	0.0253546	0.00815601	0.0746173	0.473474	48.9444	23.4771	97.8072	0.318924
762	0.00295638	0	0.380684	0.0348527	0.0253158	0.00812522	0.074696	0.47337	48.9255	23.4762	97.8012	0.327381
763	0.00303384	0	0.380678	0.0348703	0.0252772	0.00809618	0.0747753	0.473269	48.9058	23.4751	97.7952	0.335942
764	0.0031132	0	0.380672	0.034897	0.025229	0.00806545	0.0748546	0.473169	48.8857	23.4741	97.7896	0.344715
765	0.00319283	0	0.380593	0.0349267	0.0251925	0.0080354	0.0749517	0.473108	48.8746	23.4774	97.7827	0.353582
766	0.00327216	0	0.380583	0.034953	0.0251536	0.00800628	0.0750301	0.473002	48.8548	23.4765	97.7765	0.362353
767	0.00335343	0	0.380576	0.0349705	0.0251149	0.00797552	0.0751092	0.4729	48.8343	23.4753	97.77	0.371335
768	0.00343565	0	0.380569	0.0349971	0.0250665	0.00794645	0.0751881	0.472797	48.8134	23.4744	97.7641	0.380423
769	0.0035182	0	0.380492	0.0350179	0.0250302	0.00791645	0.0752858	0.472739	48.8011	23.4774	97.757	0.389614
770	0.00360229	0	0.38048	0.035044	0.0249912	0.00788729	0.0753638	0.472631	48.7802	23.4765	97.7502	0.39891
771	0.00368637	0	0.380469	0.0350702	0.0249521	0.00785813	0.0754419	0.472523	48.7593	23.4756	97.7434	0.408206
772	0.00377188	0	0.380399	0.0350916	0.0249066	0.00782826	0.0755294	0.472474	48.7453	23.4783	97.7366	0.417723
773	0.00529962	0.00281399	0.378058	0.0362379	0.0242093	0.00791314	0.0755123	0.469956	48.5236	23.5771	97.5438	0.589384
774	0.00818304	0.00821344	0.374992	0.0385106	0.0230389	0.0081351	0.0757163	0.463211	47.9415	23.6796	97.1736	0.914015
775	0.0109782	0.0134737	0.368499	0.0403529	0.0216973	0.00827928	0.0752083	0.461512	47.8101	24.0035	96.7973	1.243
776	0.0137398	0.0186214	0.362165	0.0421008	0.0204136	0.00842084	0.0747052	0.459833	47.672	24.3267	96.4145	1.57662
777	0.0164617	0.0236807	0.355972	0.0437805	0.0191768	0.00856111	0.0742149	0.458152	47.5309	24.6503	96.0262	1.91409
778	0.0193457	0.0289159	0.353144	0.0458066	0.0181768	0.00878293	0.0744164	0.451411	46.9467	24.7446	95.6281	2.25804
779	0.0220472	0.0338352	0.34703	0.0473577	0.0170343	0.008922	0.0739388	0.449835	46.8083	25.0739	95.2227	2.60759
780	0.0247198	0.0386602	0.341058	0.0488428	0.0159375	0.00905991	0.0734629	0.448259	46.6641	25.4026	94.8109	2.96202
781	0.0273728	0.0434059	0.33522	0.0502529	0.0148858	0.00919486	0.0729879	0.44668	46.5121	25.7306	94.3914	3.32226
782	0.0302892	0.0485407	0.33252	0.0521023	0.0140002	0.00941652	0.0731976	0.439934	45.9309	25.8218	93.9628	3.68925
783	0.0329237	0.053181	0.326745	0.0534124	0.0130117	0.00955353	0.0727325	0.438441	45.7828	26.1562	93.5267	4.06207
784	0.0355471	0.0577561	0.321089	0.0546735	0.0120574	0.0096872	0.072265	0.436924	45.6268	26.4903	93.082	4.44178
785	0.0381643	0.0622593	0.315492	0.0558846	0.0111293	0.00982053	0.0718051	0.435445	45.468	26.8287	92.6277	4.82971
786	0.0407556	0.0667051	0.309943	0.0570448	0.0102454	0.00995496	0.0713619	0.43399	45.3125	27.1724	92.1642	5.22373
787	0.0437494	0.0717348	0.307351	0.0586995	0.00946342	0.0101801	0.0715662	0.427256	44.7301	27.2614	91.6926	5.6258
788	0.0463381	0.0760868	0.30192	0.0597818	0.00862249	0.0103137	0.0711115	0.425825	44.5691	27.6063	91.2121	6.03407
789	0.0489298	0.080383	0.296535	0.060823	0.00780527	0.010445	0.070662	0.424417	44.4045	27.956	90.7199	6.45227
790	0.0515167	0.0846264	0.291201	0.0618164	0.00701163	0.0105778	0.0702081	0.423042	44.2376	28.3102	90.2169	6.87946
791	0.0545838	0.0896146	0.288633	0.0633536	0.00629914	0.010808	0.0704094	0.416298	43.6618	28.4007	89.7074	7.31235
792	0.0571662	0.0937769	0.283404	0.0642763	0.00554376	0.0109412	0.0699635	0.414928	43.492	28.7569	89.1866	7.75434
793	0.0597433	0.0978867	0.27822	0.0651601	0.00480943	0.0110738	0.0695233	0.413584	43.3208	29.118	88.6547	8.2057
794	0.0623181	0.101934	0.273153	0.066007	0.0040945	0.0112049	0.0690698	0.412219	43.141	29.4773	88.1142	8.66495
795	0.0654774	0.106892	0.270606	0.0674413	0.00343066	0.0114401	0.0692555	0.405457	42.5695	29.5689	87.5638	9.13253
796	0.0680636	0.11087	0.26557	0.0682256	0.00274762	0.0115728	0.0688066	0.404144	42.3908	29.9358	87.0006	9.61102
797	0.0706447	0.114797	0.260576	0.0689806	0.00208119	0.011705	0.068363	0.402853	42.2114	30.3079	86.4257	10.0995
798	0.0732136	0.118661	0.255699	0.0696995	0.00143191	0.0118355	0.0679174	0.401542	42.0262	30.678	85.8437	10.5946
799	0.0757842	0.122501	0.250781	0.0703958	0.000799183	0.0119683	0.0674828	0.400288	41.846	31.0613	85.2444	11.1036
800	0.0790618	0.127423	0.248237	0.0717088	0.000183038	0.0122104	0.0676505	0.393525	41.2815	31.1565	84.6384	11.6193
801	0.0804799	0.129174	0.243328	0.0715388	0	0.0122221	0.0668577	0.3964	41.3868	31.6113	84.1757	12.0004
802	0.0822375	0.131417	0.240731	0.07178	0	0.0123106	0.0666105	0.394913	41.2032	31.7949	83.7608	12.3336
803	0.0840325	0.133676	0.23822	0.0720063	0	0.0124014	0.0663581	0.393306	41.0053	31.969	83.3412	12.6719
804	0.0858404	0.135955	0.235601	0.0722295	0	0.0124948	0.0661035	0.391776	40.8154	32.1566	82.9084	13.0205
805	0.0876952	0.138265	0.232993	0.0724463	0	0.0125886	0.0658405	0.390171	40.6161	32.3425	82.4647	13.3787
806	0.089577	0.140604	0.230394	0.072673	0	0.0126874	0.0655792	0.388486	40.4117	32.5279	82.0123	13.7441
807	0.0914833	0.142952	0.227693	0.07289	0	0.012786	0.0653065	0.38689	40.2126	32.7262	81.5447	14.1222
808	0.093426	0.145329	0.225	0.0731083	0	0.012888	0.0650356	0.385213	40.0068	32.9237	81.0668	14.5091
809	0.0953938	0.147675	0.22231	0.0733261	0	0.0129931	0.0647648	0.383538	39.7977	33.1223	80.5807	14.9041
810	0.0974292	0.150127	0.219573	0.0735271	0	0.0130968	0.0644687	0.381778	39.5802	33.3245	80.0747	15.315
811	0.0993892	0.152605	0.216782	0.0737338	0	0.0132062	0.064186	0.380097	39.3839	33.5396	79.5673	15.724
812	0.101514	0.155055	0.21396	0.0739193	0	0.0133149	0.063882	0.378356	39.1598	33.753	79.0309	16.1622
813	0.103561	0.157527	0.211177	0.0741257	0	0.0134289	0.0635893	0.376591	38.9496	33.968	78.4999	16.5931
814	0.1057	0.160002	0.208304	0.0743173	0	0.013545	0.0632883	0.374843	38.7305	34.1922	77.943	17.0478
815	0.107826	0.162456	0.205513	0.0745088	0	0.0136626	0.0629804	0.373053	38.5105	34.4098	77.388	17.5012
816	0.110027	0.16503	0.2026	0.0746741	0	0.0137801	0.0626657	0.371224	38.2869	34.6408	76.8033	17.9783
817	0.112251	0.167497	0.19974	0.074857	0	0.0139039	0.0623555	0.369396	38.058	34.8675	76.2147	18.4618
818	0.114538	0.170066	0.196737	0.0750228	0	0.0140278	0.0620317	0.367577	37.8299	35.1119	75.595	18.9701
819	0.116743	0.172649	0.193862	0.0751791	0	0.0141529	0.0617041	0.36571	37.6101	35.347	74.9889	19.4648
820	0.119118	0.175213	0.190872	0.0753288	0	0.0142815	0.0613716	0.363815	37.3705	35.5912	74.3426	19.9978
821	0.12142	0.177807	0.187923	0.0754925	0	0.0144143	0.0610403	0.361902	37.1433	35.8371	73.6997	20.5253
822	0.123786	0.180503	0.184838	0.0756232	0	0.0145456	0.060697	0.360007	36.9167	36.101	73.0236	21.0792
823	0.126164	0.183076	0.181882	0.0757634	0	0.0146817	0.0603618	0.358071	36.6823	36.3506	72.3526	21.6327
824	0.128604	0.185752	0.178794	0.0758713	0	0.0148165	0.0600045	0.356157	36.4485	36.6181	71.6476	22.2135
825	0.131059	0.188307	0.175837	0.0759895	0	0.0149562	0.059645	0.354207	36.207	36.8706	70.9482	22.7935
826	0.133596	0.190993	0.172675	0.0760962	0	0.0150985	0.0592949	0.352246	35.9675	37.1505	70.2016	23.4111
827	0.136132	0.193679	0.169623	0.0761955	0	0.0152408	0.0589246	0.350206	35.7241	37.4181	69.4573	24.0274
828	0.138651	0.196342	0.166559	0.0762787	0	0.0153863	0.0585601	0.348224	35.4875	37.6929	68.7035	24.6517
829	0.141196	0.199043	0.163434	0.0763612	0	0.0155365	0.0581979	0.346231	35.2532	37.979	67.9264	25.2948
830	0.143803	0.201704	0.160385	0.0764296	0	0.0156853	0.0578147	0.344178	35.0077	38.2537	67.1413	25.9481
831	0.146499	0.204367	0.157244	0.0764825	0	0.0158375	0.0574335	0.342137	34.7572	38.5411	66.3209	26.6333
832	0.149116	0.207045	0.154122	0.0765343	0	0.0159925	0.0570585	0.340132	34.5211	38.8352	65.5003	27.3157
833	0.151786	0.209814	0.150972	0.0765606	0	0.0161519	0.0566606	0.338055	34.281	39.1336	64.6545	28.0185
834	0.154552	0.212453	0.147838	0.0765837	0	0.0162993	0.0562675	0.336006	34.0302	39.4285	63.7894	28.7442
835	0.15733	0.215109	0.144723	0.0765975	0	0.0164642	0.0558699	0.333905	33.7791	39.7235	62.9127	29.4798
836	0.160099	0.217895	0.141509	0.0766002	0	0.0166283	0.055471	0.331797	33.5382	40.0395	62.0047	30.2373
837	0.162851	0.220659	0.138387	0.0765794	0	0.0167907	0.0550682	0.329665	33.2981	40.3457	61.1007	30.9921
838	0.165715	0.223316	0.135194	0.0765632	0	0.0169558	0.0546645	0.327591	33.0499	40.6622	60.1591	31.7847
839	0.168628	0.226057	0.131975	0.0765211	0	0.0171328	0.0542382	0.325447	32.7991	40.9836	59.1908	32.599
840	0.171491	0.228715	0.128796	0.0764821	0	0.017298	0.0538268	0.323391	32.5577	41.3079	58.2219	33.4148
841	0.174414	0.231474	0.125601	0.0764232	0	0.0174764	0.053408	0.321202	32.3113	41.6338	57.226	34.2525
842	0.177396	0.234194	0.122394	0.076336	0	0.0176518	0.0529711	0.319057	32.0619	41.9634	56.2059	35.1139
843	0.180393	0.236936	0.119205	0.076249	0	0.017813	0.0525409	0.316863	31.814	42.2929	55.1716	35.9874
844	0.183408	0.239563	0.116037	0.0761546	0	0.0180081	0.0521179	0.314712	31.5654	42.6238	54.1252	36.8752
845	0.1864	0.242304	0.112861	0.0760361	0	0.0181852	0.0516798	0.312533	31.3242	42.9616	53.0614	37.7739
846	0.189466	0.245024	0.109684	0.0758961	0	0.0183609	0.0512284	0.310339	31.0777	43.2992	51.9728	38.6969
847	0.192617	0.247741	0.106413	0.075748	0	0.0185523	0.0507779	0.30815	30.8286	43.654	50.8362	39.6628
848	0.195695	0.250481	0.103259	0.0755916	0	0.0187295	0.0503338	0.30591	30.5872	43.9965	49.7161	40.6127
849	0.198914	0.253176	0.0999928	0.0754147	0	0.0189193	0.0498714	0.303712	30.3376	44.356	48.537	41.6181
850	0.202068	0.255903	0.0967963	0.0752319	0	0.0191114	0.0494169	0.301473	30.0962	44.712	47.3625	42.6172
851	0.205296	0.258613	0.0935801	0.0750204	0	0.0193182	0.0489501	0.299222	29.8504	45.0713	46.1568	43.646
852	0.208526	0.261328	0.0903621	0.0748034	0	0.0195095	0.0484856	0.296986	29.6091	45.4367	44.9309	44.692
853	0.211825	0.26402	0.087143	0.074573	0	0.0196991	0.0480077	0.294732	29.3642	45.8018	43.6785	45.7641
854	0.215123	0.266713	0.0839209	0.0743191	0	0.0199046	0.0475316	0.292488	29.1229	46.1739	42.4051	46.8541
855	0.218508	0.269405	0.0807051	0.0740499	0	0.0201101	0.047057	0.290164	28.8759	46.5417	41.105	47.9704
856	0.221877	0.272081	0.077471	0.0737692	0	0.0203143	0.0465702	0.287918	28.6357	46.9218	39.7801	49.1079
857	0.225268	0.274785	0.0742514	0.0734727	0	0.0205207	0.0460792	0.285623	28.3963	47.3019	38.4358	50.2623
858	0.228726	0.277466	0.0710313	0.0731546	0	0.0207252	0.0455857	0.283311	28.1541	47.6817	37.0641	51.4437
859	0.232182	0.280146	0.0677973	0.0728295	0	0.0209455	0.0450935	0.281006	27.9163	48.0714	35.6658	52.6478
860	0.235709	0.282807	0.0645649	0.0724759	0	0.0211643	0.0445891	0.27869	27.6755	48.4599	34.2398	53.8793
861	0.239234	0.285469	0.0613391	0.0721158	0	0.0213832	0.0440757	0.276383	27.4387	48.8531	32.793	55.1289
862	0.242819	0.288237	0.0580932	0.0717244	0	0.0215996	0.043559	0.273967	27.2007	49.2493	31.3096	56.4089
863	0.246415	0.290883	0.0548569	0.0713218	0	0.0218172	0.0430462	0.27166	26.9658	49.6508	29.8064	57.7107
864	0.250097	0.29353	0.0516172	0.0709046	0	0.0220505	0.0425245	0.269276	26.7265	50.0495	28.2713	59.0436
865	0.253787	0.296188	0.0483754	0.070475	0	0.0222689	0.0419952	0.26691	26.4913	50.4542	26.71	60.3992
866	0.257474	0.298845	0.0451292	0.0700301	0	0.022503	0.0414672	0.264551	26.26	50.8672	25.1216	61.7783
867	0.26122	0.301608	0.0418742	0.0695543	0	0.0227345	0.0409256	0.262084	26.0278	51.2803	23.499	63.186
868	0.265037	0.304218	0.0386232	0.0690602	0	0.0229805	0.0403835	0.259698	25.7932	51.6933	21.8492	64.6258
869	0.268888	0.306868	0.0353636	0.0685604	0	0.0232138	0.0398376	0.257268	25.5607	52.1105	20.1666	66.0938
870	0.272763	0.309586	0.0320921	0.0680302	0	0.0234574	0.0392842	0.254787	25.3301	52.5336	18.4496	67.5907
871	0.276678	0.312216	0.0288316	0.0674876	0	0.0237047	0.0387279	0.252354	25.1002	52.957	16.7088	69.1134
872	0.280597	0.314853	0.0255576	0.0669317	0	0.0239524	0.0381739	0.249934	24.8745	53.3909	14.9327	70.6667
873	0.284545	0.317562	0.022284	0.0663391	0	0.0241952	0.037603	0.247471	24.6505	53.8264	13.1263	72.2454
874	0.288621	0.320184	0.0190002	0.0657419	0	0.0244572	0.0370288	0.244967	24.4206	54.2568	11.2815	73.8662
875	0.292658	0.322902	0.0157099	0.0651219	0	0.0247161	0.0364515	0.242441	24.1979	54.6995	9.40389	75.5106
876	0.296804	0.32551	0.0124166	0.0644841	0	0.0249768	0.0358681	0.23994	23.9716	55.1377	7.49208	77.1938
877	0.30097	0.328185	0.00911484	0.063818	0	0.0252477	0.035268	0.237397	23.7477	55.5814	5.5441	78.9073
878	0.305171	0.3309	0.00580669	0.0631371	0	0.025506	0.0346739	0.234805	23.5258	56.0285	3.56033	80.6522
879	0.309451	0.333474	0.00249137	0.0624323	0	0.0257793	0.0340701	0.232302	23.3028	56.4773	1.5398	82.4384
880	0.313112	0.335457	0	0.0616462	0	0.0259973	0.0335809	0.230207	23.1068	56.7523	0	83.8199
881	0.315102	0.335308	0	0.0606363	0	0.0259963	0.0334437	0.229514	22.9708	56.463	0	83.9226
882	0.317197	0.335042	0	0.0596215	0	0.0259967	0.0333083	0.228834	22.8297	56.1639	0	84.0333
883	0.319244	0.334816	0	0.0585972	0	0.0259847	0.033177	0.228181	22.6937	55.8743	0	84.1393
884	0.321347	0.334559	0	0.057559	0	0.0259858	0.0330424	0.227506	22.5554	55.5802	0	84.248
885	0.323414	0.334398	0	0.0565057	0	0.0259838	0.0328936	0.226805	22.421	55.2924	0	84.3505
886	0.325529	0.334153	0	0.0554446	0	0.0259858	0.0327498	0.226138	22.2851	55.0026	0	84.4572
887	0.327647	0.33391	0	0.0543755	0	0.025988	0.0326062	0.225473	22.1507	54.7154	0	84.5629
888	0.329855	0.333669	0	0.0532983	0	0.0259903	0.0324628	0.224724	22.0123	54.4186	0	84.671
889	0.332038	0.333403	0	0.0522086	0	0.0259907	0.0323168	0.224043	21.8772	54.1292	0	84.7781
890	0.334209	0.333261	0	0.0511006	0	0.0259902	0.0321698	0.223269	21.7443	53.8417	0	84.8792
891	0.336407	0.333009	0	0.04998	0	0.0259917	0.0320148	0.222598	21.6115	53.5563	0	84.9844
892	0.338687	0.332753	0	0.0488587	0	0.0259929	0.0318699	0.221838	21.4755	53.2629	0	85.0918
893	0.34098	0.332508	0	0.0477142	0	0.0259949	0.0317156	0.221086	21.3404	52.9709	0	85.1983
894	0.343331	0.332235	0	0.0465655	0	0.0259948	0.0315586	0.220315	21.2037	52.6752	0	85.3068
895	0.345637	0.332002	0	0.0453975	0	0.0259978	0.0313949	0.219571	21.0712	52.3879	0	85.4112
896	0.347999	0.33174	0	0.044217	0	0.0259985	0.0312388	0.218807	20.9372	52.0972	0	85.5177
897	0.350368	0.331484	0	0.043029	0	0.0259996	0.0310729	0.218047	20.8046	51.8087	0	85.6232
898	0.352799	0.331204	0	0.0418215	0	0.025999	0.0309048	0.217271	20.6703	51.5163	0	85.7306
899	0.355281	0.330837	0	0.0406116	0	0.0260021	0.0307411	0.216527	20.535	51.2227	0	85.8418
900	0.357752	0.330594	0	0.0393835	0	0.0260043	0.0305763	0.21569	20.4018	50.9313	0	85.9471
901	0.36026	0.330304	0	0.0381333	0	0.0259873	0.0304073	0.214908	20.2689	50.6398	0	86.0543
902	0.362747	0.330075	0	0.0368736	0	0.0259907	0.0302333	0.21408	20.1383	50.353	0	86.1576
903	0.365294	0.32982	0	0.0356024	0	0.0259919	0.030057	0.213235	20.0063	50.0629	0	86.2626
904	0.367951	0.329451	0	0.0343168	0	0.0259949	0.0298825	0.212404	19.8706	49.7656	0	86.3741
905	0.370565	0.329178	0	0.0330104	0	0.0259948	0.0297045	0.211547	19.7388	49.475	0	86.4799
906	0.373186	0.328912	0	0.0316964	0	0.0259952	0.0295166	0.210694	19.6084	49.187	0	86.5844
907	0.375865	0.328559	0	0.0303705	0	0.0259995	0.0293331	0.209873	19.477	48.8975	0	86.6926
908	0.378556	0.328278	0	0.0290135	0	0.0259987	0.0291438	0.20901	19.3466	48.6087	0	86.7978
909	0.381389	0.327907	0	0.0276523	0	0.0260015	0.0289587	0.208092	19.2114	48.3095	0	86.909
910	0.384094	0.327637	0	0.0262714	0	0.0260016	0.0287599	0.207237	19.0838	48.0261	0	87.012
911	0.38694	0.327277	0	0.0248775	0	0.0260054	0.0285756	0.206325	18.9515	47.7326	0	87.1209
912	0.389851	0.326897	0	0.0234652	0	0.0260075	0.0283791	0.2054	18.8182	47.4361	0	87.2313
913	0.392667	0.326646	0	0.0220356	0	0.0260091	0.0281715	0.204471	18.6908	47.1511	0	87.3335
914	0.395645	0.326248	0	0.0205887	0	0.0260099	0.0279734	0.203535	18.5581	46.8555	0	87.4439
915	0.398581	0.325888	0	0.0191273	0	0.0260136	0.027768	0.202622	18.429	46.5671	0	87.5508
916	0.401522	0.325596	0	0.0176453	0	0.026012	0.0275569	0.201668	18.3015	46.2807	0	87.6545
917	0.404612	0.325217	0	0.0161494	0	0.0260143	0.0273499	0.200658	18.1695	45.9846	0	87.7637
918	0.407681	0.324822	0	0.0146277	0	0.0260152	0.027131	0.199723	18.0403	45.6947	0	87.8719
919	0.410792	0.32446	0	0.0130906	0	0.0260189	0.0269149	0.198723	17.911	45.4038	0	87.9788
920	0.413963	0.324075	0	0.0115358	0	0.0260207	0.0266968	0.197709	17.7813	45.1113	0	88.0868
921	0.417145	0.323699	0	0.00996443	0	0.0260232	0.0264689	0.1967	17.6529	44.8215	0	88.1936
922	0.420333	0.323327	0	0.00836806	0	0.026026	0.0262519	0.195693	17.5261	44.5348	0	88.2993
923	0.423641	0.322913	0	0.00674975	0	0.0260255	0.0260103	0.194661	17.3966	44.2415	0	88.4081
924	0.426945	0.322562	0	0.00511349	0	0.0260145	0.0257844	0.193581	17.2691	43.9514	0	88.5135
925	0.43027	0.322159	0	0.00345624	0	0.0260149	0.0255438	0.192555	17.1427	43.6642	0	88.6198
926	0.433691	0.321764	0	0.00177744	0	0.0260158	0.0253037	0.191448	17.0145	43.3722	0	88.727
927	0.437181	0.321283	0	7.68661e-05	0	0.0260209	0.0250676	0.190371	16.8857	43.0793	0	88.8371
928	0.438246	0.320951	0	0	0	0.026027	0.0248744	0.189902	16.8469	42.9916	0	88.8721
929	0.43919	0.320595	0	0	0	0.0260313	0.0246792	0.189504	16.8128	42.9147	0	88.9043
930	0.44014	0.320243	0	0	0	0.0260358	0.0244738	0.189108	16.7787	42.8376	0	88.9365
931	0.441134	0.319859	0	0	0	0.0260377	0.0242763	0.188693	16.7431	42.7574	0	88.9704
932	0.442084	0.319506	0	0	0	0.0260422	0.0240708	0.188297	16.7092	42.6808	0	89.0023
933	0.443068	0.319178	0	0	0	0.0260486	0.0238774	0.187829	16.6742	42.6012	0	89.0341
934	0.444067	0.318797	0	0	0	0.0260509	0.0236696	0.187415	16.6388	42.5214	0	89.0678
935	0.445019	0.318444	0	0	0	0.0260554	0.0234638	0.187019	16.6053	42.4456	0	89.0994
936	0.446061	0.318093	0	0	0	0.0260601	0.0232477	0.186538	16.5687	42.3622	0	89.1327
937	0.447074	0.317647	0	0	0	0.0260681	0.0230449	0.186166	16.5333	42.2831	0	89.1683
938	0.448079	0.317269	0	0	0	0.0260706	0.0228266	0.185754	16.4984	42.2039	0	89.2014
939	0.449123	0.316918	0	0	0	0.0260754	0.0226102	0.185273	16.4622	42.1214	0	89.2345
940	0.45019	0.316447	0	0	0	0.0260814	0.0223949	0.184886	16.4255	42.039	0	89.2715
941	0.45124	0.3161	0	0	0	0.0260864	0.022168	0.184406	16.3894	41.9566	0	89.3043
942	0.452308	0.315628	0	0	0	0.0260925	0.0219525	0.184019	16.353	41.8748	0	89.3411
943	0.453358	0.31528	0	0	0	0.0260975	0.0217255	0.183539	16.3172	41.793	0	89.3737
944	0.45448	0.314784	0	0	0	0.0261015	0.0214976	0.183137	16.2793	41.7078	0	89.412
945	0.455536	0.314439	0	0	0	0.0261068	0.0212601	0.182658	16.2436	41.6261	0	89.4444
946	0.456658	0.313942	0	0	0	0.0261109	0.021032	0.182257	16.206	41.5415	0	89.4825
947	0.457778	0.313503	0	0	0	0.0261198	0.0207972	0.181802	16.1686	41.4567	0	89.5186
948	0.458882	0.31313	0	0	0	0.0261228	0.0205577	0.181307	16.1318	41.3725	0	89.5524
949	0.460011	0.312637	0	0	0	0.0261271	0.020319	0.180907	16.0946	41.2884	0	89.5901
950	0.461191	0.312178	0	0	0	0.0261188	0.0200721	0.18044	16.0559	41.2	0	89.6276
951	0.462365	0.311714	0	0	0	0.0261256	0.0198247	0.179971	16.0174	41.1125	0	89.665
952	0.463539	0.311249	0	0	0	0.0261325	0.0195771	0.179502	15.9791	41.0254	0	89.7023
953	0.464674	0.310758	0	0	0	0.0261371	0.0193278	0.179102	15.9423	40.9421	0	89.7394
954	0.465855	0.310297	0	0	0	0.0261442	0.0190697	0.178634	15.9041	40.8552	0	89.7764
955	0.467078	0.309805	0	0	0	0.0261488	0.0188201	0.178148	15.8648	40.7657	0	89.815
956	0.46826	0.309343	0	0	0	0.0261559	0.0185617	0.17768	15.827	40.6795	0	89.8517
957	0.469494	0.308857	0	0	0	0.0261611	0.0182913	0.177197	15.7877	40.5899	0	89.89
958	0.470723	0.308367	0	0	0	0.0261659	0.0180311	0.176713	15.7488	40.501	0	89.9281
959	0.472022	0.307786	0	0	0	0.0261746	0.0177628	0.176254	15.7079	40.4084	0	89.9701
960	0.473263	0.307303	0	0	0	0.02618	0.0174816	0.175773	15.669	40.3194	0	90.0079
961	0.474499	0.306816	0	0	0	0.0261852	0.0172107	0.175289	15.6304	40.2312	0	90.0456
962	0.475805	0.306237	0	0	0	0.0261942	0.0169316	0.174831	15.5898	40.1392	0	90.0871
963	0.477048	0.305753	0	0	0	0.0261996	0.01665	0.17435	15.5515	40.0513	0	90.1245
964	0.478402	0.305147	0	0	0	0.0262063	0.0163692	0.173876	15.5099	39.9569	0	90.1673
965	0.47965	0.304666	0	0	0	0.026212	0.016077	0.173395	15.4717	39.8693	0	90.2044
966	0.481052	0.304088	0	0	0	0.0262212	0.0157868	0.172852	15.4291	39.7718	0	90.2468
967	0.482414	0.303484	0	0	0	0.0262282	0.015495	0.172379	15.388	39.6782	0	90.2891
968	0.483781	0.302883	0	0	0	0.0262355	0.0151927	0.171908	15.3469	39.5845	0	90.3313
969	0.485124	0.302403	0	0	0	0.0262415	0.0148895	0.171341	15.3066	39.4915	0	90.3693
970	0.486493	0.301802	0	0	0	0.0262487	0.0145869	0.17087	15.2659	39.3986	0	90.4111
971	0.487867	0.301203	0	0	0	0.0262563	0.0142736	0.1704	15.2252	39.3057	0	90.4527
972	0.48933	0.300603	0	0	0	0.0262638	0.0139602	0.169843	15.1822	39.2068	0	90.4957
973	0.490706	0.300004	0	0	0	0.0262714	0.0136466	0.169372	15.1419	39.1147	0	90.5369
974	0.492244	0.29931	0	0	0	0.0262828	0.0133242	0.168839	15.0972	39.0126	0	90.5835
975	0.493672	0.298687	0	0	0	0.0262883	0.0129986	0.168355	15.0559	38.918	0	90.6259
976	0.495143	0.298089	0	0	0	0.0262962	0.012674	0.167798	15.0135	38.8204	0	90.6681
977	0.496578	0.297468	0	0	0	0.026302	0.0123376	0.167315	14.9725	38.7262	0	90.7102
978	0.498124	0.296775	0	0	0	0.0263137	0.0120038	0.166783	14.9285	38.6254	0	90.7559
979	0.499653	0.296156	0	0	0	0.0263198	0.0116565	0.166214	14.8852	38.5255	0	90.7991
980	0.501159	0.295437	0	0	0	0.0263292	0.0113212	0.165753	14.8429	38.429	0	90.8445
981	0.502764	0.294724	0	0	0	0.0263392	0.0109646	0.165208	14.798	38.3259	0	90.8911
982	0.504298	0.294105	0	0	0	0.0263454	0.0106126	0.164639	14.7554	38.2273	0	90.9336
983	0.505906	0.293391	0	0	0	0.0263554	0.0102534	0.164094	14.711	38.1251	0	90.9798
984	0.507518	0.292678	0	0	0	0.0263656	0.00989075	0.163549	14.6667	38.0233	0	91.0258
985	0.509133	0.291965	0	0	0	0.0263759	0.00952259	0.163004	14.6226	37.9217	0	91.0716
986	0.510795	0.291227	0	0	0	0.0263839	0.00914912	0.162445	14.5775	37.8178	0	91.1186
987	0.512417	0.290516	0	0	0	0.0263944	0.00877198	0.161901	14.5338	37.7169	0	91.1639
988	0.514086	0.28978	0	0	0	0.0264028	0.00838852	0.161343	14.4891	37.6136	0	91.2105
989	0.515758	0.289045	0	0	0	0.0264112	0.00800059	0.160785	14.4445	37.5107	0	91.2568
990	0.517434	0.288311	0	0	0	0.0264198	0.00760713	0.160228	14.4002	37.4081	0	91.3028
991	0.519228	0.287454	0	0	0	0.0264299	0.00720849	0.159679	14.353	37.2996	0	91.3539
992	0.520912	0.286722	0	0	0	0.0264387	0.00680497	0.159122	14.309	37.1976	0	91.3995
993	0.522714	0.285867	0	0	0	0.026449	0.00639621	0.158574	14.2623	37.0899	0	91.45
994	0.524494	0.285136	0	0	0	0.0264582	0.00598046	0.157931	14.2163	36.9828	0	91.4965
995	0.526304	0.284283	0	0	0	0.0264688	0.00556046	0.157384	14.17	36.8757	0	91.5465
996	0.528165	0.283455	0	0	0	0.0264819	0.00513527	0.156763	14.1226	36.7658	0	91.5963
997	0.529984	0.282603	0	0	0	0.0264928	0.00470287	0.156217	14.0766	36.6594	0	91.6458
998	0.531897	0.281752	0	0	0	0.0265038	0.00426478	0.155583	14.0285	36.5478	0	91.6963
999	0.533725	0.280902	0	0	0	0.0265151	0.00381996	0.155038	13.9829	36.442	0	91.7454
1000	0.535647	0.280052	0	0	0	0.0265265	0.00336942	0.154405	13.9352	36.3311	0	91.7954

## Sheet: Melt-extracted at 0.9 GPa
Temperature (°C)	Model fraction of minerals (wt%)								CW in melt (ppm)	CSn in melt (ppm)	Model fraction of Sn in Bi (wt%)	Model fraction of Sn in melt (wt%)
	Melt	G	Bi	Ksp	Pl	Ilm	Sill	Q
752	3.43668e-05	0	0.38079	0.0343356	0.0246366	0.008263	0.0747191	0.477221	49.439	23.5423	98.1644	0.00381873
753	8.6366e-05	0	0.380787	0.0343716	0.0245981	0.00823402	0.0747989	0.477124	49.4264	23.5417	98.161	0.00959647
754	0.000138714	0	0.380745	0.0344041	0.0245667	0.00820419	0.0748709	0.47707	49.4189	23.5434	98.157	0.0154141
755	0.000191445	0	0.380679	0.034435	0.024531	0.00817616	0.0749593	0.477028	49.414	23.5465	98.1531	0.0212765
756	0.000244543	0	0.380676	0.034471	0.0244925	0.00814717	0.075039	0.47693	49.4011	23.5458	98.1496	0.0271769
757	0.000298022	0	0.380673	0.034507	0.0244541	0.00811818	0.0751187	0.476831	49.3882	23.5452	98.1461	0.0331193
758	0.000351882	0	0.380669	0.0345429	0.0244156	0.00808919	0.0751984	0.476733	49.3751	23.5446	98.1425	0.0391038
759	0.000406171	0	0.380603	0.0345738	0.0243799	0.00806113	0.0752867	0.476689	49.3698	23.5477	98.1384	0.0451428
760	0.00182594	0.00332796	0.379377	0.0362025	0.0235767	0.00819479	0.0756339	0.471862	49.0231	23.5806	97.959	0.203223
761	0.00446357	0.00960984	0.371885	0.0387529	0.0217768	0.00836767	0.0751903	0.469954	49.0432	23.9707	97.613	0.505003
762	0.00703719	0.0156975	0.364672	0.0411841	0.020049	0.00853594	0.0747518	0.468072	49.0512	24.3574	97.2641	0.809023
763	0.00963902	0.0218271	0.360944	0.0439319	0.0185779	0.00878115	0.0750405	0.461259	48.6086	24.5194	96.9097	1.11551
764	0.0121245	0.0276143	0.354044	0.0461827	0.0169686	0.00894292	0.0746275	0.459496	48.6092	24.9052	96.5528	1.42523
765	0.0145447	0.0332566	0.347331	0.0483302	0.01543	0.00909914	0.0742239	0.457784	48.6091	25.2918	96.1926	1.73627
766	0.0169272	0.0387372	0.340863	0.0503874	0.0139496	0.00925208	0.0738198	0.456064	48.5928	25.674	95.8279	2.05121
767	0.0194287	0.0444805	0.337642	0.0528493	0.0126473	0.00949042	0.0741209	0.449341	48.1325	25.8194	95.4599	2.36767
768	0.0217359	0.0497193	0.331377	0.0547618	0.0112719	0.0096393	0.0737444	0.44775	48.1177	26.2045	95.0863	2.68835
769	0.0240008	0.0548231	0.325293	0.0565854	0.0099356	0.009783	0.0733662	0.446213	48.0961	26.5889	94.7096	3.01201
770	0.0262133	0.0597914	0.319367	0.0583359	0.00865973	0.00992608	0.0730045	0.444702	48.0727	26.9736	94.3295	3.33726
771	0.0284025	0.0646406	0.313597	0.0600143	0.00742754	0.0100652	0.0726365	0.443217	48.0395	27.3575	93.9436	3.66744
772	0.0308248	0.0700034	0.310846	0.0621949	0.00629747	0.010297	0.0729575	0.436579	47.5623	27.4857	93.5558	3.99888
773	0.0329623	0.0746668	0.305242	0.0637586	0.00514152	0.0104319	0.0726114	0.435186	47.5278	27.872	93.1601	4.33626
774	0.0350599	0.079217	0.299794	0.0652534	0.00402606	0.0105648	0.0722602	0.433825	47.4882	28.257	92.7613	4.67592
775	0.0371256	0.083666	0.294484	0.0666856	0.00294849	0.0106952	0.0719225	0.432473	47.4432	28.6415	92.3584	5.0188
776	0.0395231	0.0888163	0.291995	0.0686959	0.00192616	0.0109235	0.0722508	0.425869	46.9574	28.7585	91.9518	5.36473
777	0.0415542	0.0930907	0.286912	0.0700258	0.000912236	0.0110502	0.0719031	0.424552	46.8996	29.1371	91.5405	5.71467
778	0.0432477	0.0965806	0.280525	0.0708505	0	0.0111107	0.0712034	0.426482	47.1039	29.6689	91.1362	6.05612
779	0.0441972	0.0982326	0.278738	0.0711536	0	0.0111586	0.0710586	0.425461	47.0137	29.7898	90.9247	6.21431
780	0.0451668	0.0999026	0.276863	0.0714689	0	0.0112071	0.0709287	0.424463	46.928	29.9193	90.7058	6.37824
781	0.0461533	0.101598	0.274984	0.0717737	0	0.0112585	0.0707752	0.423457	46.8376	30.0495	90.4821	6.5459
782	0.0471546	0.1033	0.27309	0.0720914	0	0.0113092	0.0706285	0.422426	46.7451	30.1816	90.2539	6.71732
783	0.048164	0.105015	0.271196	0.0723995	0	0.0113615	0.0704705	0.421393	46.6503	30.3144	90.0224	6.8913
784	0.0492069	0.106771	0.269237	0.0727172	0	0.0114186	0.0703221	0.420327	46.5529	30.4532	89.7814	7.07276
785	0.0502469	0.108516	0.267322	0.0730268	0	0.011473	0.0701579	0.419258	46.4521	30.589	89.5403	7.25445
786	0.0513117	0.110303	0.265345	0.0733467	0	0.0115306	0.070004	0.418159	46.351	30.731	89.2907	7.44259
787	0.0523929	0.112101	0.263363	0.0736646	0	0.0115896	0.0698374	0.417052	46.2461	30.874	89.0361	7.63478
788	0.0534949	0.113918	0.261296	0.0739954	0	0.0116509	0.0696752	0.41597	46.1449	31.0262	88.7728	7.8338
789	0.0545987	0.115734	0.259302	0.0743083	0	0.0117124	0.0695048	0.41484	46.0356	31.1721	88.5096	8.03303
790	0.0557231	0.117584	0.257222	0.0746338	0	0.0117761	0.0693274	0.413734	45.93	31.3274	88.2369	8.23929
791	0.0568637	0.11943	0.255138	0.0749487	0	0.0118396	0.0691598	0.412621	45.8209	31.4839	87.9594	8.44995
792	0.0580242	0.121308	0.253067	0.0752752	0	0.0119067	0.0689842	0.411435	45.7048	31.6393	87.6762	8.66498
793	0.0591948	0.123183	0.250967	0.075592	0	0.011974	0.0688001	0.41029	45.5898	31.7992	87.3877	8.88444
794	0.060385	0.125104	0.248879	0.0759115	0	0.0120416	0.0686079	0.409071	45.4683	31.9579	87.0933	9.10831
795	0.0615974	0.127033	0.24671	0.0762368	0	0.0121135	0.0684214	0.407887	45.3496	32.1262	86.789	9.3401
796	0.0628328	0.128982	0.244529	0.0765573	0	0.0121862	0.0682311	0.406681	45.2264	32.2963	86.4774	9.57789
797	0.0640821	0.130951	0.242339	0.0768737	0	0.0122615	0.0680376	0.405455	45.1008	32.4686	86.1598	9.82044
798	0.0653466	0.132928	0.240143	0.077196	0	0.0123364	0.0678312	0.404218	44.9724	32.6424	85.8363	10.0678
799	0.0666309	0.134938	0.237857	0.0775214	0	0.0124133	0.0676389	0.403	44.8484	32.8275	85.5013	10.3239
800	0.0679466	0.13697	0.235592	0.0778435	0	0.0124944	0.0674299	0.401724	44.7142	33.0103	85.1588	10.5864
801	0.0692685	0.139006	0.233292	0.0781616	0	0.012575	0.0672214	0.400475	44.5828	33.1991	84.8097	10.8541
802	0.0706204	0.141063	0.231009	0.0784839	0	0.012658	0.067006	0.39916	44.4423	33.3863	84.4531	11.1283
803	0.0719931	0.143153	0.228637	0.0788101	0	0.0127431	0.0667944	0.397869	44.3058	33.5851	84.0837	11.4122
804	0.073384	0.145215	0.226272	0.0791284	0	0.0128316	0.0665841	0.396585	44.1649	33.7847	83.7085	11.7018
805	0.0747941	0.147419	0.223888	0.0794478	0	0.0129189	0.0663569	0.395175	44.0207	33.9867	83.3219	11.9979
806	0.0762225	0.14948	0.221512	0.0797684	0	0.0130096	0.0661422	0.393865	43.8731	34.1905	82.9319	12.3004
807	0.0776565	0.15166	0.219107	0.0800684	0	0.0130999	0.0659074	0.392501	43.7269	34.3991	82.5319	12.6083
808	0.0791404	0.153741	0.21667	0.0804015	0	0.0131958	0.0656821	0.391169	43.5729	34.6124	82.1203	12.9289
809	0.080629	0.15594	0.214203	0.0807132	0	0.0132912	0.0654469	0.389778	43.4208	34.8312	81.6982	13.2553
810	0.0821409	0.158131	0.211731	0.0810221	0	0.0133893	0.0652099	0.388376	43.2643	35.052	81.2674	13.5895
811	0.0836558	0.160436	0.209229	0.0813173	0	0.0134868	0.0649627	0.386913	43.1102	35.2786	80.826	13.9296
812	0.0852073	0.162617	0.206758	0.0816144	0	0.0135859	0.0647136	0.385505	42.9464	35.5029	80.3791	14.2781
813	0.0867804	0.164805	0.2042	0.0819247	0	0.0136906	0.0644795	0.38412	42.7863	35.7407	79.9166	14.6391
814	0.0883664	0.167126	0.201637	0.0822226	0	0.0137947	0.0642212	0.382632	42.6238	35.9803	79.4426	15.0066
815	0.0899707	0.169288	0.199163	0.0825048	0	0.0138991	0.063969	0.381205	42.4512	36.211	78.971	15.377
816	0.0915866	0.171616	0.196518	0.0828078	0	0.0140087	0.0637158	0.379747	42.2913	36.467	78.4731	15.7638
817	0.0932582	0.173912	0.193945	0.0830878	0	0.0141175	0.0634521	0.378227	42.1135	36.7128	77.9678	16.1598
818	0.0949282	0.176205	0.191378	0.0833594	0	0.0142279	0.0631893	0.376712	41.9369	36.9614	77.4565	16.5605
819	0.0966057	0.178514	0.188731	0.0836477	0	0.0143411	0.0629223	0.375238	41.7669	37.2246	76.9293	16.9732
820	0.0982827	0.180823	0.186091	0.0839198	0	0.0144561	0.0626566	0.373771	41.5976	37.4907	76.3953	17.3913
821	0.100038	0.18311	0.183535	0.0841826	0	0.0145727	0.0623846	0.372176	41.4047	37.7424	75.8521	17.8208
822	0.101803	0.185415	0.180801	0.0844545	0	0.0146923	0.0621199	0.370715	41.2269	38.0249	75.2814	18.2709
823	0.103543	0.187816	0.178131	0.0846985	0	0.0148085	0.0618307	0.369172	41.0501	38.3021	74.7103	18.7185
824	0.105303	0.190116	0.175505	0.0849615	0	0.0149312	0.061556	0.367627	40.8665	38.5757	74.135	19.1729
825	0.107129	0.19251	0.172843	0.0851962	0	0.0150535	0.0612678	0.366	40.6731	38.8537	73.5367	19.6457
826	0.10898	0.194811	0.170129	0.0854443	0	0.0151796	0.060985	0.364471	40.481	39.1437	72.9222	20.1344
827	0.110814	0.197224	0.167395	0.085672	0	0.0153052	0.0606944	0.362895	40.295	39.4413	72.2959	20.6289
828	0.112634	0.199613	0.164749	0.0858905	0	0.0154322	0.0603978	0.361284	40.1064	39.7298	71.6733	21.1211
829	0.114481	0.20191	0.162047	0.0861137	0	0.0155646	0.0601172	0.359767	39.9189	40.0313	71.033	21.6303
830	0.116391	0.204301	0.159315	0.0863097	0	0.0156936	0.0598134	0.358176	39.7221	40.337	70.3684	22.1592
831	0.118309	0.206707	0.156599	0.0865127	0	0.0158285	0.0595149	0.356529	39.5238	40.6434	69.6944	22.6955
832	0.120306	0.209093	0.153774	0.0867086	0	0.015962	0.0592122	0.354944	39.3208	40.9687	68.985	23.2632
833	0.122219	0.211493	0.151067	0.0869115	0	0.0161031	0.0589039	0.353302	39.1263	41.2838	68.2916	23.815
834	0.124199	0.213854	0.148337	0.0870991	0	0.0162347	0.0585859	0.351691	38.9234	41.6033	67.5763	24.3881
835	0.1262	0.216251	0.145538	0.0873029	0	0.0163693	0.0582795	0.350059	38.7234	41.9386	66.8358	24.9806
836	0.128194	0.218639	0.142839	0.0874182	0	0.0165192	0.0579716	0.348419	38.5179	42.2609	66.1005	25.5704
837	0.130191	0.221033	0.140049	0.0876224	0	0.0166536	0.0576557	0.346795	38.3221	42.6056	65.3379	26.1806
838	0.132244	0.223509	0.137228	0.0878048	0	0.0167997	0.0573261	0.345088	38.1188	42.9562	64.5489	26.8122
839	0.134309	0.22587	0.13453	0.0879126	0	0.0169477	0.0570041	0.343427	37.9066	43.2886	63.7689	27.4417
840	0.136386	0.228249	0.131748	0.088029	0	0.0170972	0.0566883	0.341803	37.7008	43.6421	62.9603	28.0935
841	0.138461	0.230629	0.128971	0.0881463	0	0.0172467	0.0563627	0.340184	37.4969	44.0005	62.1394	28.7552
842	0.140604	0.233112	0.126179	0.0882509	0	0.0173936	0.0560295	0.338431	37.2837	44.3601	61.2913	29.4388
843	0.142752	0.235467	0.123399	0.0883608	0	0.0175413	0.0556896	0.33679	37.0717	44.7246	60.4335	30.1342
844	0.144907	0.237833	0.120631	0.0884761	0	0.0177058	0.0553643	0.335083	36.8591	45.0918	59.5628	30.8402
845	0.147044	0.240311	0.117754	0.0885822	0	0.0178525	0.055023	0.333433	36.66	45.4895	58.6552	31.5709
846	0.14927	0.242651	0.114984	0.0886901	0	0.0180152	0.0546835	0.331705	36.44	45.8631	57.7458	32.3123
847	0.151487	0.245117	0.112213	0.0887092	0	0.0181769	0.0543313	0.329965	36.2237	46.2425	56.8201	33.0634
848	0.153697	0.247434	0.109443	0.0888105	0	0.0183219	0.0539889	0.328306	36.0131	46.6309	55.8828	33.8274
849	0.155924	0.24992	0.106592	0.0888392	0	0.0184852	0.0536329	0.326607	35.8051	47.0408	54.9057	34.6193
850	0.158226	0.252245	0.103836	0.088861	0	0.0186627	0.0532841	0.324885	35.5809	47.4297	53.9284	35.4208
851	0.160535	0.254721	0.100992	0.0888886	0	0.0188253	0.0529391	0.323099	35.3643	47.8437	52.9089	36.2514
852	0.162843	0.257059	0.0982016	0.0889171	0	0.018988	0.0525845	0.321407	35.1478	48.2538	51.8882	37.0878
853	0.165124	0.259495	0.0953913	0.0889328	0	0.0191635	0.0522228	0.31967	34.938	48.6774	50.8457	37.9375
854	0.167506	0.261812	0.0925834	0.0889561	0	0.0193245	0.0518554	0.317963	34.7165	49.0988	49.7763	38.8178
855	0.169874	0.264248	0.0897644	0.0889743	0	0.0195001	0.0514856	0.316154	34.4989	49.5297	48.6842	39.7121
856	0.172238	0.26668	0.0869493	0.0889079	0	0.0196753	0.0511162	0.314433	34.2845	49.9683	47.575	40.6213
857	0.174711	0.269007	0.0841499	0.0888537	0	0.019853	0.0507543	0.312671	34.0557	50.3992	46.4404	41.56
858	0.177073	0.271439	0.0813348	0.0888737	0	0.0200282	0.0503765	0.310875	33.8471	50.8532	45.2911	42.5011
859	0.179545	0.273768	0.0785252	0.0888223	0	0.020206	0.0500063	0.309127	33.6248	51.3026	44.1131	43.4755
860	0.18206	0.276165	0.0757005	0.0887494	0	0.0203945	0.0496246	0.307306	33.3992	51.7578	42.9036	44.4755
861	0.184502	0.278591	0.0728789	0.0886868	0	0.0205692	0.0492491	0.305522	33.1874	52.2289	41.6803	45.4824
862	0.187054	0.280911	0.0700703	0.0885516	0	0.0207621	0.0488698	0.303781	32.9616	52.6931	40.4303	46.5213
863	0.189563	0.283307	0.0672408	0.0884817	0	0.0209504	0.0484807	0.301977	32.7459	53.1758	39.153	47.5771
864	0.192159	0.285703	0.0644069	0.0883295	0	0.0211387	0.0480823	0.300181	32.5212	53.6574	37.8426	48.6655
865	0.194681	0.288121	0.0615831	0.0882694	0	0.0213286	0.0476888	0.298328	32.309	54.1537	36.5181	49.7602
866	0.197298	0.290416	0.0587566	0.0881306	0	0.0215195	0.0472986	0.296581	32.0873	54.6502	35.1615	50.8916
867	0.199972	0.292802	0.0559157	0.0879792	0	0.0217227	0.046902	0.294707	31.861	55.1505	33.7677	52.0534
868	0.202577	0.295218	0.0530852	0.0878381	0	0.0219125	0.0465008	0.292869	31.6468	55.6658	32.3579	53.224
869	0.205229	0.297578	0.0502395	0.0876813	0	0.0221136	0.0460918	0.291067	31.4299	56.1904	30.9119	54.4291
870	0.207986	0.299964	0.0473937	0.0874502	0	0.0223167	0.0456776	0.289212	31.2023	56.7091	29.4301	55.6695
871	0.21065	0.302345	0.0445517	0.0873024	0	0.0225194	0.0452743	0.287358	30.9896	57.25	27.9292	56.9202
872	0.213451	0.304662	0.0417145	0.0870931	0	0.0227274	0.0448616	0.285491	30.7626	57.7801	26.3927	58.2112
873	0.216197	0.307039	0.038861	0.0868632	0	0.0229454	0.0444493	0.283644	30.5456	58.3334	24.8228	59.5249
874	0.219013	0.309393	0.0359995	0.0866279	0	0.0231615	0.044024	0.281781	30.324	58.8899	23.2143	60.8754
875	0.221847	0.311774	0.0331459	0.0864016	0	0.023364	0.0436039	0.279864	30.1035	59.4502	21.5775	62.2497
876	0.224661	0.314129	0.0302745	0.0861695	0	0.0235802	0.0431707	0.278015	29.8889	60.0324	19.9013	63.6567
877	0.227577	0.316507	0.0274097	0.0858617	0	0.0237979	0.0427416	0.276105	29.6651	60.6059	18.1902	65.0988
878	0.230436	0.318946	0.0245336	0.085618	0	0.0240256	0.0423036	0.274137	29.4508	61.2025	16.4418	66.5657
879	0.233351	0.321326	0.0216584	0.0853136	0	0.0242434	0.0418666	0.272241	29.2342	61.8031	14.6573	68.069
880	0.236329	0.323677	0.018766	0.0850025	0	0.0244745	0.0414266	0.270325	29.0141	62.4122	12.8251	69.6172
881	0.239323	0.326051	0.0158791	0.084699	0	0.0247073	0.0409909	0.268349	28.795	63.0272	10.959	71.1939
882	0.242364	0.328373	0.0129843	0.0843831	0	0.0249361	0.040539	0.266421	28.5751	63.6509	9.04985	72.812
883	0.24539	0.330813	0.010084	0.0840643	0	0.0251634	0.0400862	0.264399	28.3598	64.2885	7.09878	74.4595
884	0.248445	0.333159	0.00717982	0.0836748	0	0.0254094	0.0396291	0.262503	28.1446	64.9389	5.10548	76.1492
885	0.251521	0.335535	0.00426754	0.083294	0	0.0256575	0.0391765	0.260549	27.9306	65.6011	3.06554	77.8781
886	0.255494	0.339072	0	0.0831148	0	0.0260146	0.0385356	0.257769	27.676	66.7021	0	80.4361
887	0.256894	0.338947	0	0.0823413	0	0.0260154	0.0384532	0.257349	27.5377	66.4219	0	80.5372
888	0.258352	0.338783	0	0.0815751	0	0.0260132	0.0383768	0.2569	27.3953	66.1334	0	80.6424
889	0.259876	0.33857	0	0.0808213	0	0.0260021	0.0382998	0.256431	27.2486	65.8354	0	80.7527
890	0.261341	0.338415	0	0.0800407	0	0.0260006	0.038214	0.255989	27.1085	65.5504	0	80.8563
891	0.262828	0.338288	0	0.0792586	0	0.0260013	0.0381418	0.255483	26.9676	65.2625	0	80.9591
892	0.264319	0.338167	0	0.0784696	0	0.0260024	0.0380599	0.254981	26.8277	64.976	0	81.0611
893	0.265825	0.337928	0	0.0776845	0	0.0260049	0.0379799	0.254578	26.6883	64.6933	0	81.168
894	0.267383	0.337781	0	0.076881	0	0.026004	0.037895	0.254056	26.5453	64.3998	0	81.2733
895	0.268945	0.337639	0	0.0760624	0	0.0260035	0.0378107	0.253539	26.4034	64.108	0	81.3779
896	0.270547	0.337412	0	0.0752547	0	0.0260068	0.0377215	0.253059	26.2596	63.8141	0	81.4872
897	0.272088	0.337244	0	0.074422	0	0.0260044	0.0376343	0.252607	26.1228	63.5326	0	81.5899
898	0.273692	0.337018	0	0.073598	0	0.0260078	0.0375558	0.252128	25.9819	63.2436	0	81.6975
899	0.275264	0.336888	0	0.0727571	0	0.0260083	0.0374624	0.25162	25.845	62.9602	0	81.7986
900	0.276896	0.336726	0	0.0719092	0	0.0260062	0.0373758	0.251087	25.7046	62.6693	0	81.9035
901	0.278573	0.336483	0	0.0710564	0	0.0260083	0.0372848	0.250595	25.562	62.3754	0	82.0131
902	0.280239	0.336361	0	0.0701922	0	0.0260094	0.0371922	0.250006	25.4216	62.0826	0	82.1163
903	0.281922	0.336123	0	0.0693238	0	0.0260119	0.0371018	0.249518	25.2816	61.7932	0	82.2242
904	0.28357	0.33598	0	0.068447	0	0.0259959	0.037007	0.249	25.1463	61.5097	0	82.3256
905	0.28532	0.335718	0	0.0675571	0	0.0259966	0.0369139	0.248494	25.004	61.2146	0	82.4362
906	0.287058	0.335578	0	0.0666561	0	0.0259962	0.0368194	0.247892	24.864	60.9209	0	82.5403
907	0.28881	0.33532	0	0.0657584	0	0.0259972	0.0367266	0.247388	24.7246	60.6309	0	82.649
908	0.290595	0.335098	0	0.0648514	0	0.026001	0.0366276	0.246826	24.5841	60.3371	0	82.7567
909	0.292316	0.334938	0	0.0639216	0	0.0259991	0.0365308	0.246295	24.4501	60.0555	0	82.8582
910	0.294168	0.334693	0	0.0629933	0	0.0260011	0.0364291	0.245716	24.3077	59.7567	0	82.9684
911	0.295933	0.334448	0	0.0620565	0	0.0260031	0.0363378	0.245222	24.1734	59.4755	0	83.0734
912	0.29775	0.334299	0	0.0611041	0	0.0260021	0.0362318	0.244613	24.0366	59.1858	0	83.1763
913	0.29961	0.334062	0	0.0601522	0	0.0260048	0.036131	0.24404	23.8982	58.8942	0	83.2837
914	0.301534	0.333799	0	0.0591871	0	0.0260054	0.0360273	0.243447	23.7569	58.5961	0	83.3941
915	0.303361	0.333661	0	0.0582037	0	0.0260052	0.0359224	0.242847	23.6239	58.3131	0	83.4944
916	0.305293	0.333406	0	0.0572152	0	0.0260064	0.0358196	0.24226	23.4852	58.0195	0	83.6029
917	0.307228	0.333155	0	0.0562272	0	0.026008	0.0357068	0.241676	23.3479	57.7282	0	83.7104
918	0.309165	0.332905	0	0.0552229	0	0.0260097	0.0356045	0.241093	23.212	57.4396	0	83.8171
919	0.311171	0.332636	0	0.0541987	0	0.0260098	0.0354897	0.240495	23.073	57.144	0	83.9266
920	0.313143	0.332424	0	0.0531837	0	0.0260144	0.0353809	0.239854	22.9376	56.8548	0	84.0313
921	0.315152	0.332156	0	0.0521431	0	0.0260147	0.0352768	0.239258	22.8018	56.5648	0	84.1388
922	0.317187	0.331962	0	0.0510845	0	0.0259946	0.0351555	0.238616	22.666	56.272	0	84.2439
923	0.319231	0.331732	0	0.0500332	0	0.0259978	0.0350448	0.237962	22.5308	55.9818	0	84.3494
924	0.321343	0.331482	0	0.0489621	0	0.0259995	0.0349215	0.237292	22.3928	55.6852	0	84.4576
925	0.323427	0.331203	0	0.0478784	0	0.0259989	0.0348056	0.236688	22.2584	55.3967	0	84.5648
926	0.325541	0.330955	0	0.0467909	0	0.0260007	0.034693	0.23602	22.1236	55.106	0	84.671
927	0.327709	0.330625	0	0.0456941	0	0.0260067	0.0345755	0.23539	21.9871	54.8128	0	84.7814
928	0.329894	0.330359	0	0.044579	0	0.0260072	0.0344506	0.23471	21.8511	54.5188	0	84.889
929	0.332082	0.330096	0	0.0434559	0	0.0260078	0.0343259	0.234031	21.7167	54.2276	0	84.9956
930	0.334276	0.329839	0	0.042317	0	0.0260089	0.0342018	0.233357	21.5835	53.9387	0	85.1013
931	0.336531	0.329556	0	0.0411664	0	0.026008	0.034075	0.232664	21.4485	53.6452	0	85.2092
932	0.338733	0.329307	0	0.0400035	0	0.0260097	0.0339518	0.231995	21.3181	53.3613	0	85.3128
933	0.341046	0.328944	0	0.0388349	0	0.0260132	0.0338203	0.231341	21.183	53.0683	0	85.4237
934	0.343402	0.328674	0	0.0376444	0	0.0260133	0.0336949	0.230572	21.047	52.7709	0	85.5317
935	0.345677	0.328411	0	0.0364464	0	0.0260139	0.0335596	0.229893	20.9173	52.4871	0	85.6355
936	0.348092	0.328061	0	0.0352371	0	0.0260185	0.0334294	0.229162	20.7814	52.1904	0	85.7463
937	0.350523	0.327779	0	0.0340038	0	0.0260176	0.0332923	0.228384	20.6464	51.8937	0	85.8543
938	0.352922	0.327412	0	0.0327675	0	0.0260209	0.0331499	0.227728	20.5149	51.6063	0	85.963
939	0.355361	0.327139	0	0.0315101	0	0.0260207	0.0330135	0.226956	20.3828	51.3151	0	86.0688
940	0.357808	0.326871	0	0.0302451	0	0.026021	0.0328674	0.226188	20.2521	51.0262	0	86.1735
941	0.360367	0.326491	0	0.0289656	0	0.0260076	0.032734	0.225436	20.1175	50.7293	0	86.2848
942	0.362961	0.326142	0	0.0276719	0	0.0260122	0.0325932	0.22462	19.9825	50.431	0	86.3951
943	0.365482	0.325862	0	0.0263559	0	0.0260116	0.0324458	0.223843	19.853	50.1438	0	86.4995
944	0.368059	0.325496	0	0.0250355	0	0.0260149	0.0322929	0.223101	19.7224	49.8548	0	86.6075
945	0.37073	0.325135	0	0.0236903	0	0.0260186	0.0321508	0.222276	19.5888	49.5585	0	86.7173
946	0.373325	0.324843	0	0.0223319	0	0.026017	0.0319918	0.221491	19.4608	49.273	0	86.8212
947	0.376063	0.324465	0	0.0209602	0	0.0260193	0.0318375	0.220654	19.3275	48.9762	0	86.9314
948	0.378806	0.324089	0	0.0195802	0	0.0260218	0.0316835	0.219819	19.1958	48.6826	0	87.0404
949	0.381558	0.323722	0	0.0181756	0	0.026025	0.0315303	0.218989	19.0654	48.3914	0	87.1484
950	0.384375	0.323334	0	0.016753	0	0.0260266	0.0313646	0.218146	18.9338	48.097	0	87.2577
951	0.387195	0.322949	0	0.0153138	0	0.0260284	0.0312096	0.217304	18.8039	47.8059	0	87.366
952	0.390026	0.322572	0	0.0138583	0	0.0260308	0.0310449	0.216468	18.6752	47.5171	0	87.4731
953	0.392917	0.322173	0	0.012385	0	0.0260315	0.030878	0.215616	18.5457	47.226	0	87.5815
954	0.395853	0.321809	0	0.0108963	0	0.026035	0.0307041	0.214703	18.4159	46.9332	0	87.6887
955	0.398844	0.32142	0	0.00938991	0	0.0260365	0.0305382	0.213772	18.2855	46.6388	0	87.7972
956	0.401812	0.321011	0	0.0078663	0	0.0260364	0.0303599	0.212914	18.158	46.3508	0	87.9045
957	0.404876	0.320609	0	0.0063213	0	0.0260369	0.0301823	0.211975	18.0282	46.0569	0	88.013
958	0.408002	0.320121	0	0.00475794	0	0.0260413	0.0300093	0.211068	17.8977	45.7619	0	88.1247
959	0.411086	0.319734	0	0.00317548	0	0.026043	0.0298225	0.210139	17.7707	45.4733	0	88.2308
960	0.414265	0.319353	0	0.00157296	0	0.0260452	0.0296363	0.209127	17.6417	45.1791	0	88.3379
961	0.417398	0.318867	0	0	0	0.0260499	0.0294634	0.208222	17.5164	44.8947	0	88.4456
962	0.418236	0.318498	0	0	0	0.0260531	0.0293097	0.207904	17.4836	44.8212	0	88.4779
963	0.419105	0.318152	0	0	0	0.0260582	0.0291686	0.207516	17.4495	44.7445	0	88.5101
964	0.419978	0.31781	0	0	0	0.0260636	0.0290173	0.20713	17.4154	44.6676	0	88.5421
965	0.420863	0.31741	0	0	0	0.0260642	0.0288711	0.206792	17.3812	44.5909	0	88.5762
966	0.421801	0.31698	0	0	0	0.026058	0.0287241	0.206437	17.3451	44.5099	0	88.6124
967	0.42264	0.31661	0	0	0	0.0260612	0.0285702	0.206119	17.3128	44.4375	0	88.6442
968	0.423565	0.31624	0	0	0	0.0260643	0.0284161	0.205714	17.2773	44.3573	0	88.678
969	0.424441	0.315898	0	0	0	0.0260698	0.0282645	0.205328	17.2438	44.2816	0	88.7096
970	0.425425	0.315434	0	0	0	0.0260764	0.0281143	0.204951	17.2064	44.198	0	88.7474
971	0.426319	0.31504	0	0	0	0.0260776	0.0279475	0.204616	17.1726	44.1219	0	88.7808
972	0.427258	0.314607	0	0	0	0.0260869	0.0277893	0.204259	17.1371	44.0426	0	88.8164
973	0.428185	0.314236	0	0	0	0.02609	0.027635	0.203854	17.1022	43.9636	0	88.8496
974	0.429175	0.313775	0	0	0	0.026097	0.0274742	0.203479	17.0652	43.8806	0	88.887
975	0.43007	0.31338	0	0	0	0.0260981	0.0273073	0.203144	17.0319	43.8056	0	88.92
976	0.431066	0.312922	0	0	0	0.0261054	0.0271361	0.20277	16.9949	43.7226	0	88.9571
977	0.431999	0.312554	0	0	0	0.0261088	0.0269714	0.202367	16.9604	43.6443	0	88.9899
978	0.433045	0.312068	0	0	0	0.0261138	0.0267978	0.201975	16.922	43.5579	0	89.0287
979	0.434037	0.311606	0	0	0	0.0261208	0.0266366	0.201599	16.8856	43.4762	0	89.0655
980	0.435035	0.311147	0	0	0	0.026128	0.0264651	0.201225	16.8492	43.3944	0	89.1022
981	0.436023	0.310755	0	0	0	0.0261294	0.0262877	0.200805	16.8133	43.3127	0	89.1364
982	0.437026	0.310298	0	0	0	0.026137	0.0261058	0.200433	16.777	43.231	0	89.1729
983	0.438074	0.309812	0	0	0	0.0261419	0.0259318	0.20004	16.7393	43.146	0	89.2111
984	0.439128	0.309328	0	0	0	0.0261472	0.0257474	0.19965	16.7016	43.0609	0	89.2492
985	0.440177	0.308841	0	0	0	0.0261522	0.0255733	0.199257	16.6642	42.9765	0	89.2872
986	0.441182	0.308383	0	0	0	0.0261597	0.025391	0.198884	16.6285	42.8959	0	89.3231
987	0.442237	0.307899	0	0	0	0.026165	0.0252064	0.198493	16.5912	42.8116	0	89.3608
988	0.443406	0.307296	0	0	0	0.0261718	0.0250127	0.198114	16.5502	42.7196	0	89.4045
989	0.444461	0.306811	0	0	0	0.0261771	0.024828	0.197722	16.5132	42.636	0	89.4419
990	0.445522	0.306329	0	0	0	0.0261826	0.0246329	0.197333	16.4762	42.5522	0	89.4792
991	0.446583	0.305847	0	0	0	0.0261881	0.0244377	0.196943	16.4394	42.4687	0	89.5164
992	0.447793	0.30527	0	0	0	0.0261972	0.0242457	0.196494	16.3976	42.3744	0	89.5594
993	0.448904	0.30476	0	0	0	0.0262005	0.0240482	0.196087	16.3594	42.2878	0	89.5982
994	0.450033	0.304186	0	0	0	0.0262099	0.0238458	0.195726	16.3209	42.201	0	89.6391
995	0.451145	0.303676	0	0	0	0.0262131	0.0236481	0.195318	16.283	42.115	0	89.6775
996	0.452362	0.3031	0	0	0	0.0262225	0.0234454	0.19487	16.2418	42.0216	0	89.72
997	0.453479	0.302593	0	0	0	0.0262261	0.0232373	0.194464	16.2041	41.9359	0	89.7581
998	0.454664	0.301994	0	0	0	0.0262335	0.023022	0.194087	16.1644	41.8463	0	89.8002
999	0.455884	0.301417	0	0	0	0.0262429	0.0228188	0.193638	16.1237	41.7538	0	89.8422
1000	0.45707	0.300817	0	0	0	0.0262503	0.0226033	0.19326	16.0843	41.6648	0	89.884

## Sheet: G49248
Zhao, P., et al., 2021, The role of phyllosilicate partial melting in segregating tungsten and tin deposits in W-Sn metallogenic provinces: Geology, https://doi.org/10.1130/G49248.1
